# Supplementary material for: Macrocyclic peptidomimetics with antimicrobial activity: synthesis, bioassay, and molecular modeling studies
Source: Royal Society of Chemistry journal article supplement (doi:10.1039/c5ob01400j), 2015-01-01
Supplement: c5ob01400j1.pdf [file c5ob01400j1.pdf]

## Supporting information

### **Macrocyclic peptidomimetics with antimicrobial activity: synthesis, bioassay, and molecular modeling studies**

Mohamed A. Ibrahim,<sup>\*a,b,c</sup> Siva S. Panda,<sup>\*a,d</sup> Alexander A. Oliferenko,<sup>a</sup> Polina V. Oliferenko,<sup>a</sup> Adel S. Girgis,<sup>e</sup> Mohamed Elagawany,<sup>a,f</sup> F. Zehra Küçükbay,<sup>a,g</sup> Chandramukhi S. Panda,<sup>a</sup> Girinath G. Pillai,<sup>a,h</sup> Ahmed Samir,<sup>i</sup> Kaido Tamm,<sup>h</sup> C. Dennis Hall<sup>a</sup> and Alan R. Katritzky<sup>a,†</sup>

<sup>a</sup>*Department of Chemistry, University of Florida, Gainesville, FL 32611-7200, USA. E-mail: [drmmonem@yahoo.com](mailto:drmmonem@yahoo.com), [sspanda12@gmail.com](mailto:sspanda12@gmail.com); fax: +1-352-392-9199; Tel: +1-352-870-9288.*

<sup>b</sup>*Department of Organic Chemistry, College of pharmacy, Misr University for Science and Technology, Al-Motamayez District, 6th of the October, P.O.Box: 77, Egypt*

<sup>c</sup>*Department of Pharmaceutical Chemistry, College of Pharmacy, Almaarefa college, Riyadh, Kingdom of Saudia Arabia.*

<sup>d</sup>*Department of Chemistry & Physics, Georgia Regents University, Augusta, GA 30912, USA*

<sup>e</sup>*Pesticide Chemistry Department, National Research Centre, Dokki, Cairo 12622, Egypt.*

<sup>f</sup>*Department of Pharmaceutical Chemistry, faculty of pharmacy, Damanhour University, Damanhour, Egypt*

<sup>g</sup>*Department of Basic Pharmaceutical Sciences, İnönü University, 44280 Malatya, Turkey*

<sup>h</sup>*Department of Chemistry, University of Tartu, 50411 Tartu, Estonia*

<sup>i</sup>*Department of Microbiology, Faculty of Veterinary Medicine, Cairo University, Cairo, Egypt*

<sup>†</sup>*Deceased on February 10, 2014*

## **Table of contents**

1.  $^1\text{H}$  NMR,  $^{13}\text{C}$  NMR, CHN/HRMS of all the compounds
2. **Table S1.** Molecular descriptor values of the BMLR-QSAR model for the antifungal active macrocyclic peptidomimetics.
3. **Figure S1.** (A) Constraint distances, and (B) constraint angle of the generated 3D-pharmacophore for the antifungal bio-active compounds **4a-4l**, and **5-7** against *C. albicans* which contains two hydrogen bonding acceptor (HBA-1, HBA-2, green), and one hydrogen bonding donor (HBD, purple).
4. **Figure S2.** 3D-pharmacophore mapped on the antifungal macrocyclic peptidomimetics **4a-4l**, and **5-7**.
5. **Figure S3.** Dose-response curves of the macrocyclic peptidomimetics **4a-l**, and **5-7** against HepG2 (liver) human tumor cell line.
6. **Figure S4.** Dose-response curves of the macrocyclic peptidomimetics **4a-l**, and **5-7** against HeLa (cervical) human tumor cell line.
7. **Figure S5.** Dose-response curves of the macrocyclic peptidomimetics **4a-l**, and **5-7** against HCT116 (colon) human tumor cell line.
8. **Figure S6.** Dose-response curves of the macrocyclic peptidomimetics **4a-l**, and **5-7** against PC3 (prostate) human tumor cell line.
9. **Figure S7.** Dose-response curves of the macrocyclic peptidomimetics **4a-l**, and **5-7** against MCF7 (breast) human tumor cell line.

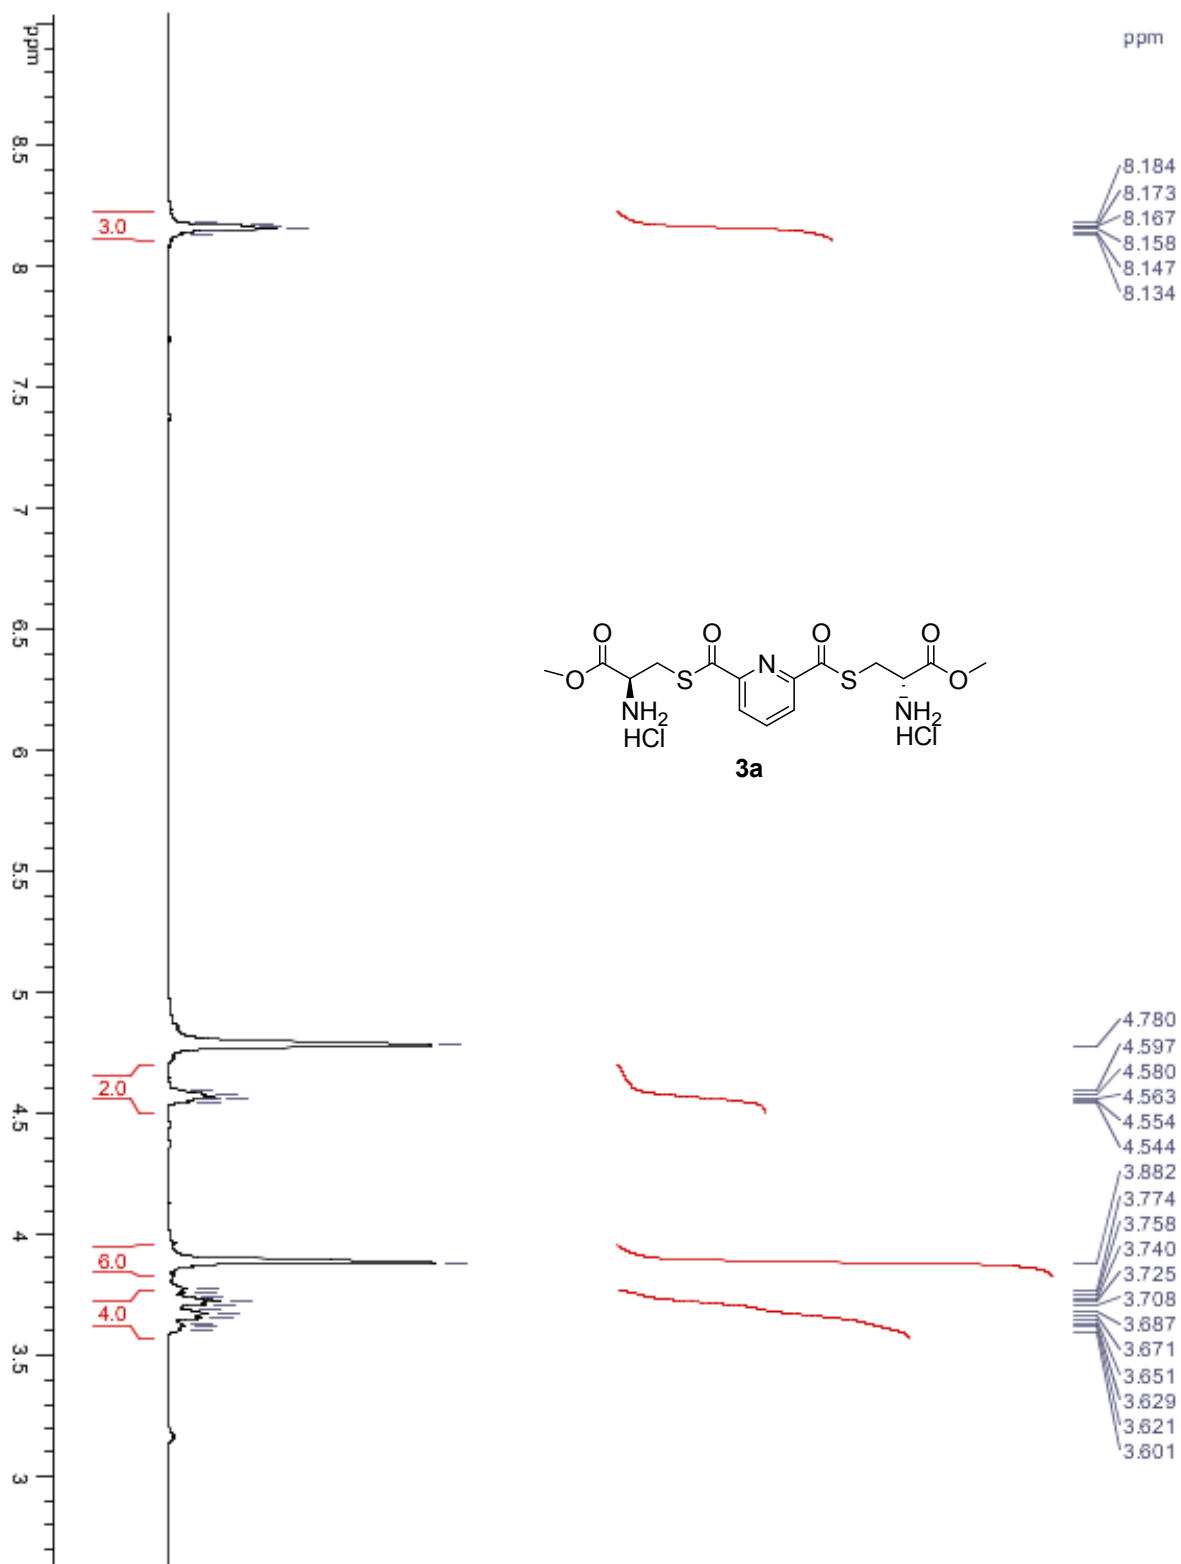

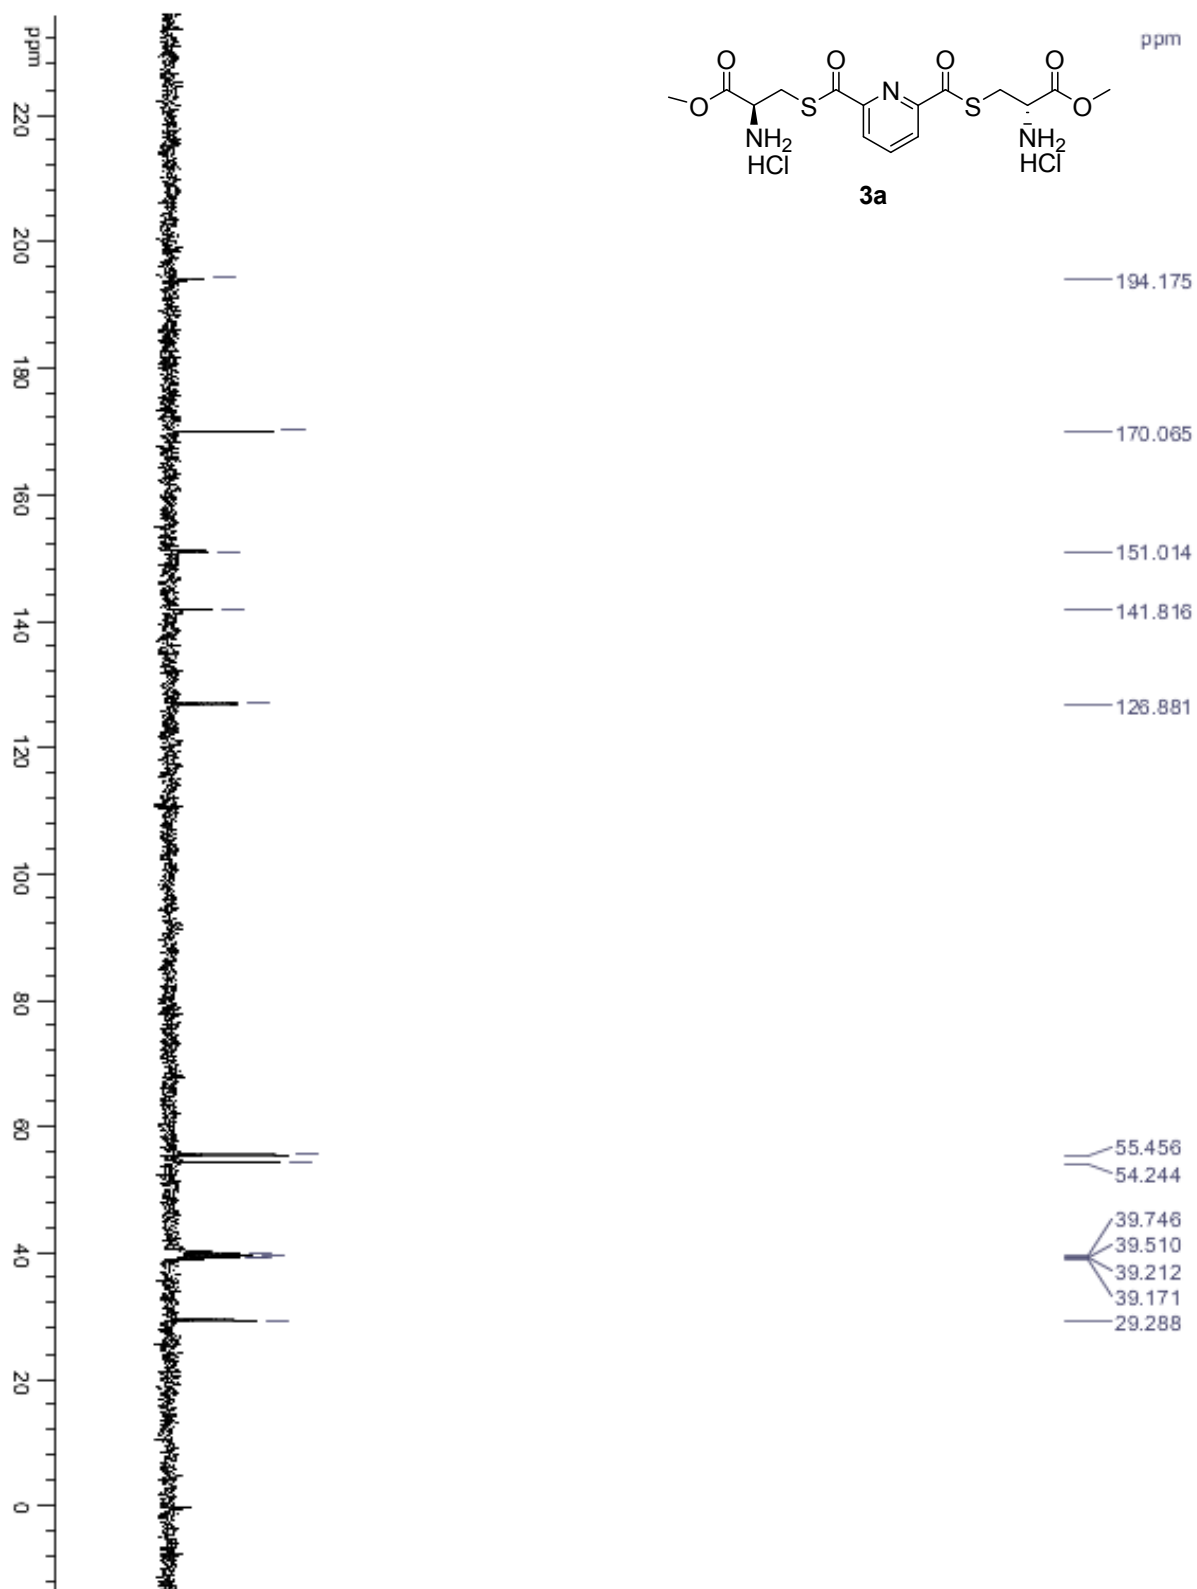

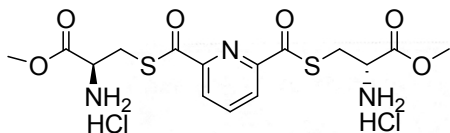

3a

EAGER 200 Stripchart

Sample Ident. : 20 Maaa6esterHCl      Filename : 266420  
 Analysed : 01-11-12 08:53:19      Printed : 01-11-2012 09:03:20

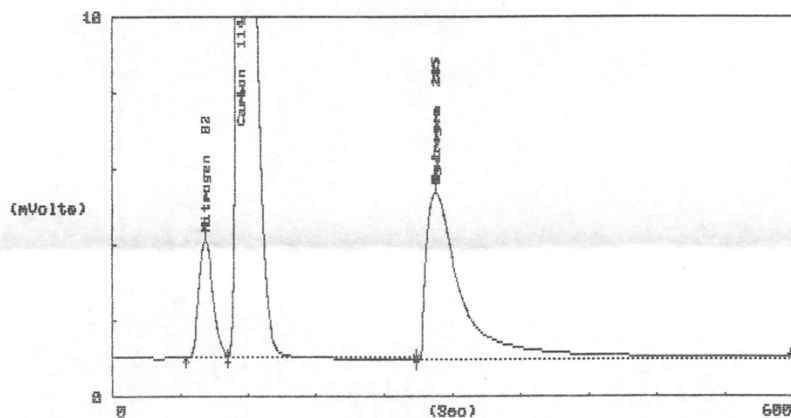

EAGER 200 Peak Integration Report

Instrument name : Instrument #1      Bline drift (fV):-4.7  
 Company Name : U of Florida      Operator Ident. : KOU  
 Analysed : 01-11-12 08:53:19      Printed : 01-11-2012 09:03:21  
 Sample Ident. : 20 Maaa6esterHCl      Filename : 266420  
 Sample Weight : 2.168      Calc.method: using 'K. Factors'

| No. (#) | Type (#) | Start (Sec) | End (Sec) | Ret Time (Sec) | Height (fV) | Area (fV*Sec) | Area % (%) | Name     |
|---------|----------|-------------|-----------|----------------|-------------|---------------|------------|----------|
| 1       | FU       | 65          | 102       | 82             | 3092.2      | 42236         | 6.08       | Nitrogen |
| 2       | FU       | 102         | 268       | 114            | 33619.0     | 492721        | 70.94      | Carbon   |
| 3       | RS       | 268         | 598       | 285            | 4358.5      | 159626        | 22.98      | Hydrogen |
|         |          |             |           |                |             | 694583        | 100.00     |          |

EAGER 200 Unk Report

Instrument name : Instrument #1      Bline drift (fV):-4.7  
 Company Name : U of Florida      Operator Ident. : KOU  
 Analysed : 01-11-12 08:53:19      Printed : 01-11-2012 09:03:21  
 Sample Ident. : 20 Maaa6esterHCl      Filename : 266420  
 Sample Weight : 2.168      Calc.method: using 'K. Factors'

| Pk. (#) | Ret Time (Sec) | Area (fV*Sec) | Element % (%) | Area Ratio  | Name     |
|---------|----------------|---------------|---------------|-------------|----------|
| 1       | 82             | 42236         | 8.828         | .116658E+02 | Nitrogen |
| 2       | 114            | 492721        | 37.745        | .100000E+01 | Carbon   |
| 3       | 285            | 159626        | 4.569         | .308673E+01 | Hydrogen |

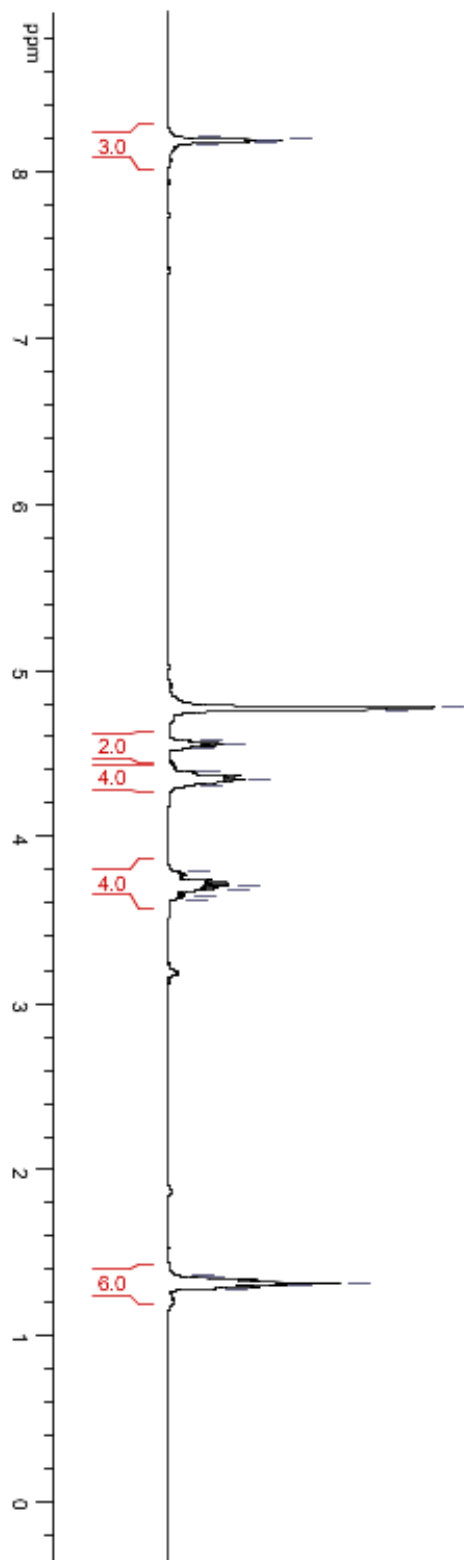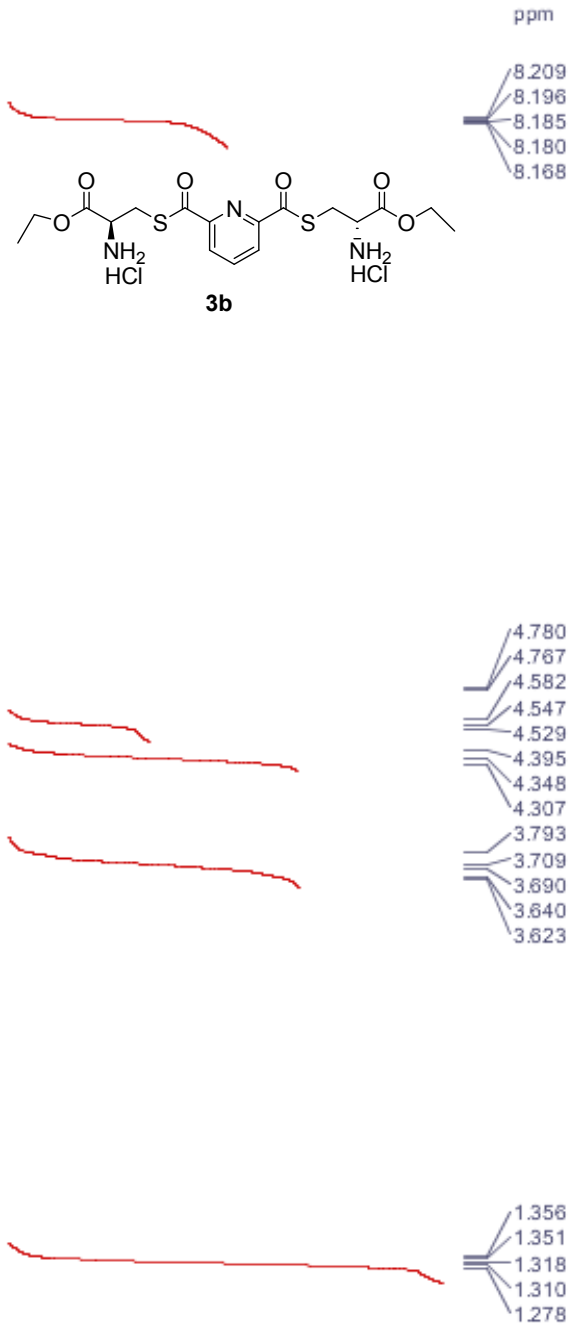

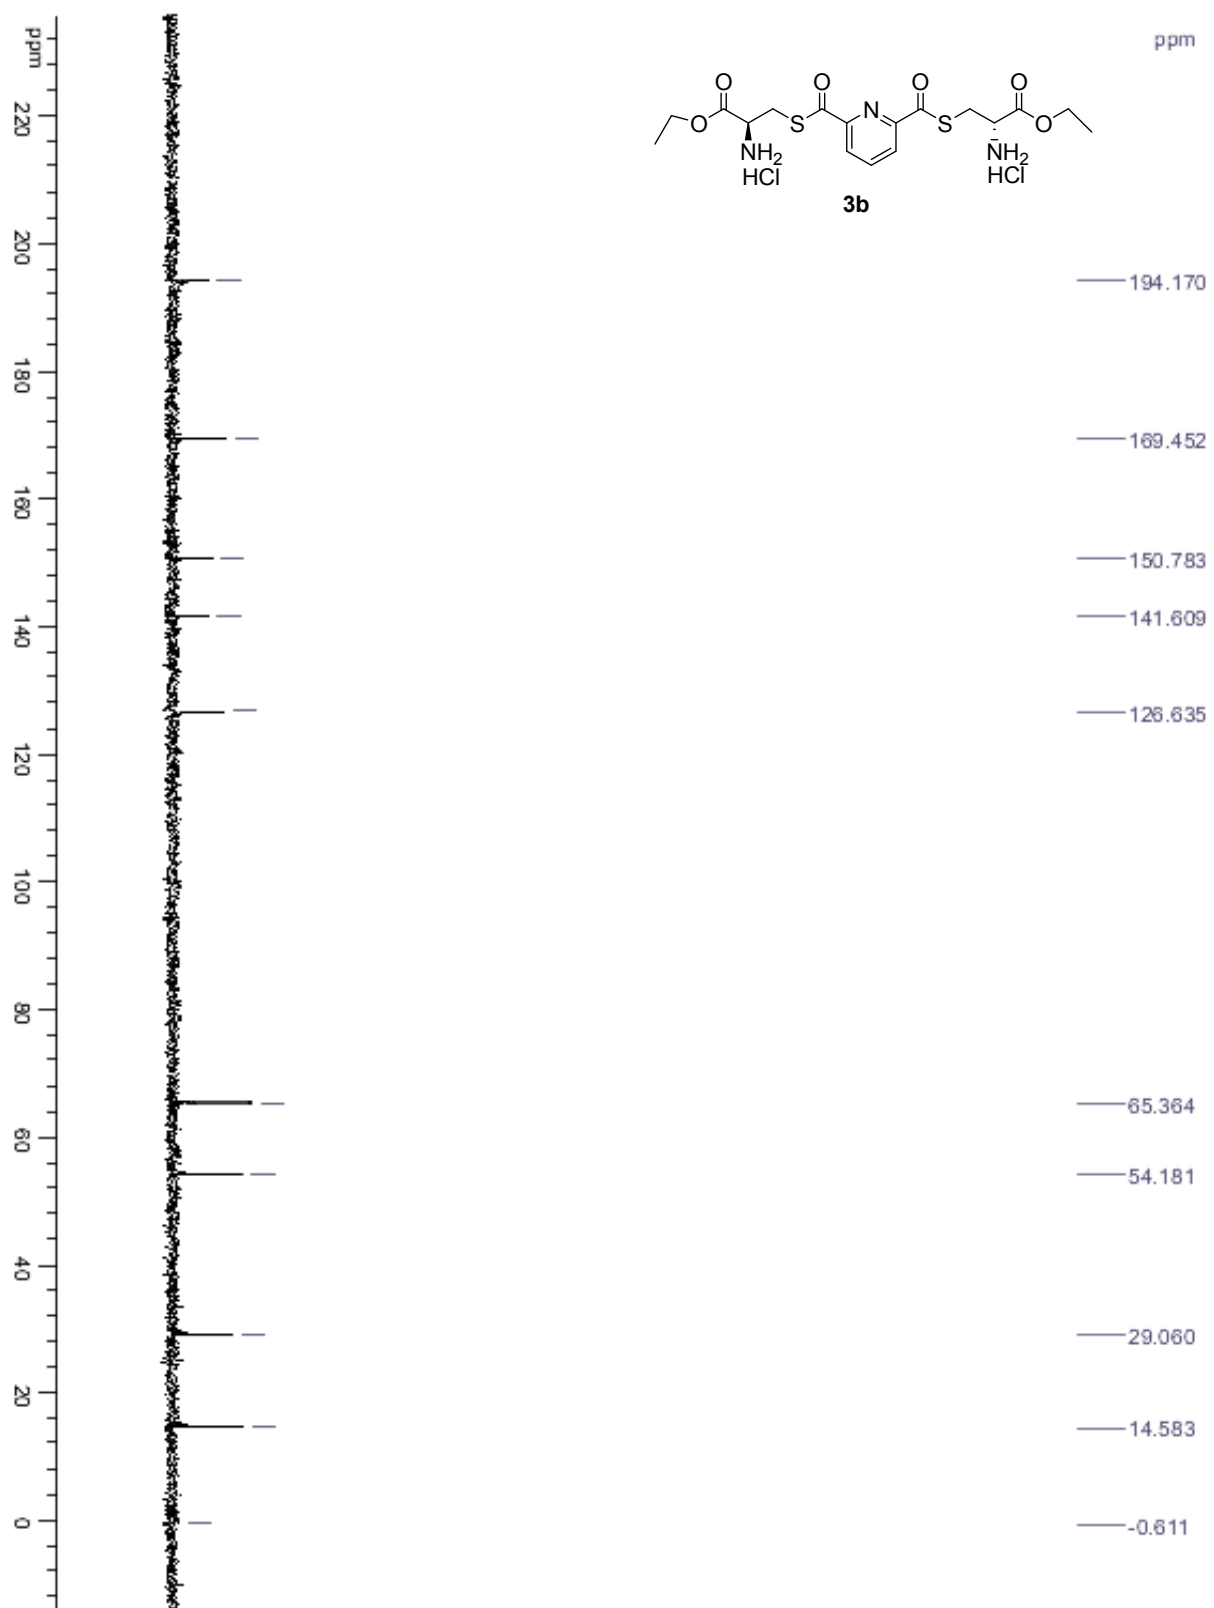

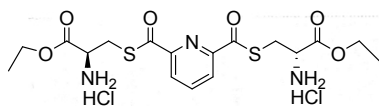

3b

EAGER 200 Stripchart

Sample Ident. : 20 maaa6ethyl      Filename : 267120  
 Analysed : 02-14-12 08:47:21      Printed : 02-14-2012 08:57:24

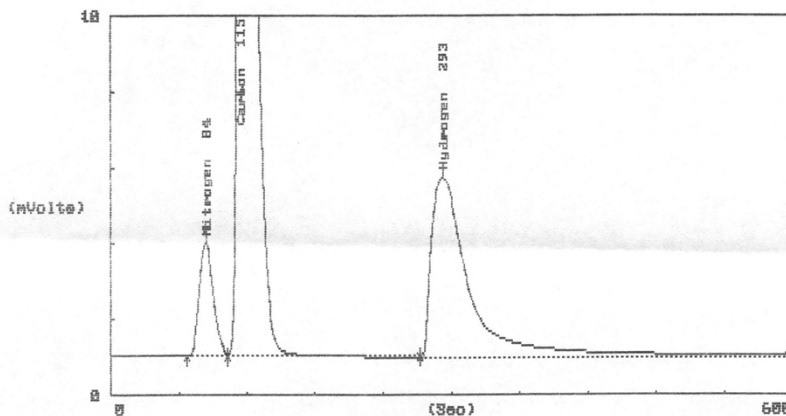

EAGER 200 Peak Integration Report

Instrument name : Instrument #1      Bline drift (fV): .9  
 Company Name : U of Florida      Operator Ident. : KOU  
 Analysed : 02-14-12 08:47:21      Printed : 02-14-2012 08:57:24  
 Sample Ident. : 20 maaa6ethyl      Filename : 267120  
 Sample Weight : 2.172      Calc.method: using 'K. Factors'

| No. (#) | Type (#) | Start (Sec) | End (Sec) | Ret Time (Sec) | Height (fV) | Area (fV*Sec) | Area % (%) | Name     |
|---------|----------|-------------|-----------|----------------|-------------|---------------|------------|----------|
| 1       | FU       | 67          | 103       | 84             | 2962.1      | 40633         | 5.34       | Nitrogen |
| 2       | FU       | 103         | 272       | 115            | 36689.9     | 538909        | 70.78      | Carbon   |
| 3       | RS       | 272         | 597       | 293            | 4711.7      | 181833        | 23.88      | Hydrogen |

761375 100.00

EAGER 200 Unk Report

Instrument name : Instrument #1      Bline drift (fV): .9  
 Company Name : U of Florida      Operator Ident. : KOU  
 Analysed : 02-14-12 08:47:21      Printed : 02-14-2012 08:57:24  
 Sample Ident. : 20 maaa6ethyl      Filename : 267120  
 Sample Weight : 2.172      Calc.method: using 'K. Factors'

| Pk. (#) | Ret Time (Sec) | Area (fV*Sec) | Element % (%) | Area Ratio  | Name     |
|---------|----------------|---------------|---------------|-------------|----------|
| 1       | 84             | 40633         | 8.454         | .132628E+02 | Nitrogen |
| 2       | 115            | 538909        | 40.999        | .100000E+01 | Carbon   |
| 3       | 293            | 181833        | 5.372         | .296375E+01 | Hydrogen |



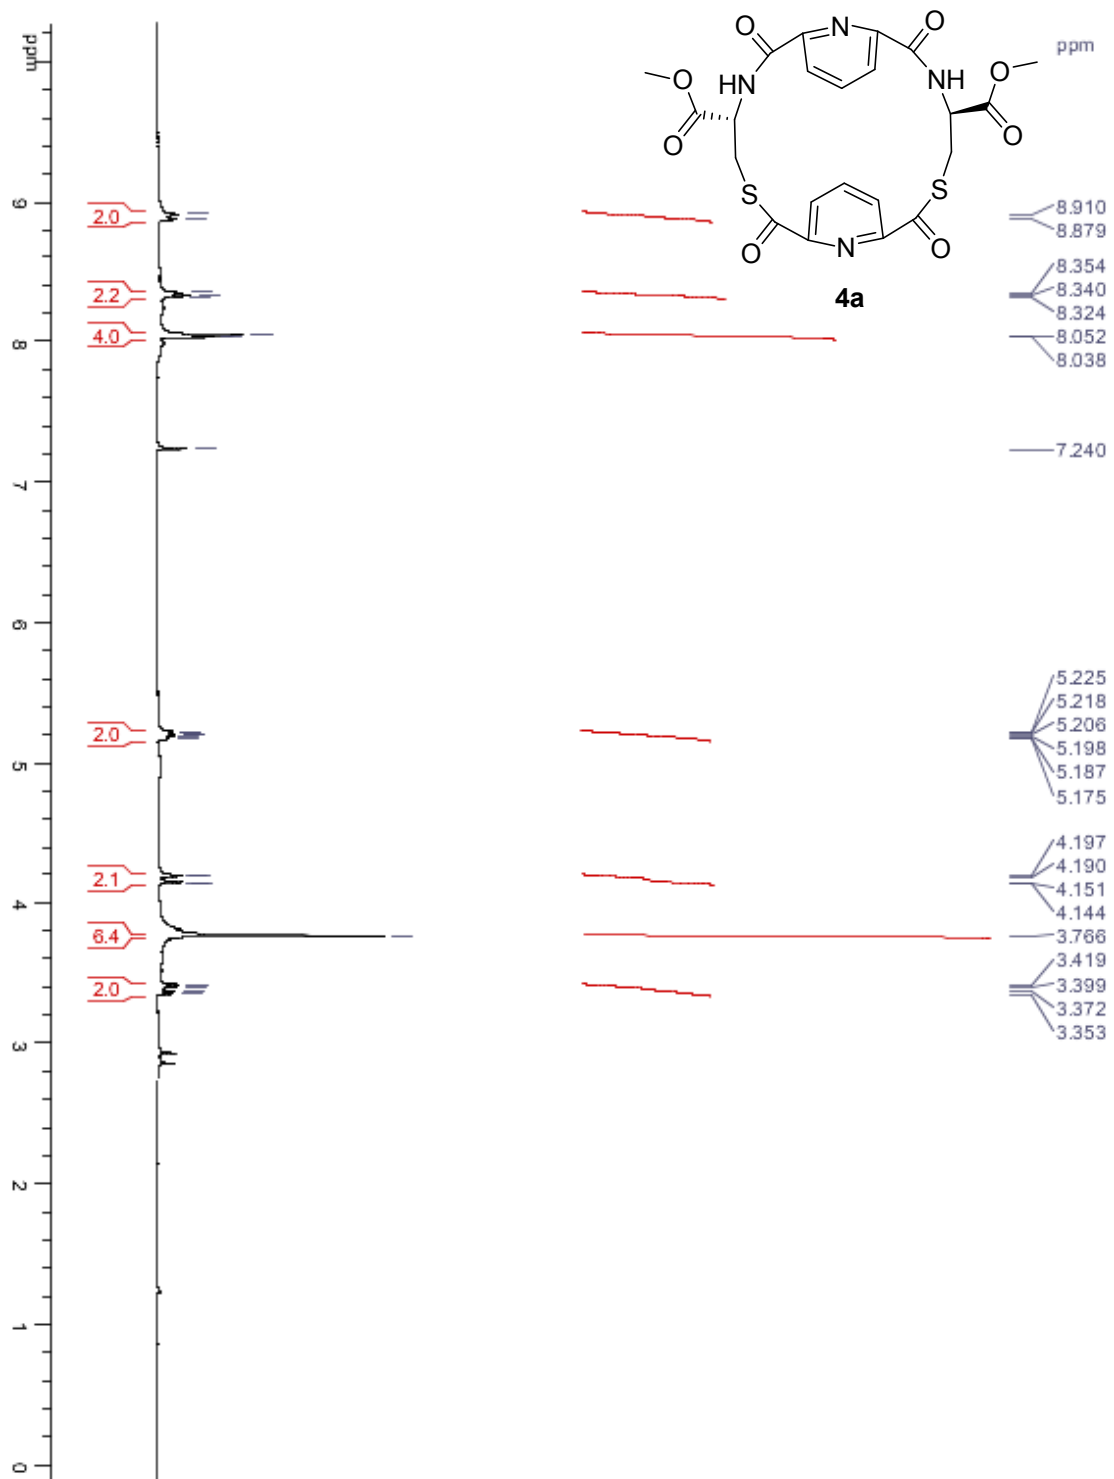

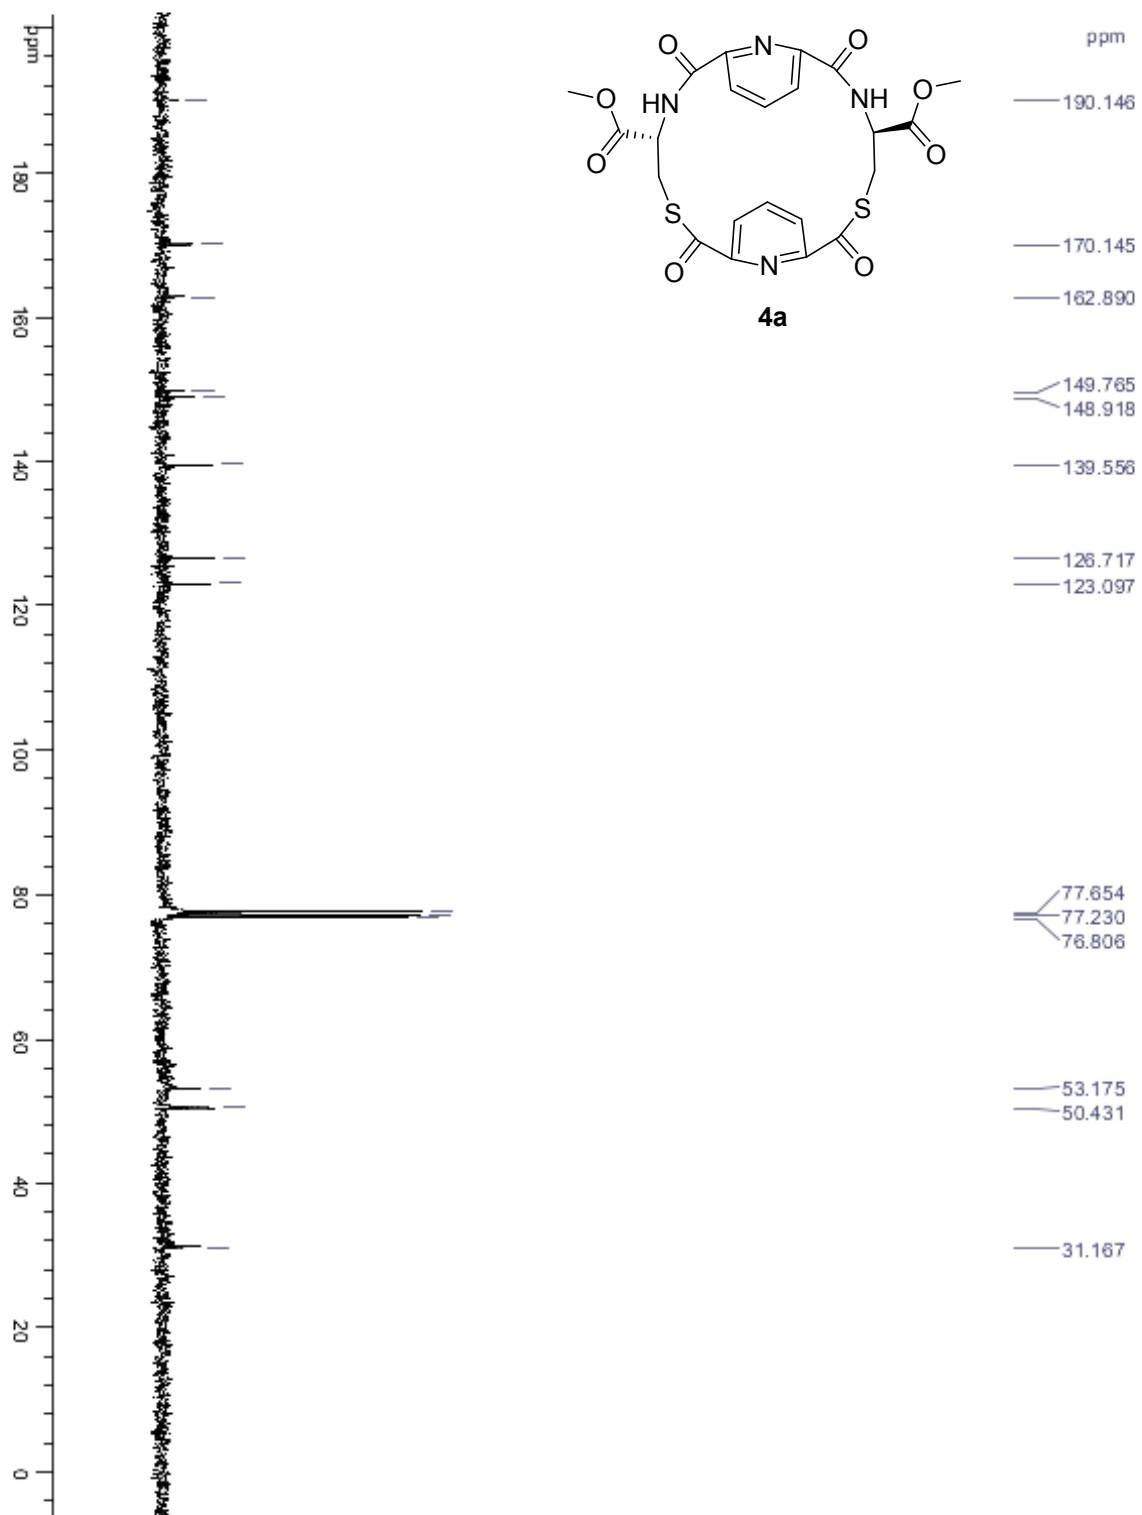

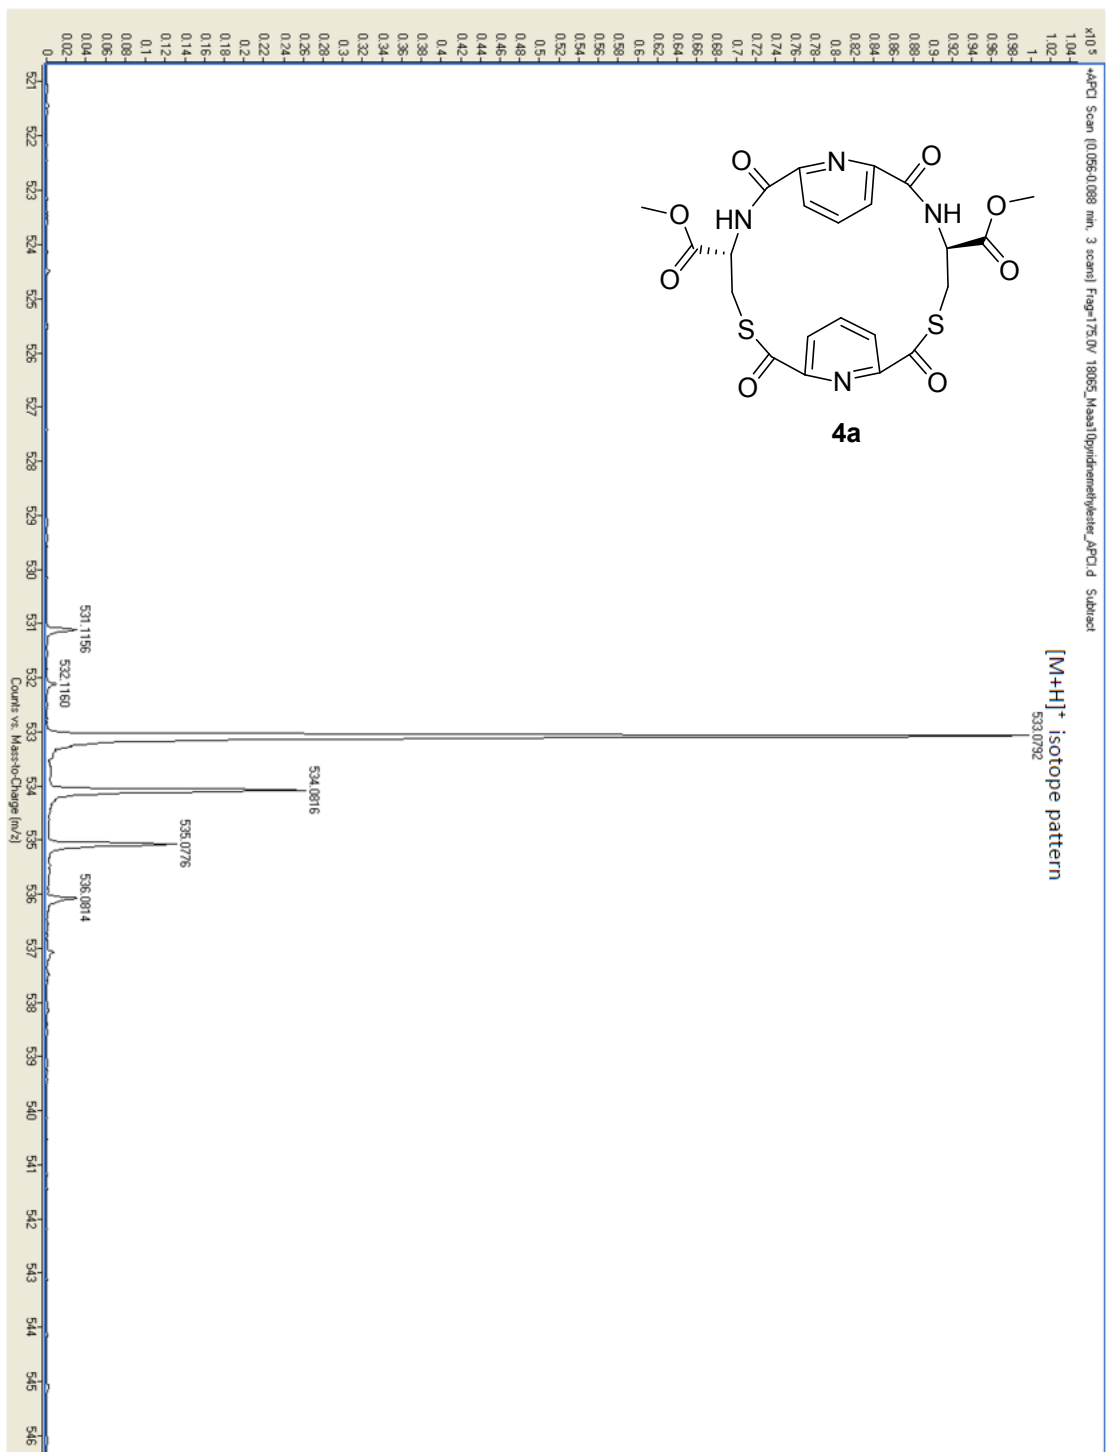

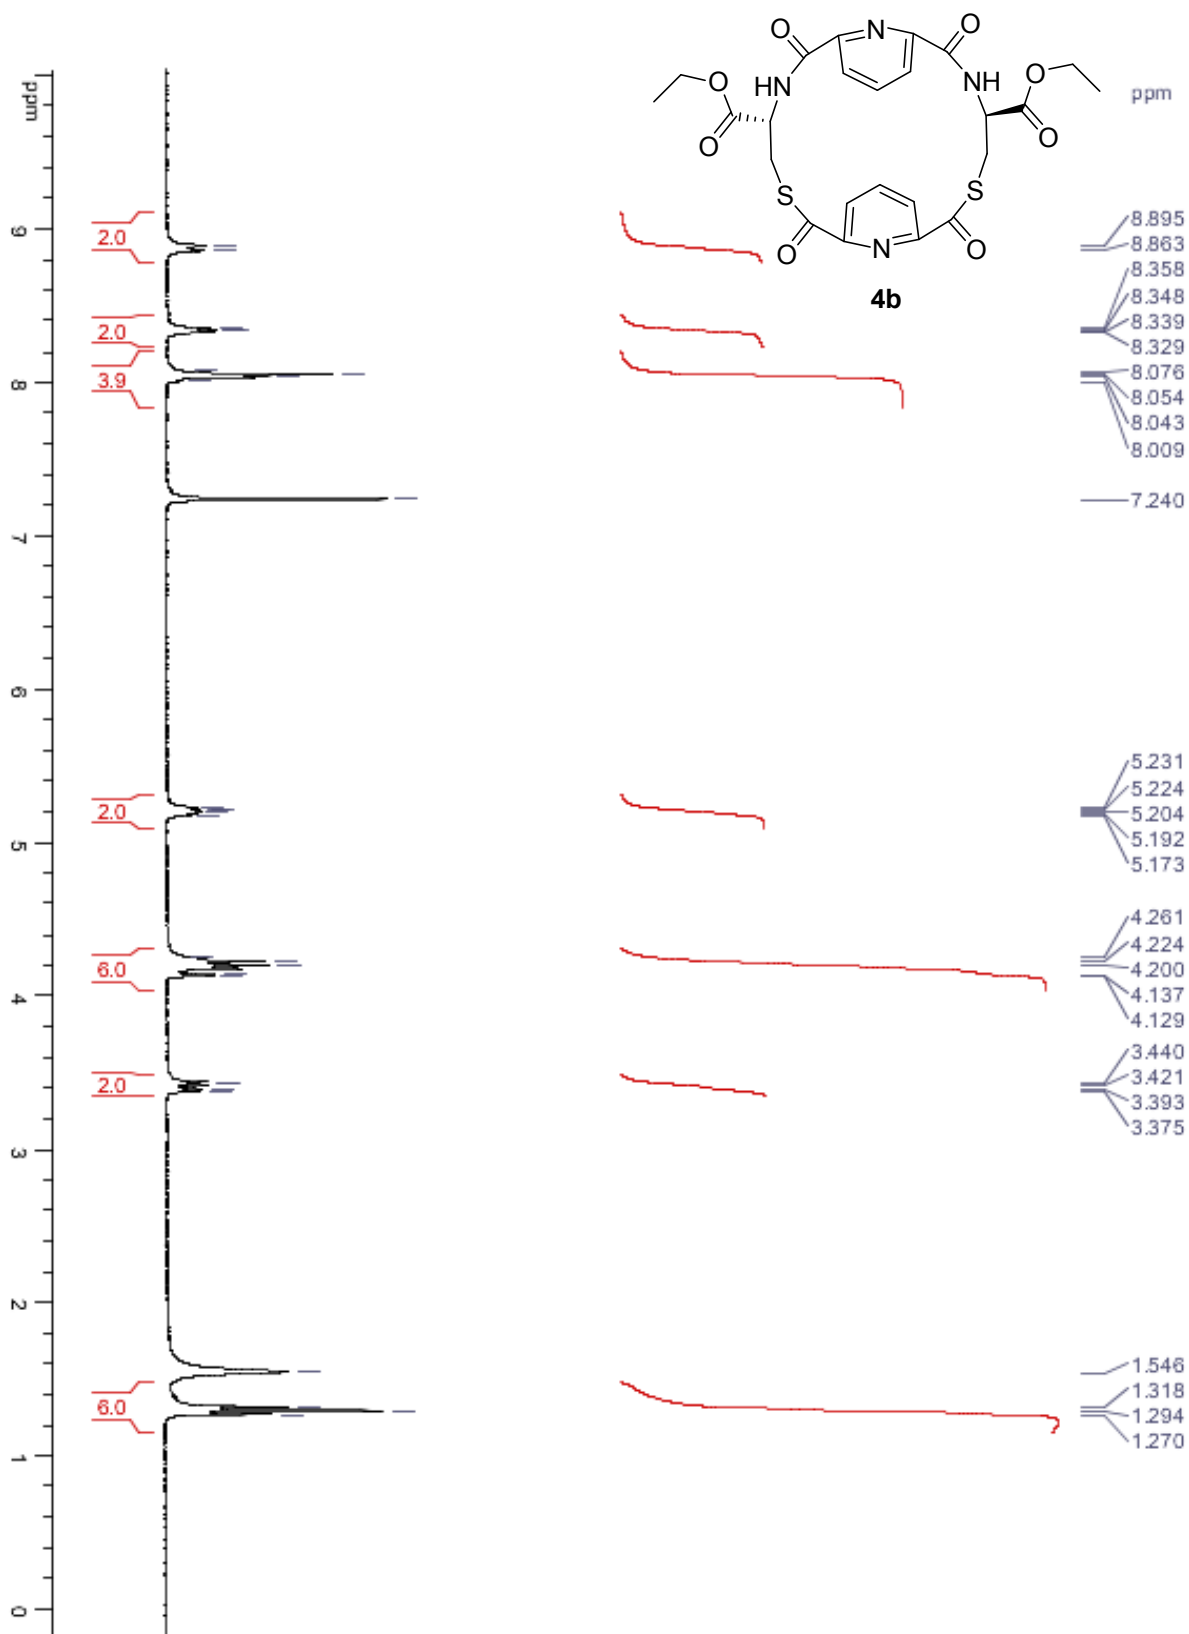

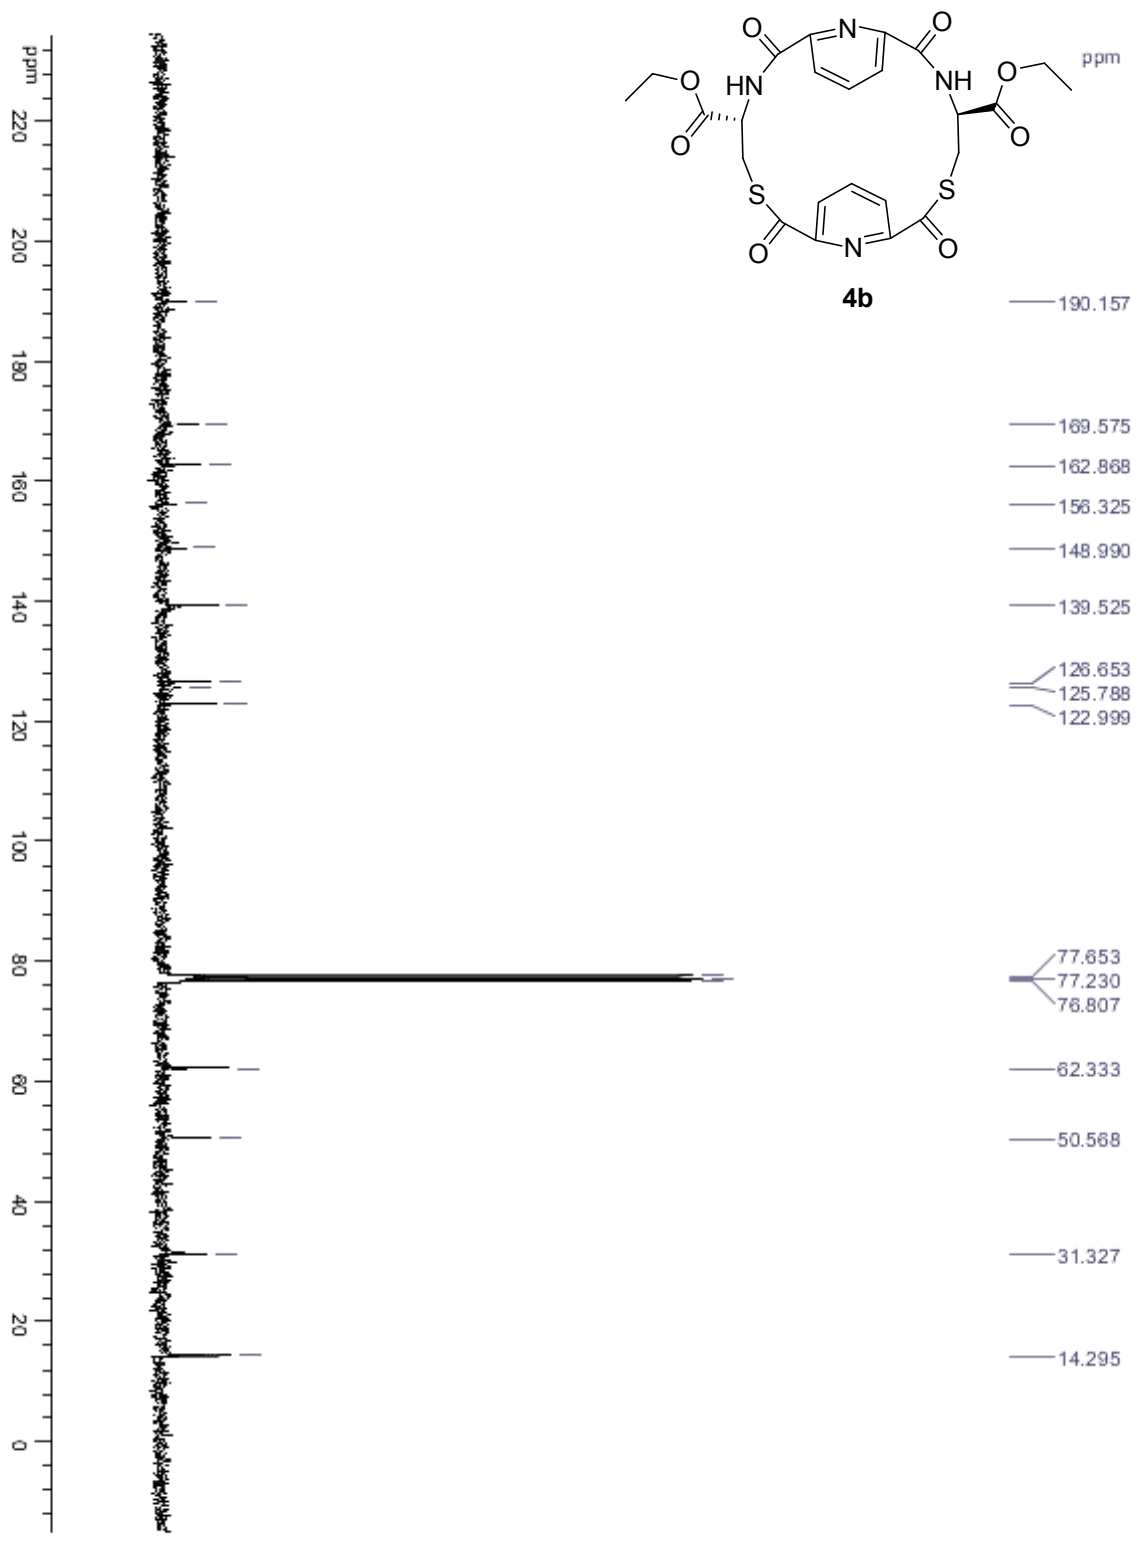

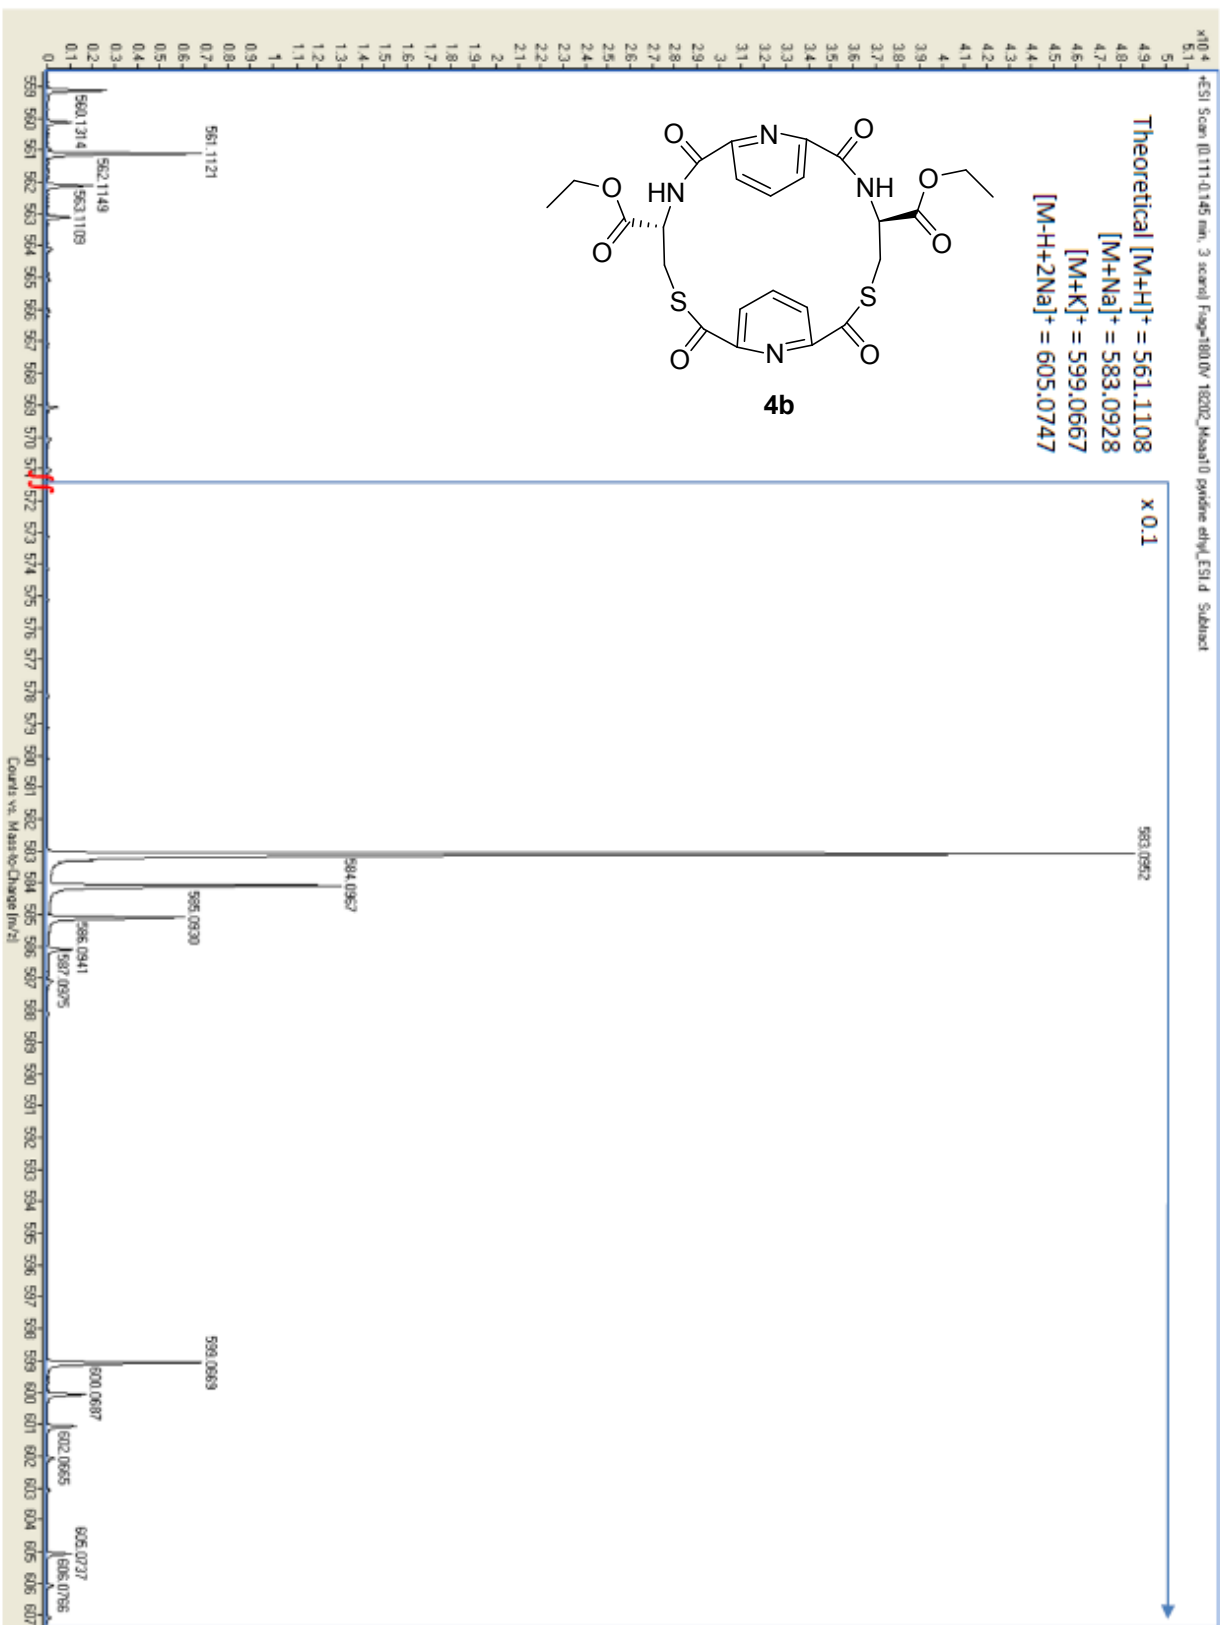

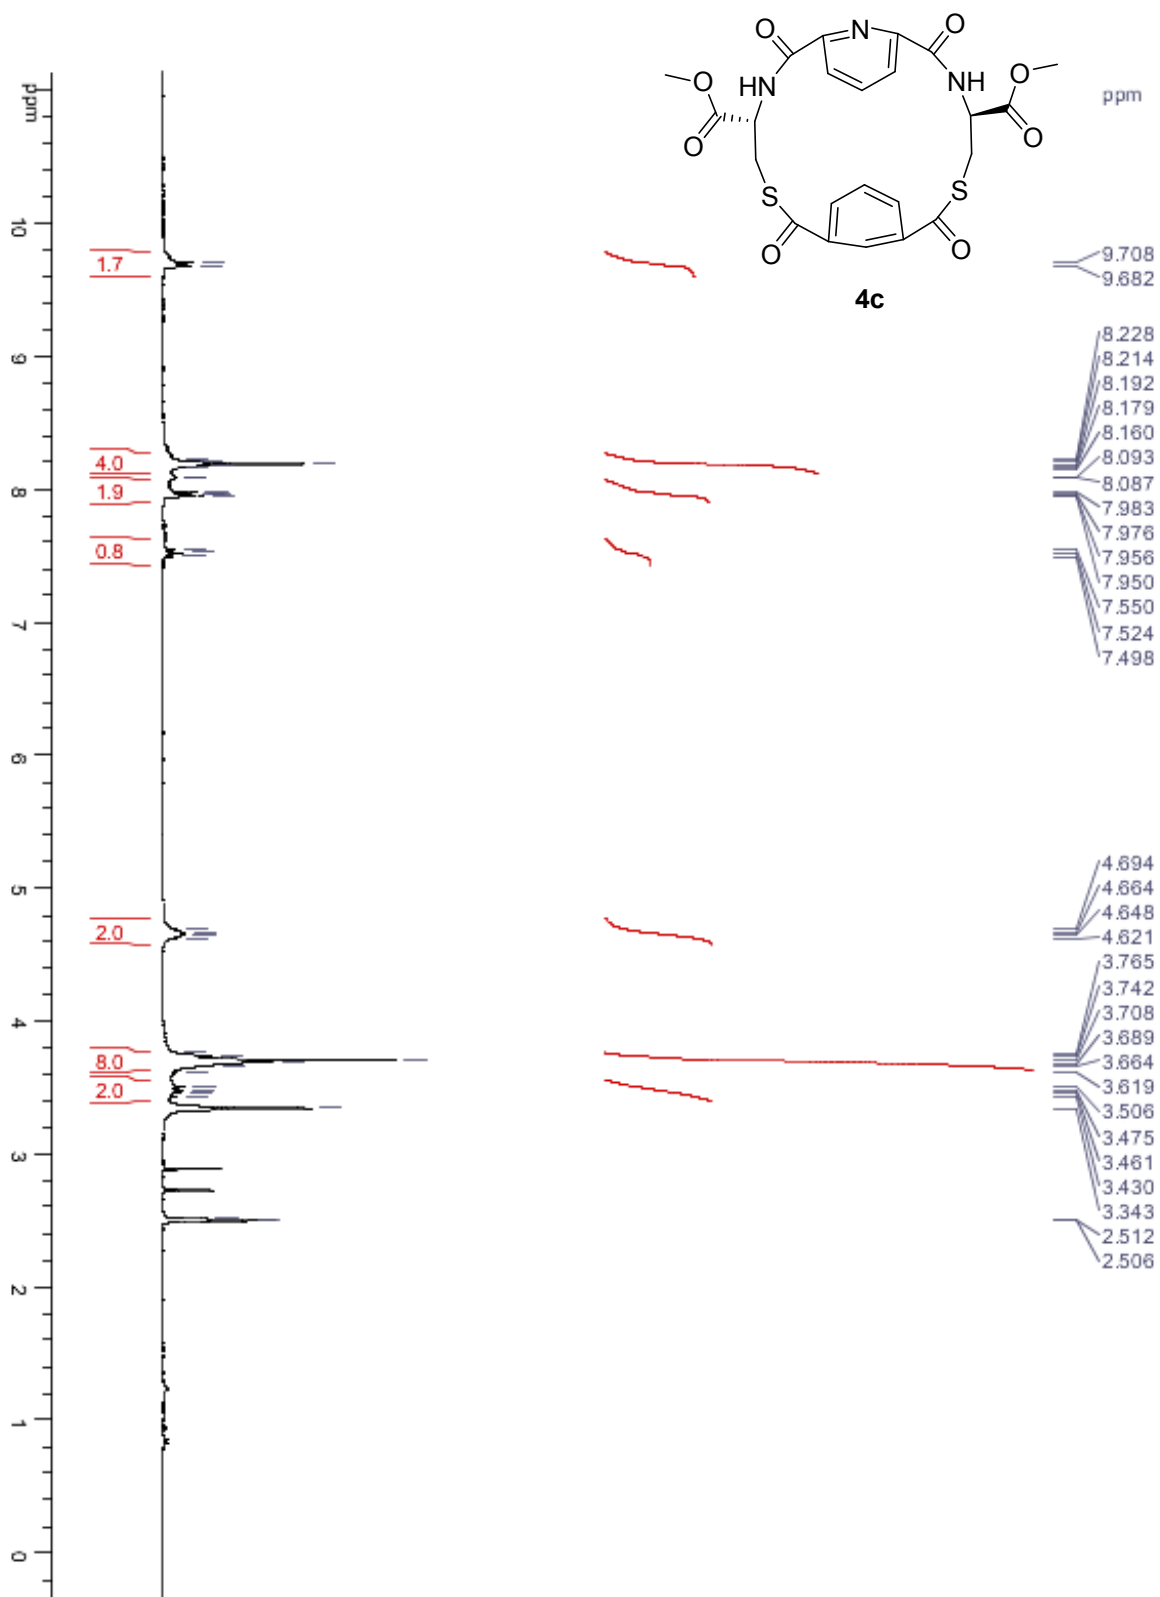

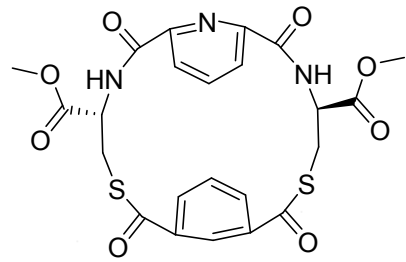

4c

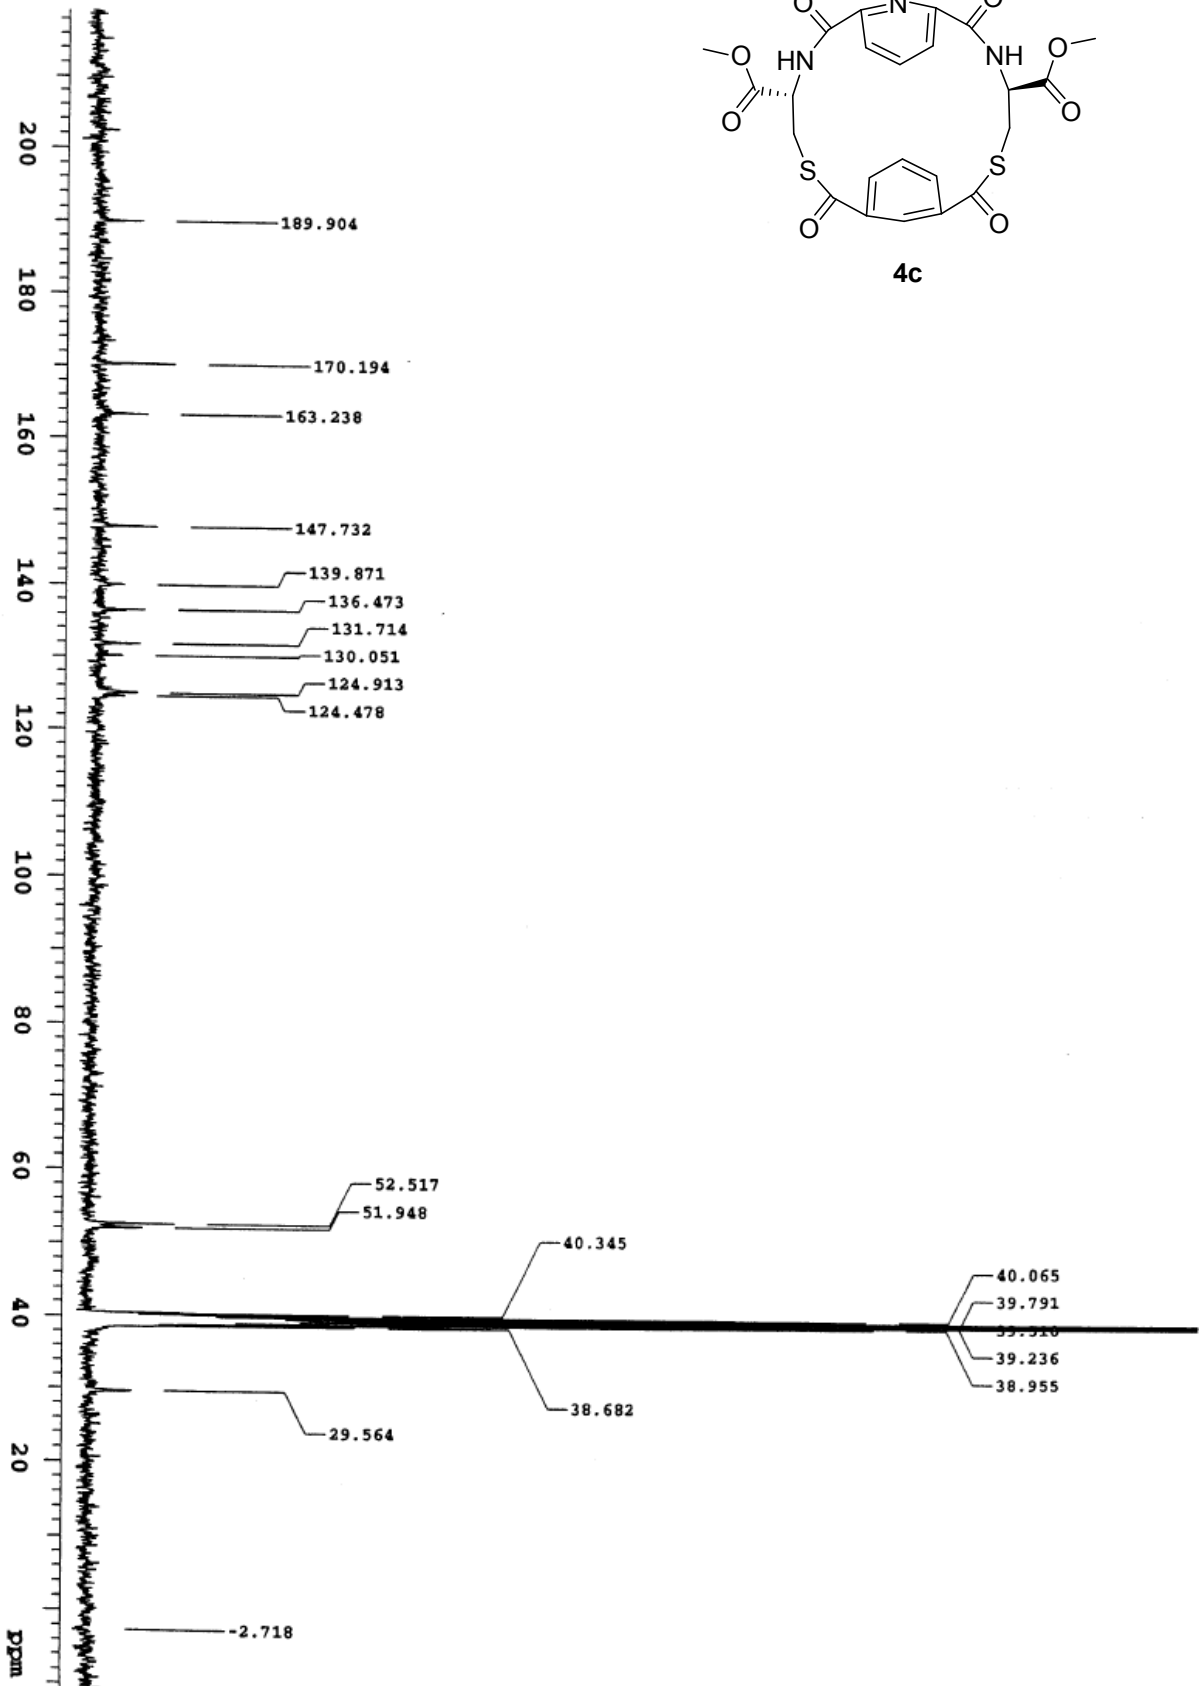



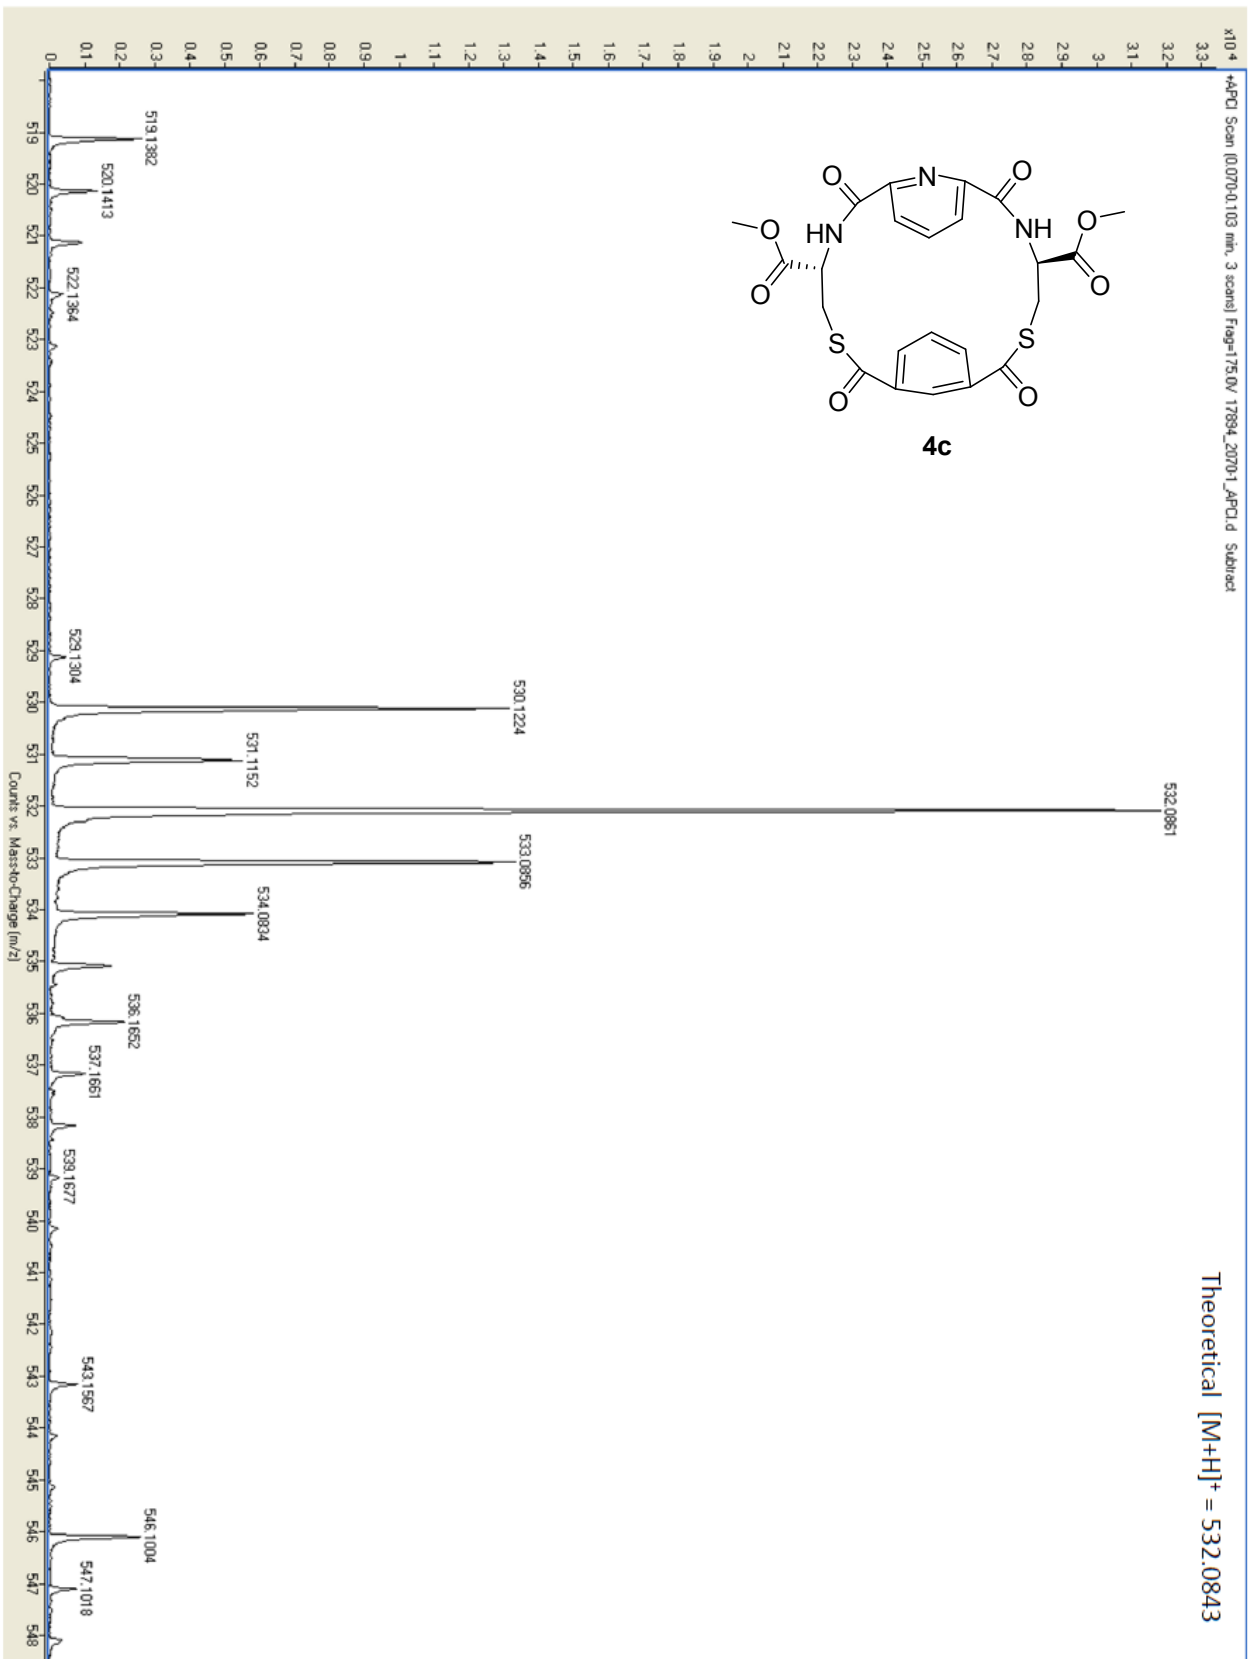

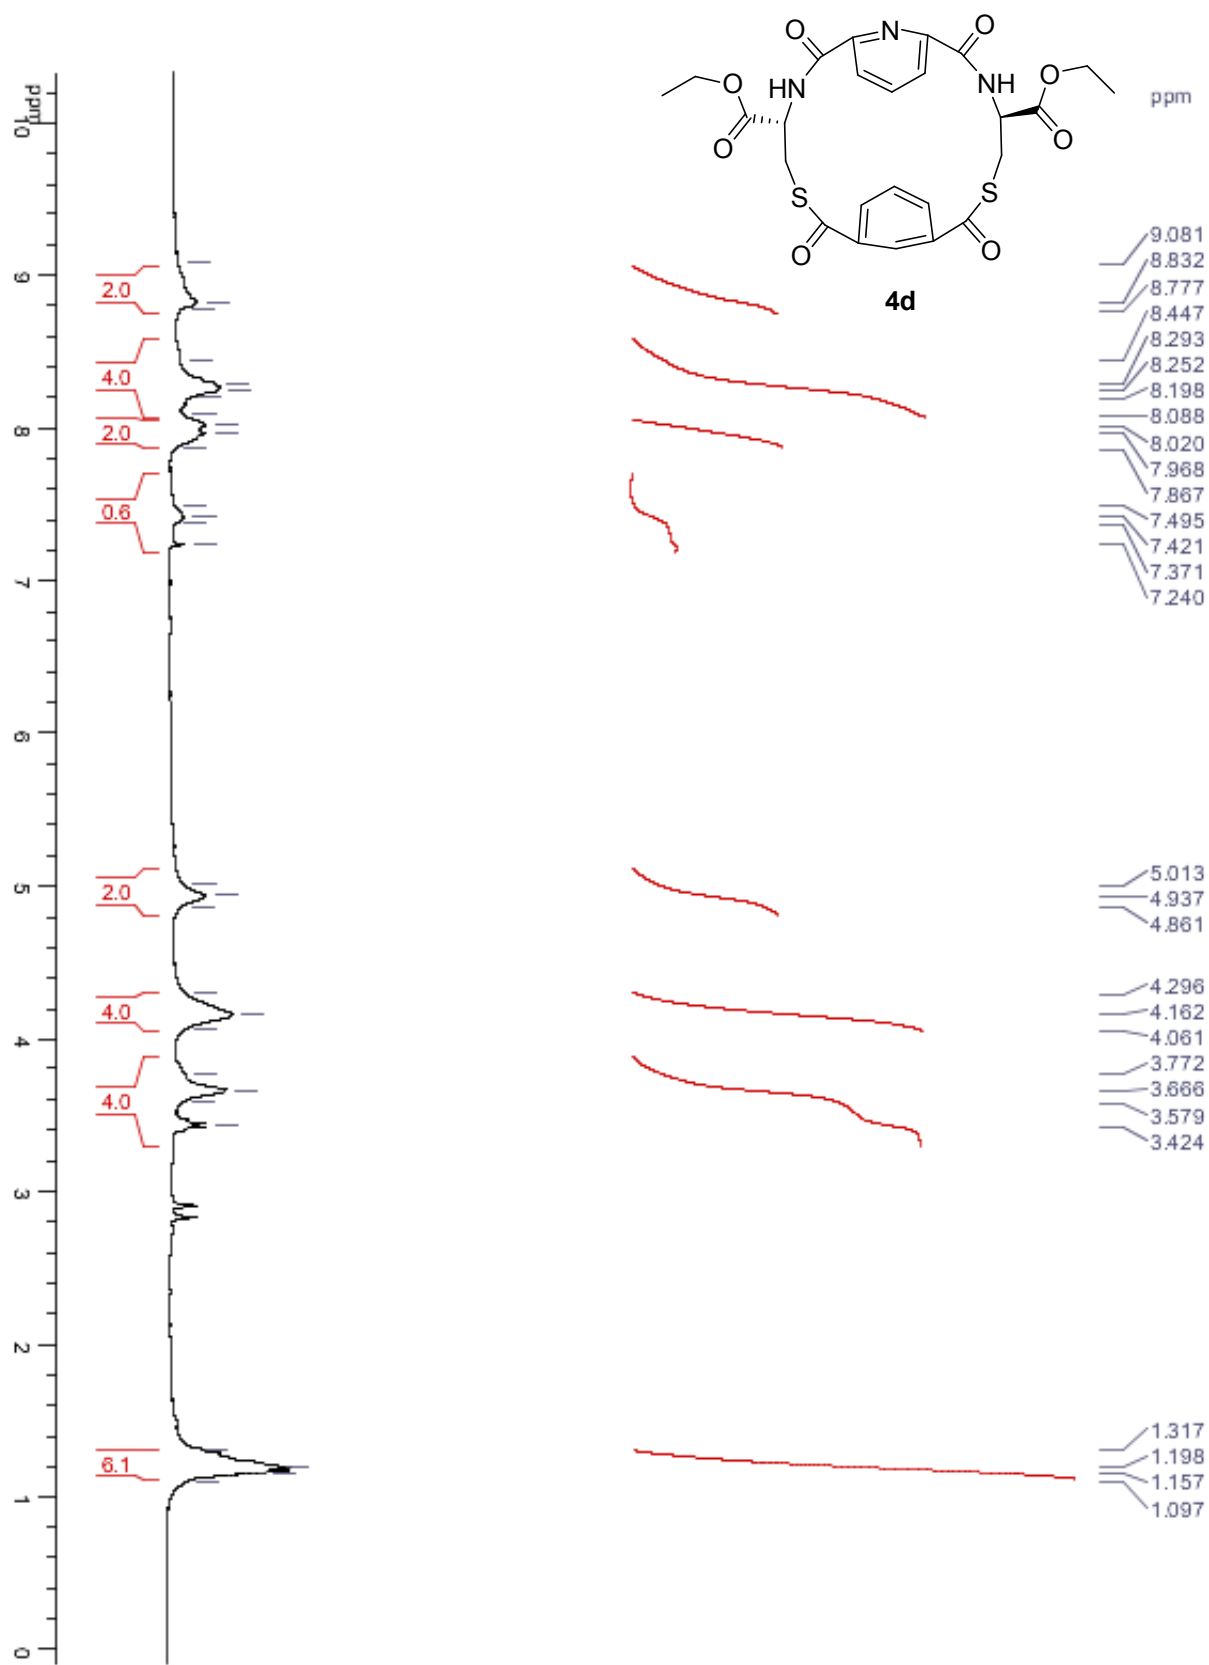

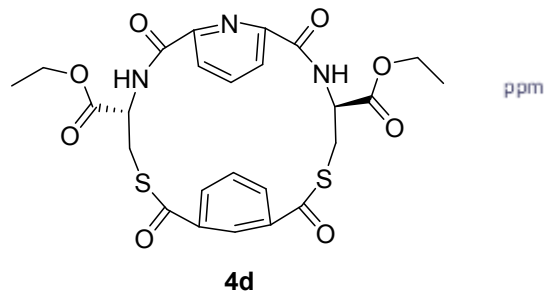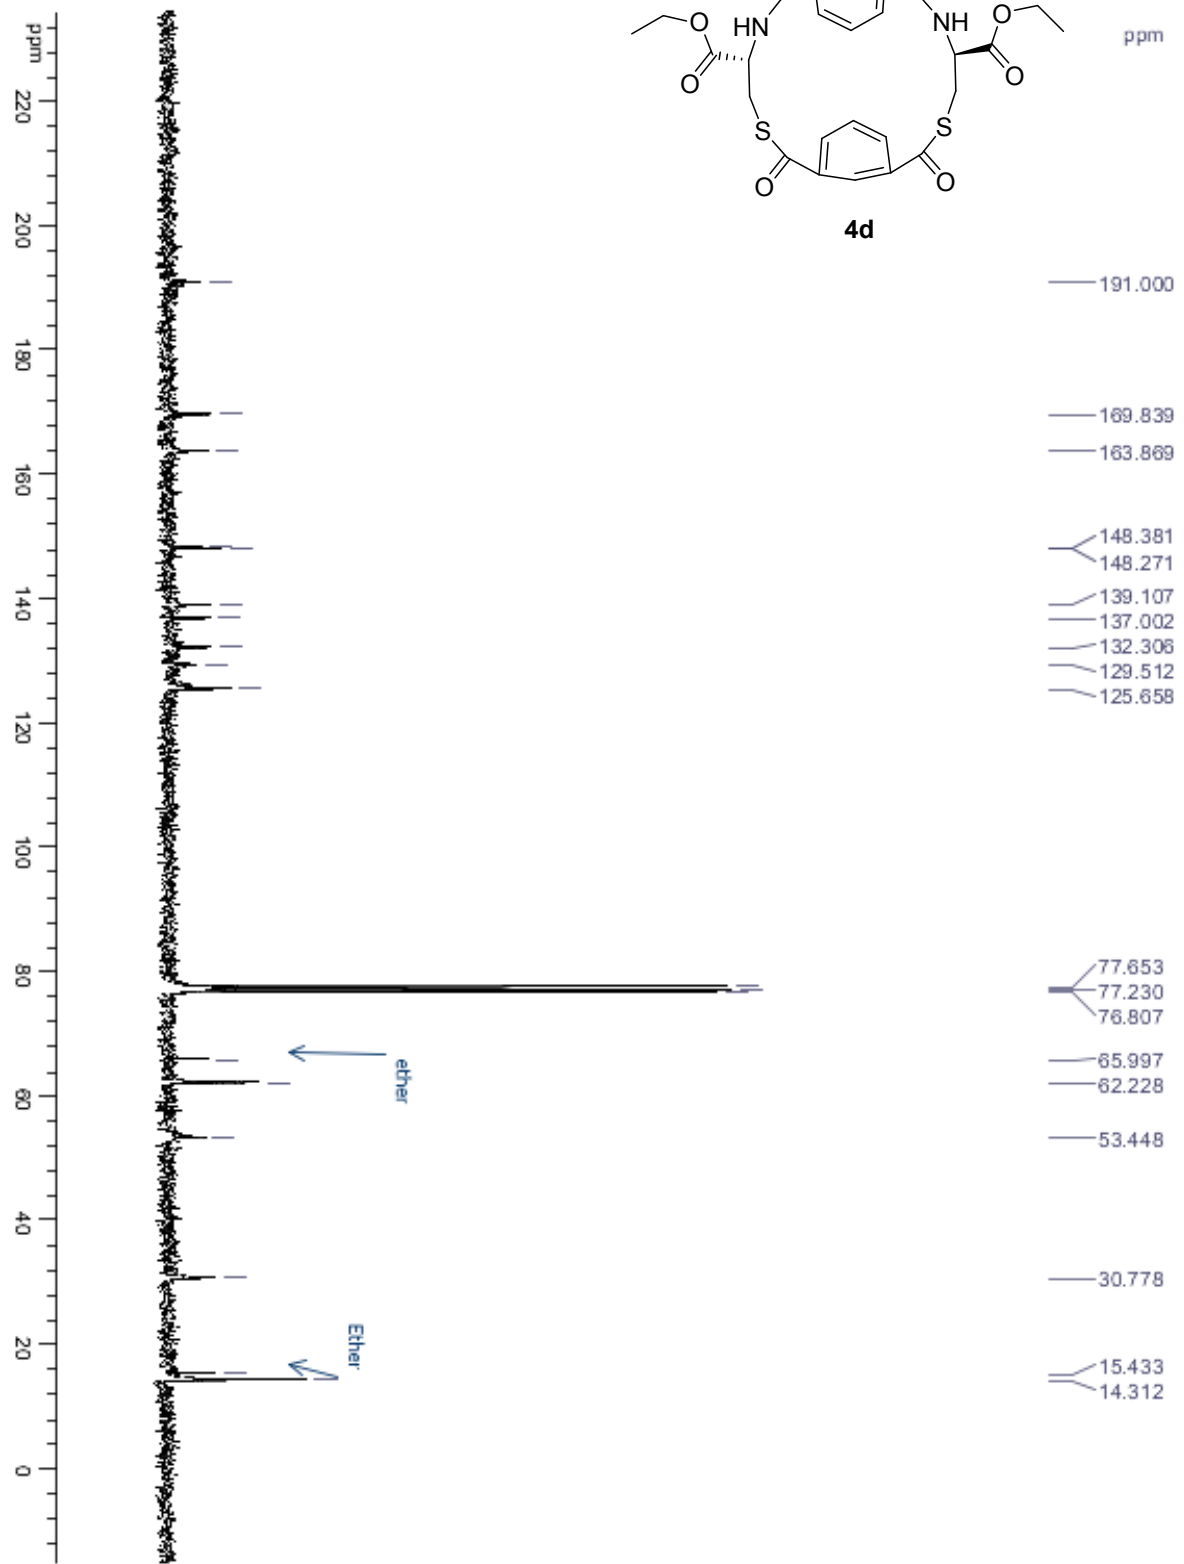

EAGER 200 Stripchart

Sample Ident. : 23 <sup>phthalic</sup> ~~mucoic~~ ~~phthalic~~ ethyl      Filename : 269423  
 Analysed : 04-25-12 08:12:19      Printed : 04-25-2012 08:22:21

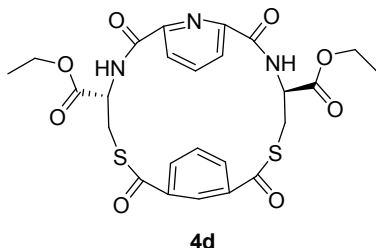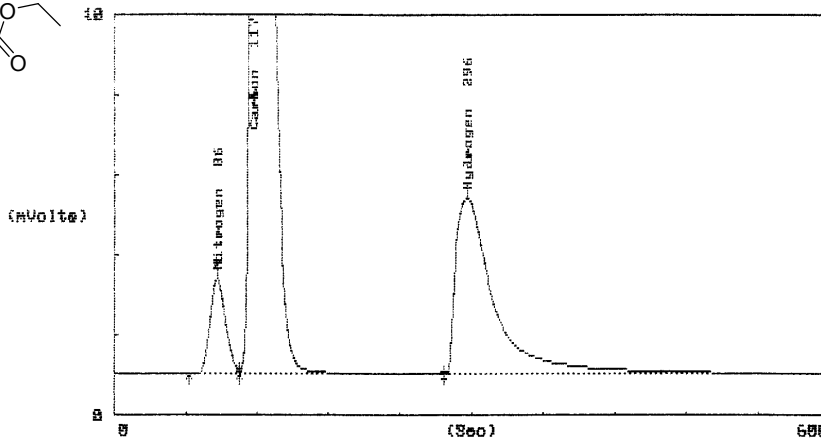

EAGER 200 Peak Integration Report

Instrument name : Instrument #1      Bline drift (fV): 6.8  
 Company Name : U of Florida      Operator Ident. : KOU  
 Analysed : 04-25-12 08:12:19      Printed : 04-25-2012 08:22:22  
 Sample Ident. : 23 1985-01      Filename : 269423  
 Sample Weight : 2.111      Calc.method: using 'K. Factors'

| No. (#) | Type (#) | Start (Sec) | End (Sec) | Ret Time (Sec) | Height (fV) | Area (fV*Sec) | Area % (%) | Name     |
|---------|----------|-------------|-----------|----------------|-------------|---------------|------------|----------|
| 1       | FU       | 63          | 105       | 86             | 2391.2      | 34425         | 3.82       | Nitrogen |
| 2       | FU       | 105         | 277       | 117            | 44233.0     | 696815        | 77.23      | Carbon   |
| 3       | RS       | 277         | 597       | 296            | 4385.9      | 171012        | 18.95      | Hydrogen |
|         |          |             |           |                |             |               | 902252     | 100.00   |

EAGER 200 Unk Report

Instrument name : Instrument #1      Bline drift (fV): 6.8  
 Company Name : U of Florida      Operator Ident. : KOU  
 Analysed : 04-25-12 08:12:19      Printed : 04-25-2012 08:22:22  
 Sample Ident. : 23 1985-01      Filename : 269423  
 Sample Weight : 2.111      Calc.method: using 'K. Factors'

| Pk. (#) | Ret Time (Sec) | Area (fV*Sec) | Element % (%) | Area Ratio  | Name     |
|---------|----------------|---------------|---------------|-------------|----------|
| 1       | 86             | 34425         | 7.248         | .202415E+02 | Nitrogen |
| 2       | 117            | 696815        | 53.546        | .100000E+01 | Carbon   |
| 3       | 296            | 171012        | 4.749         | .407465E+01 | Hydrogen |

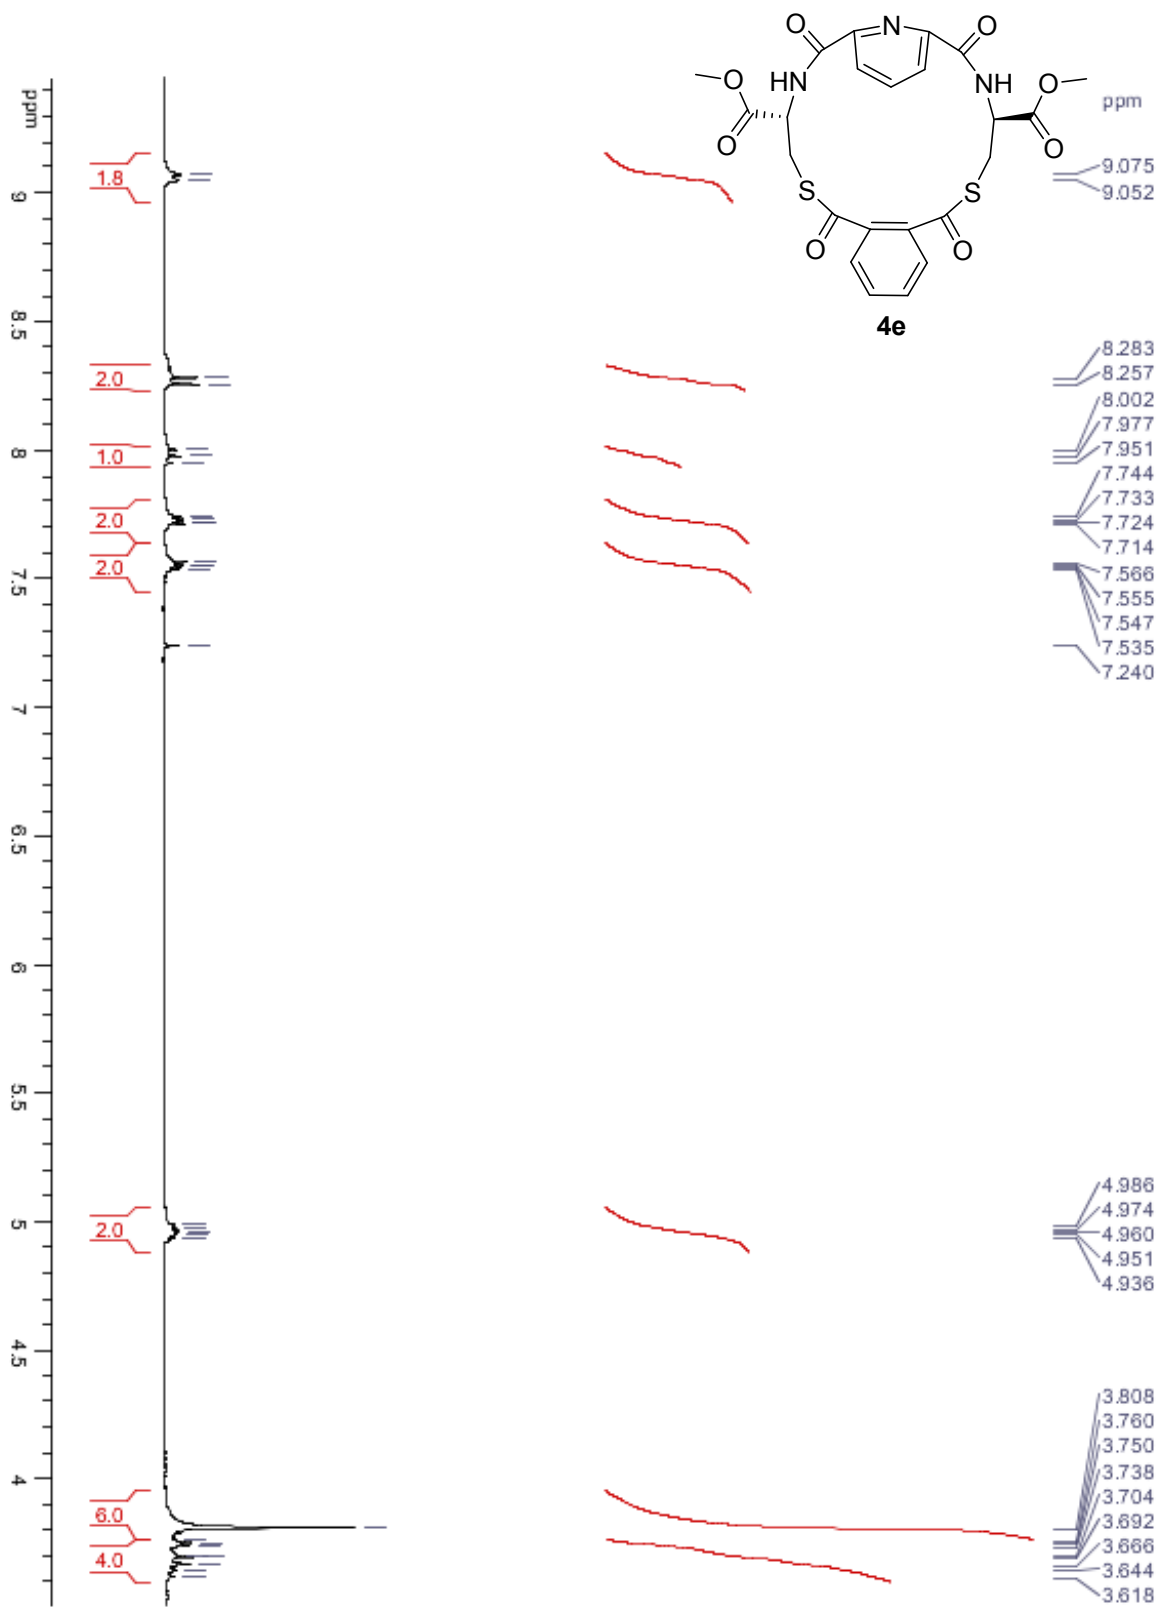

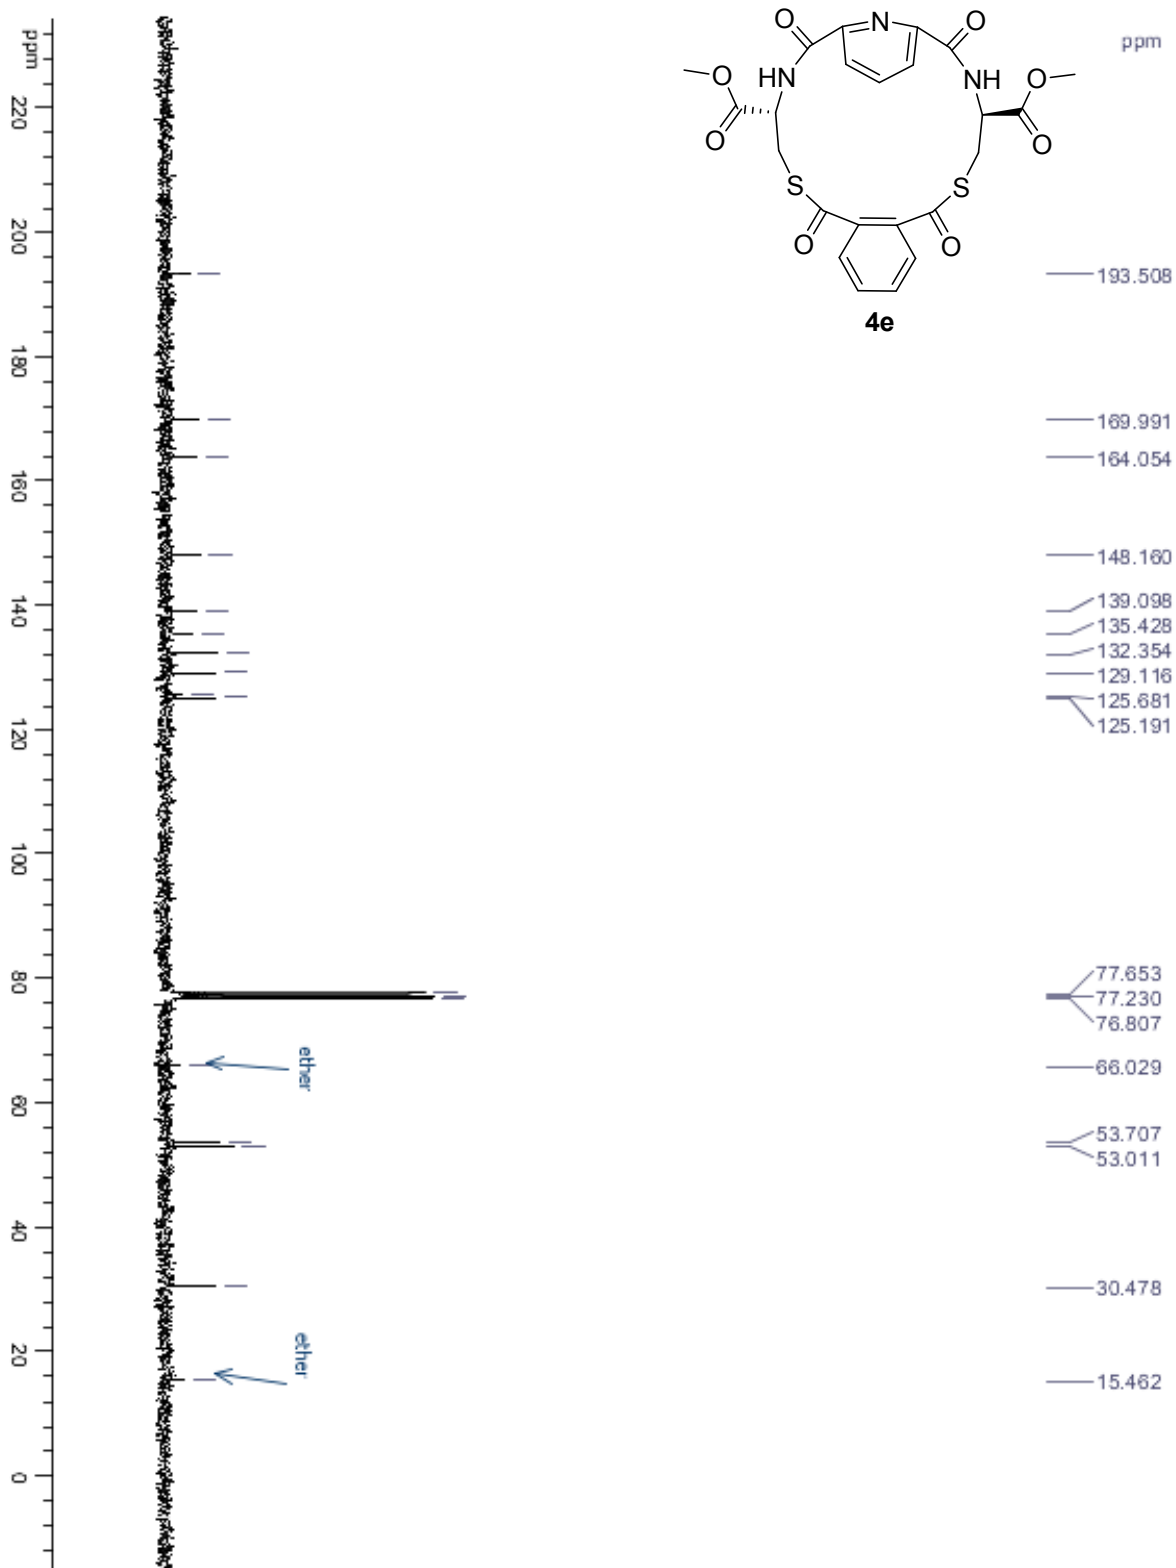

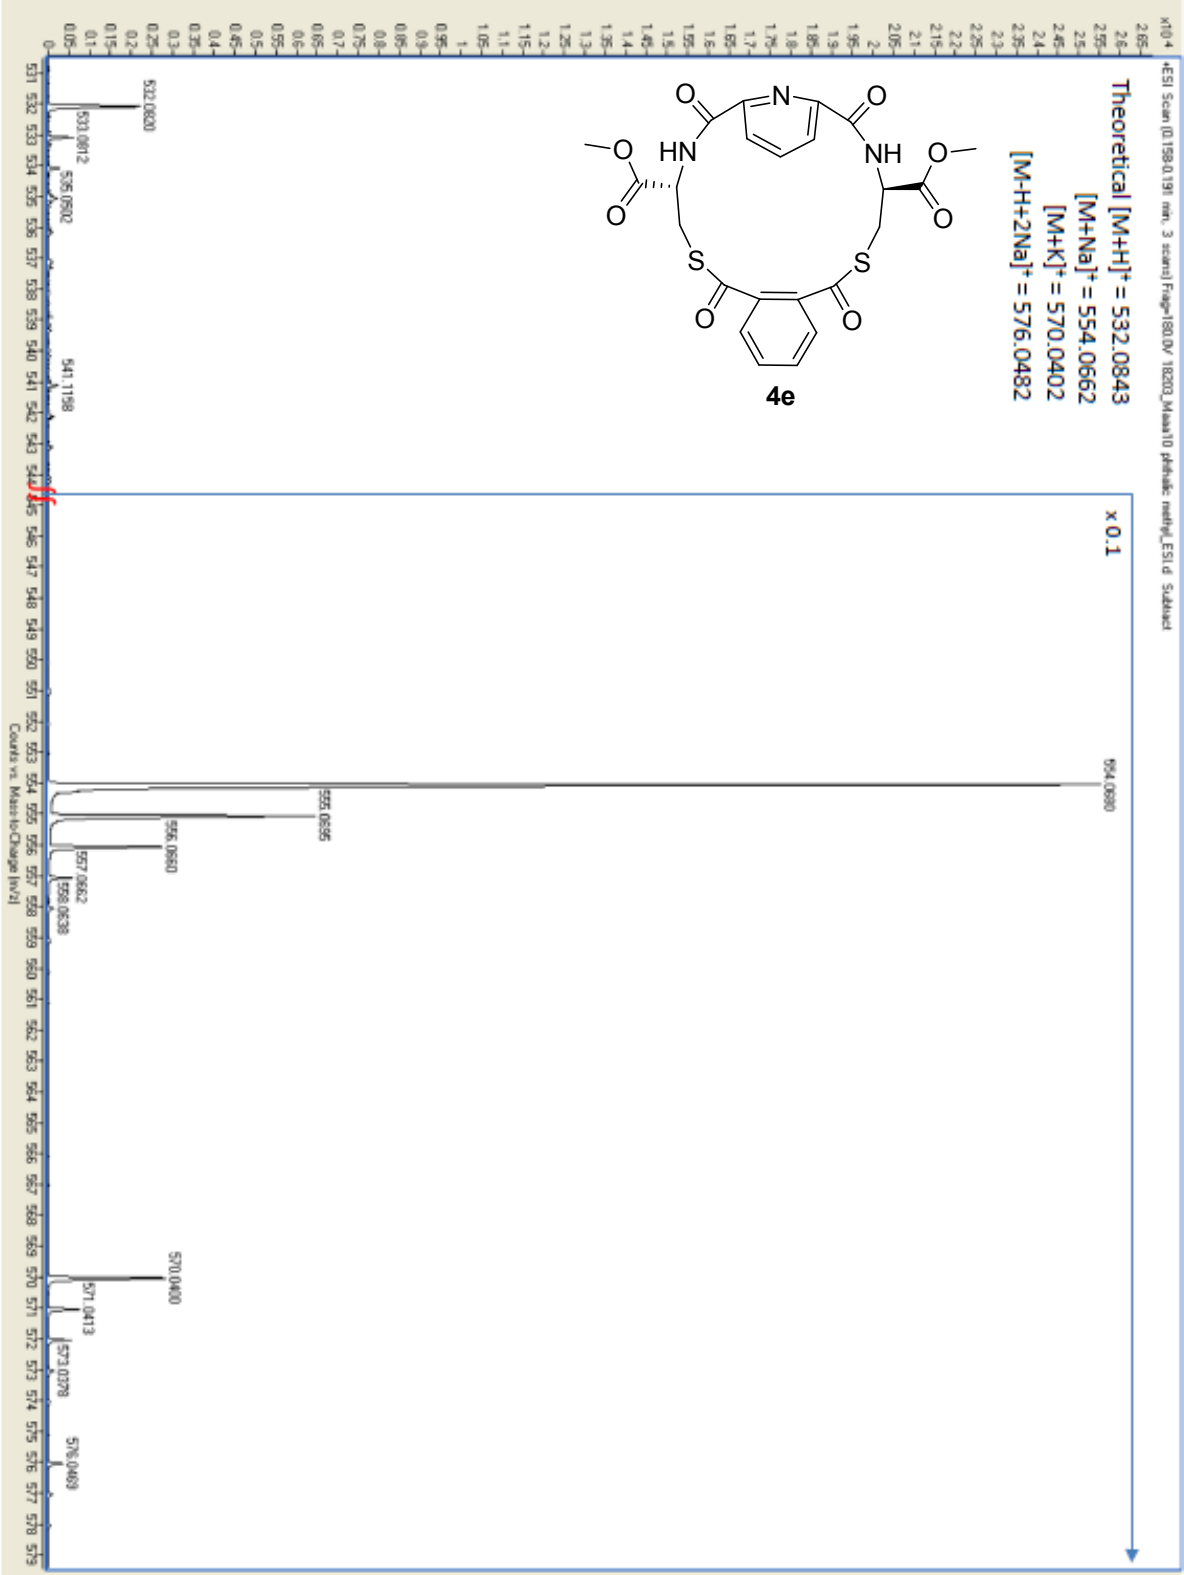

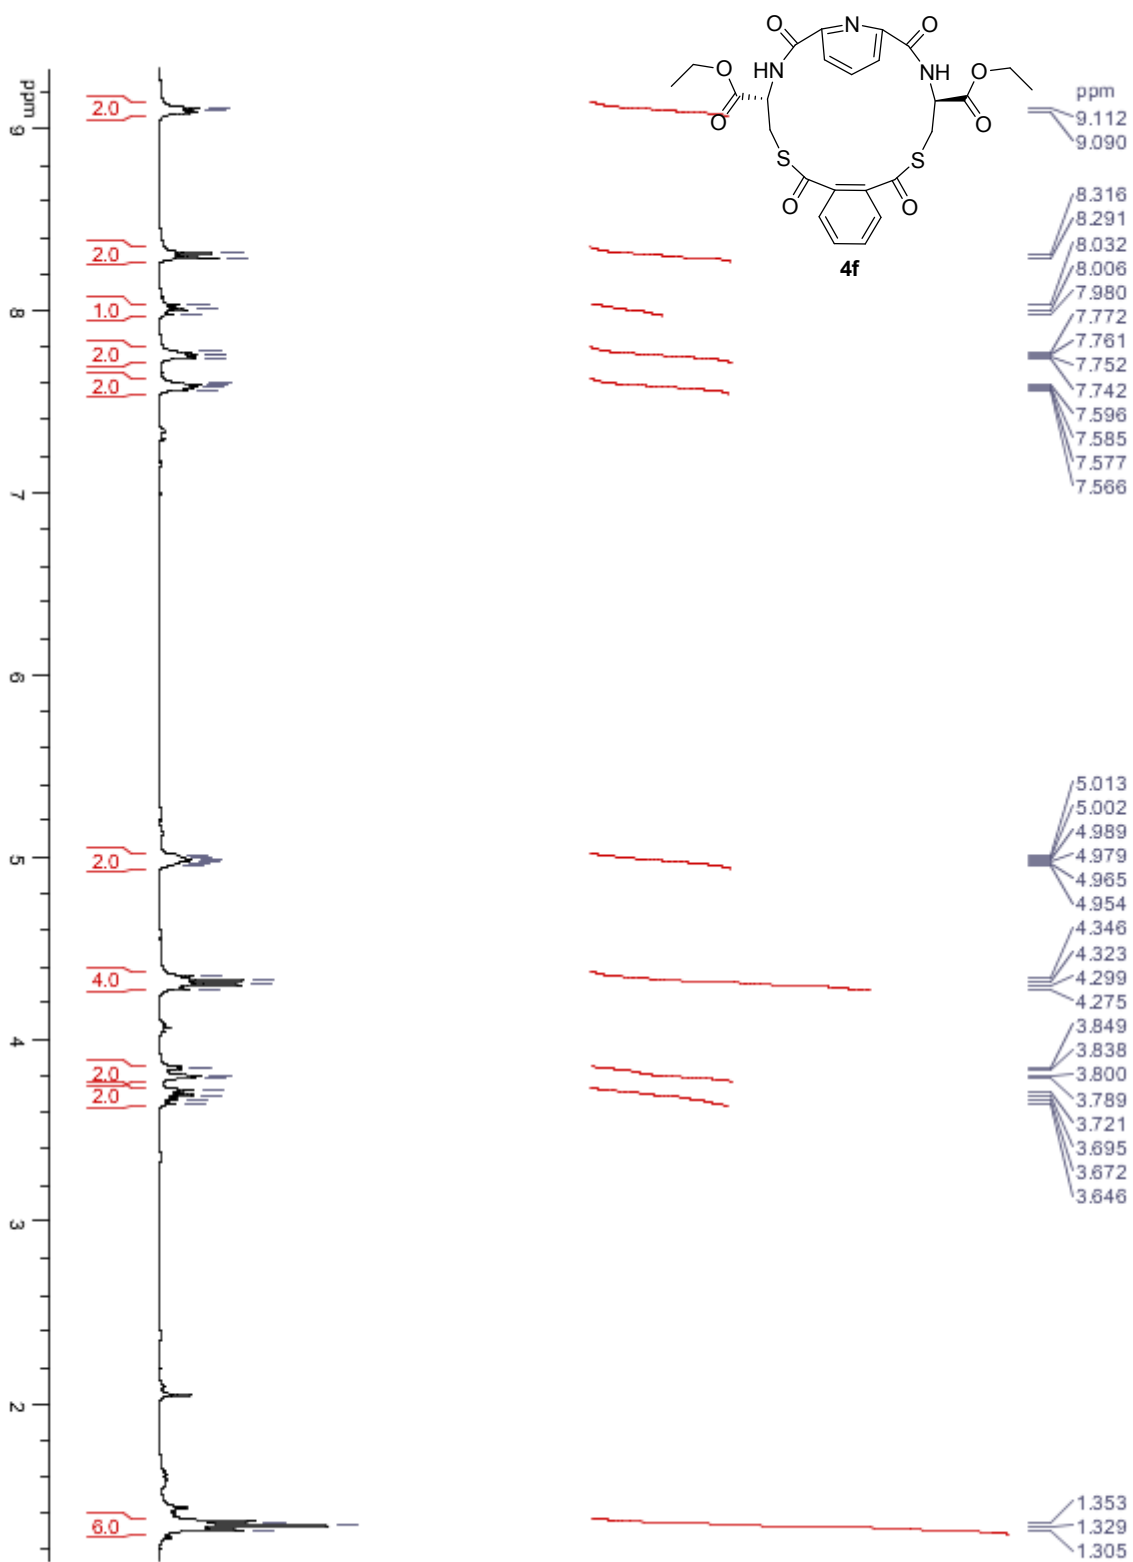



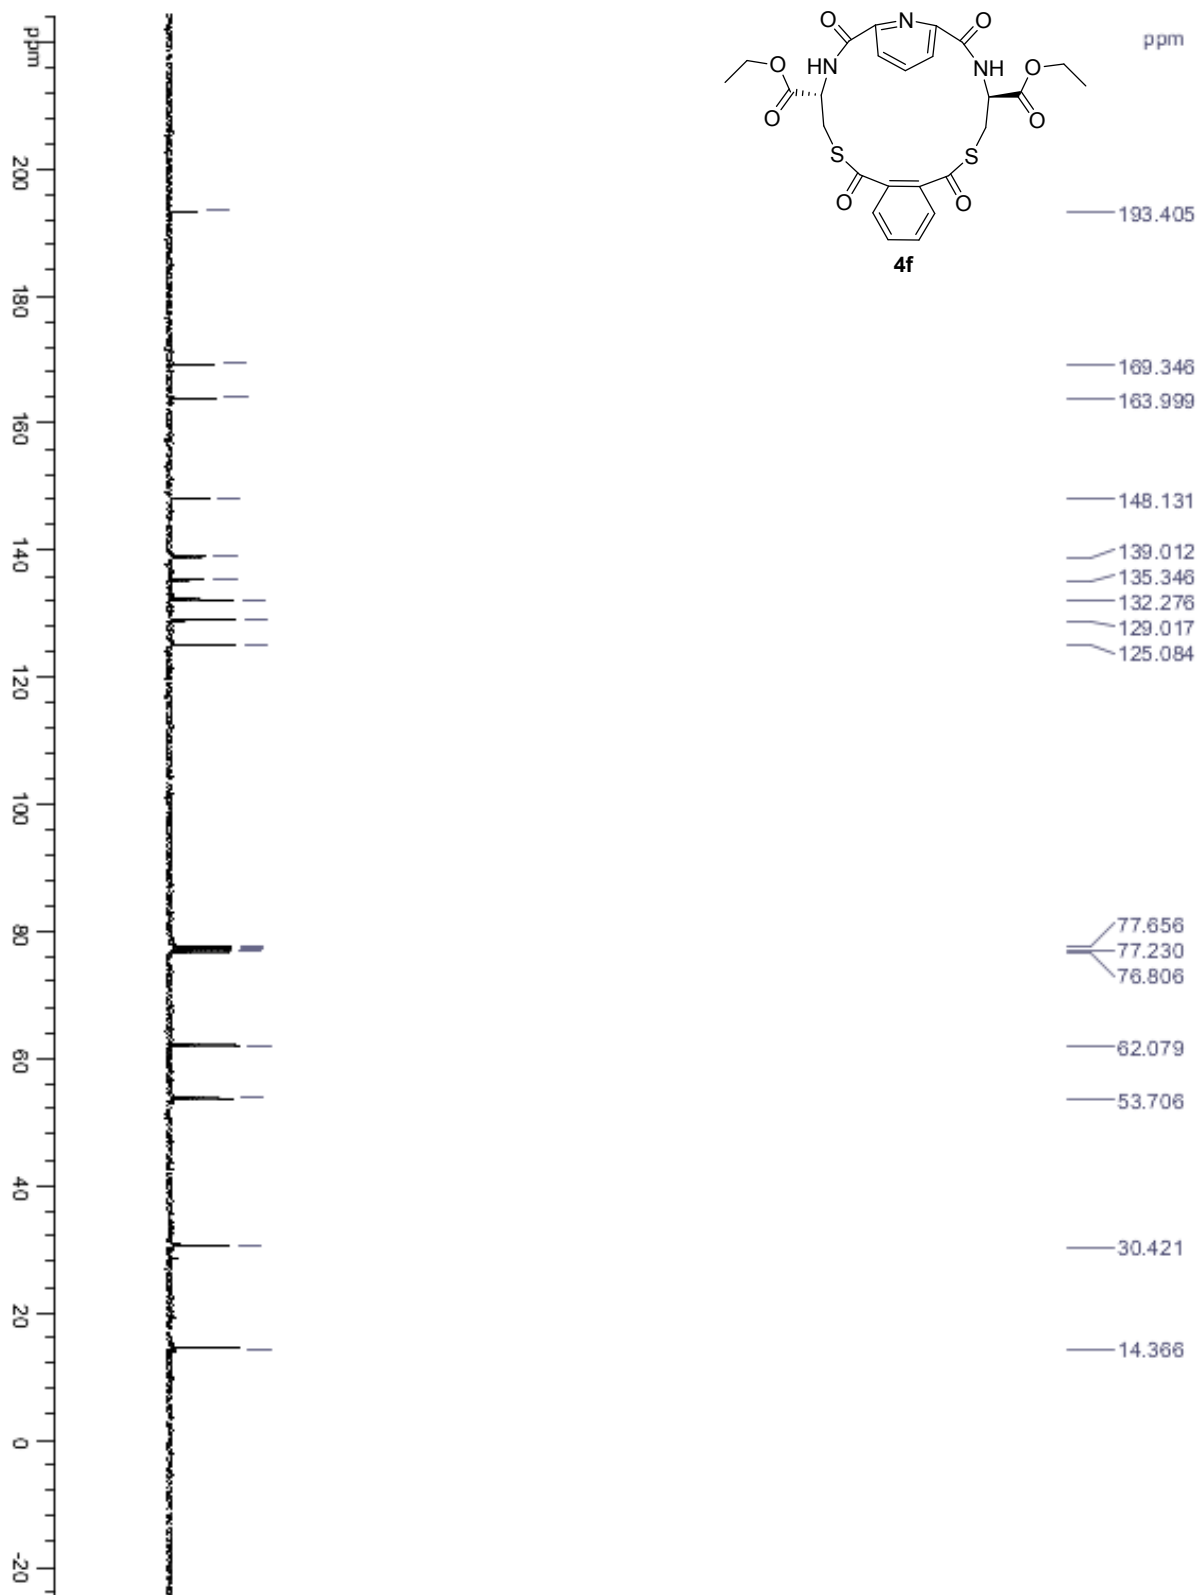

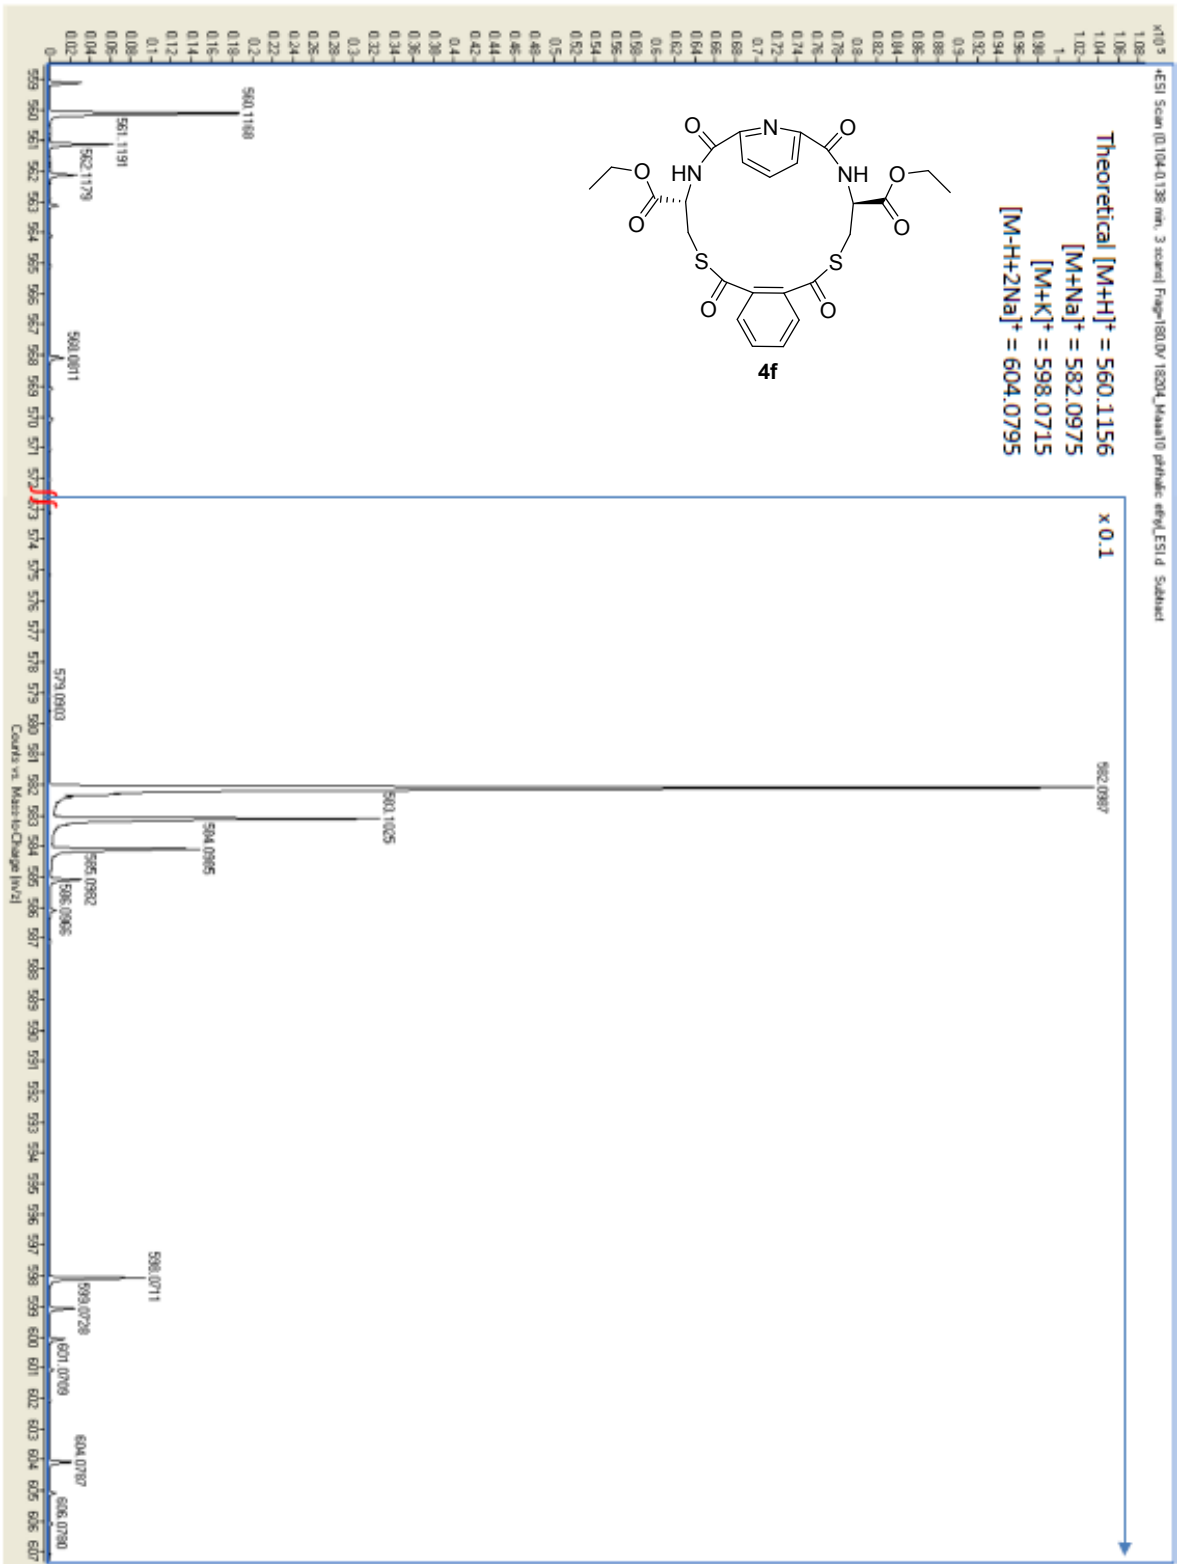

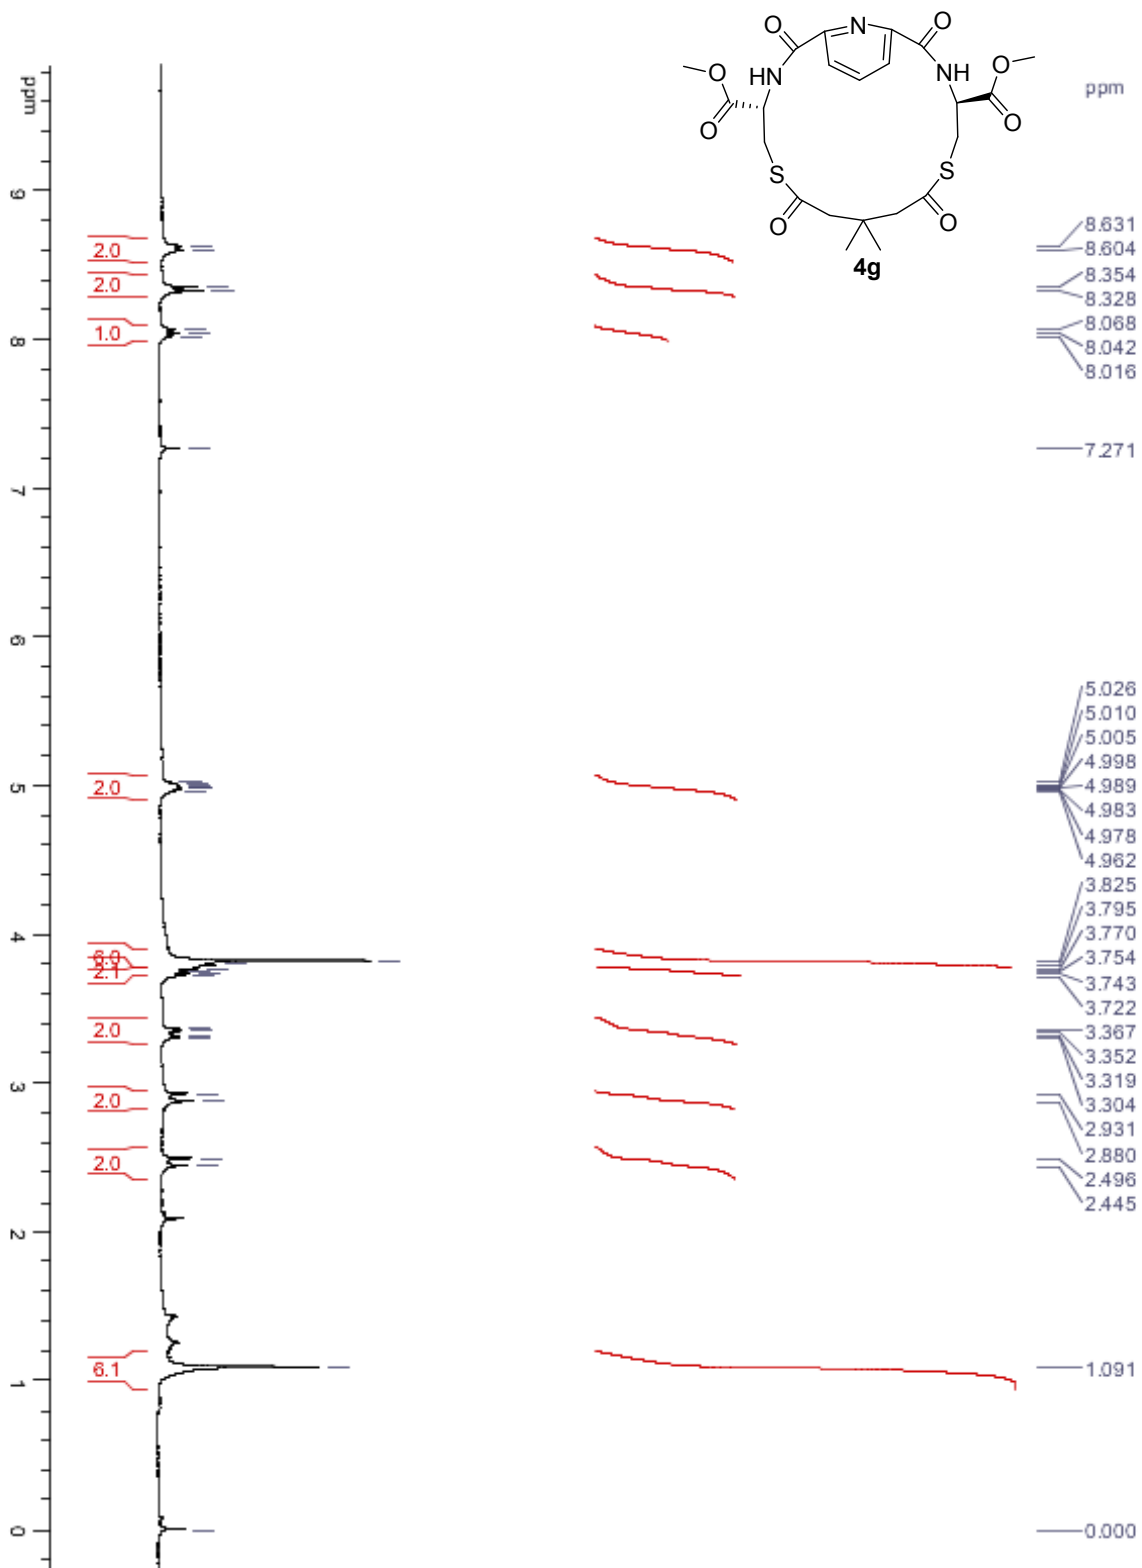

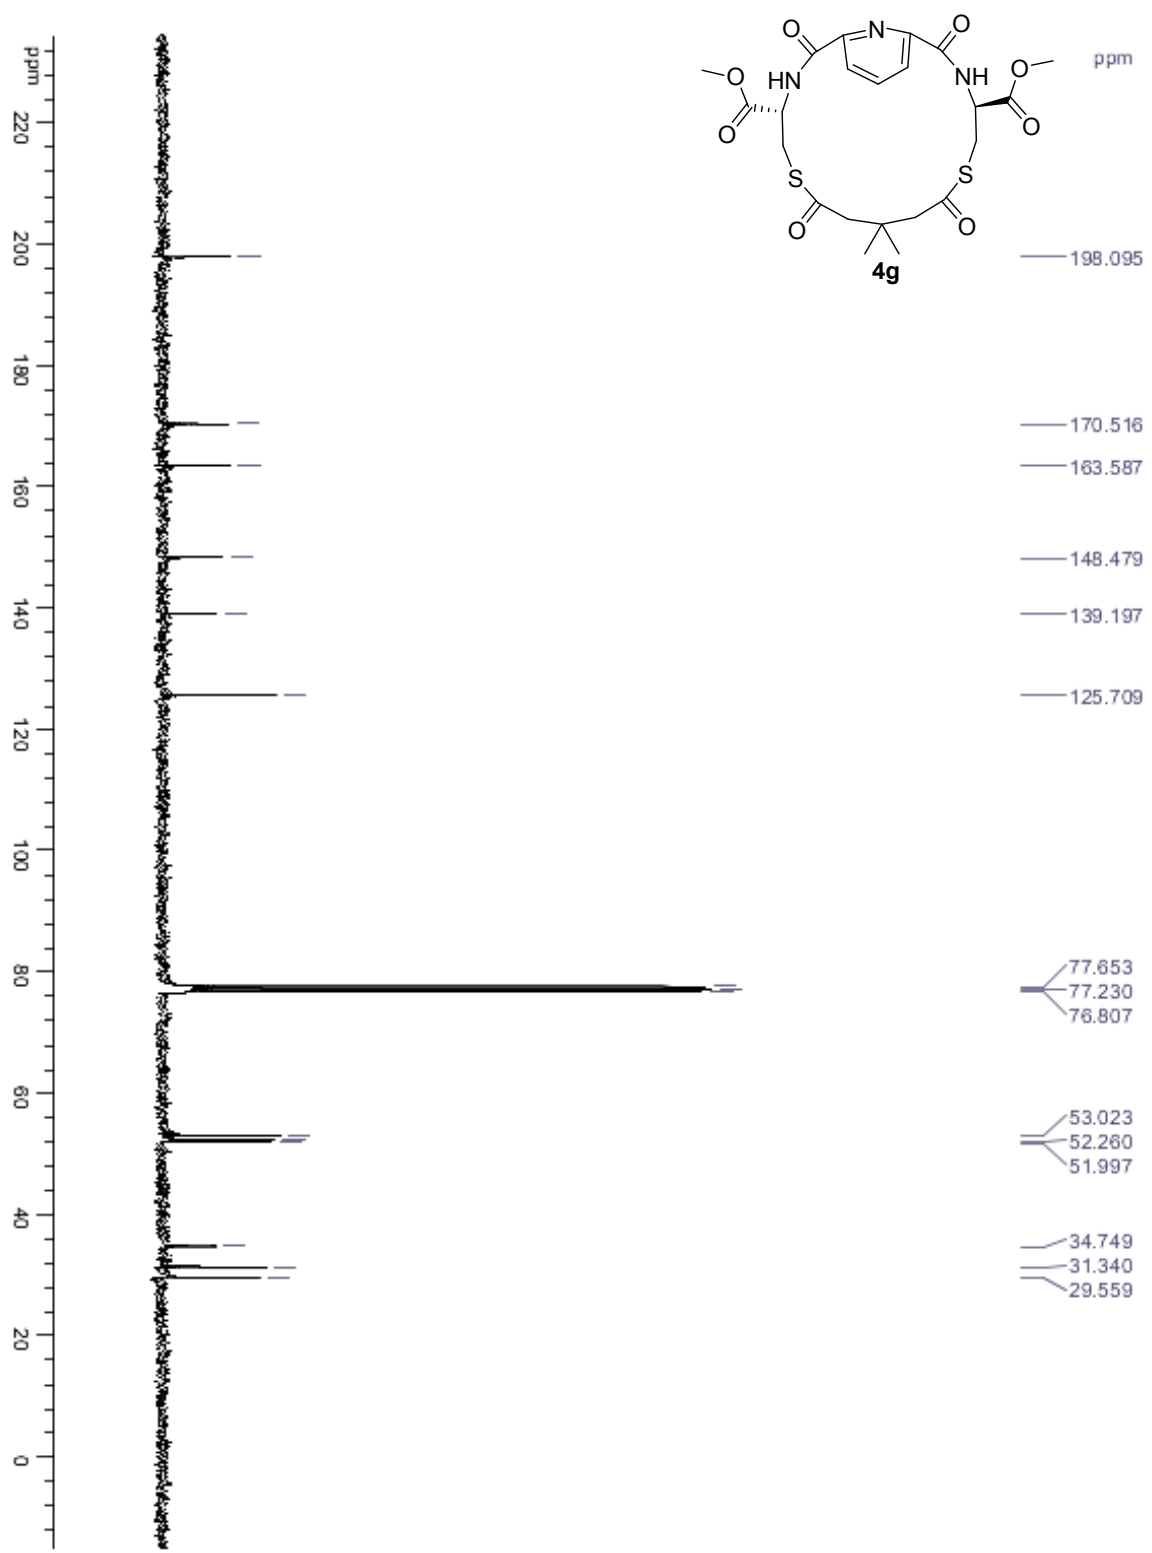

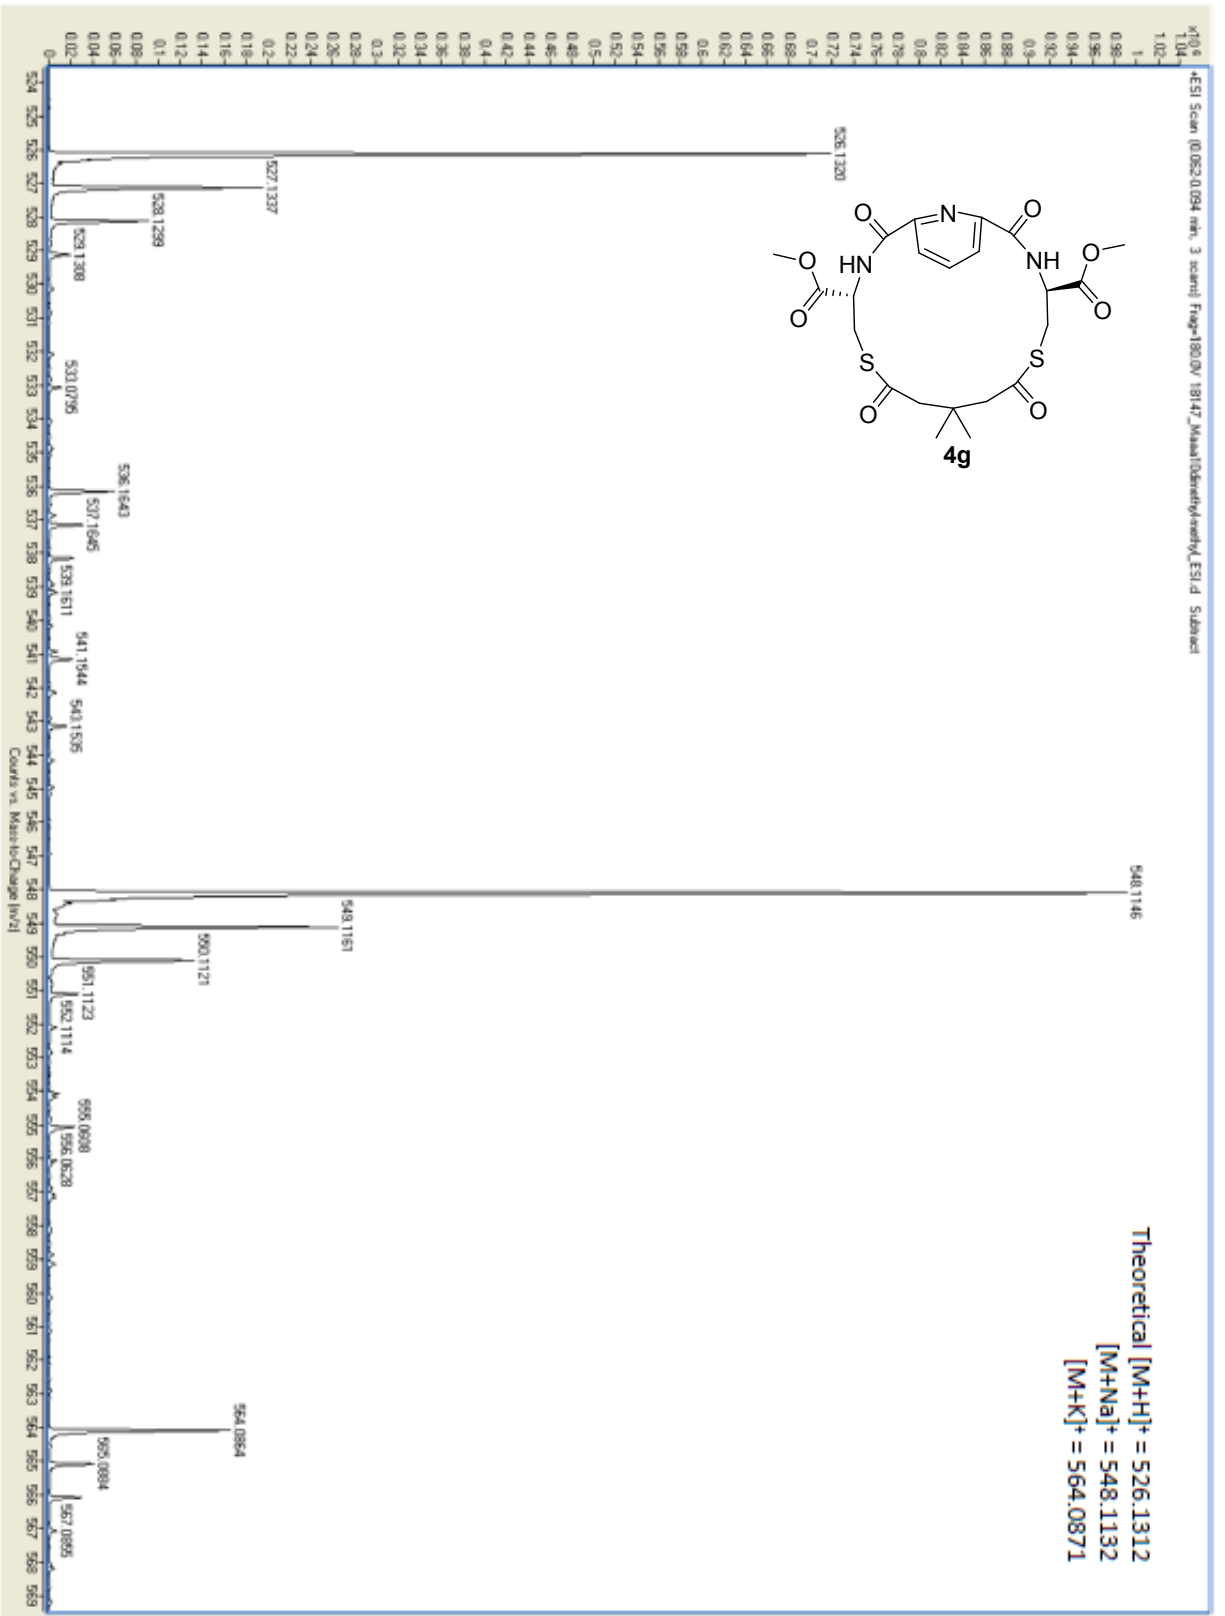

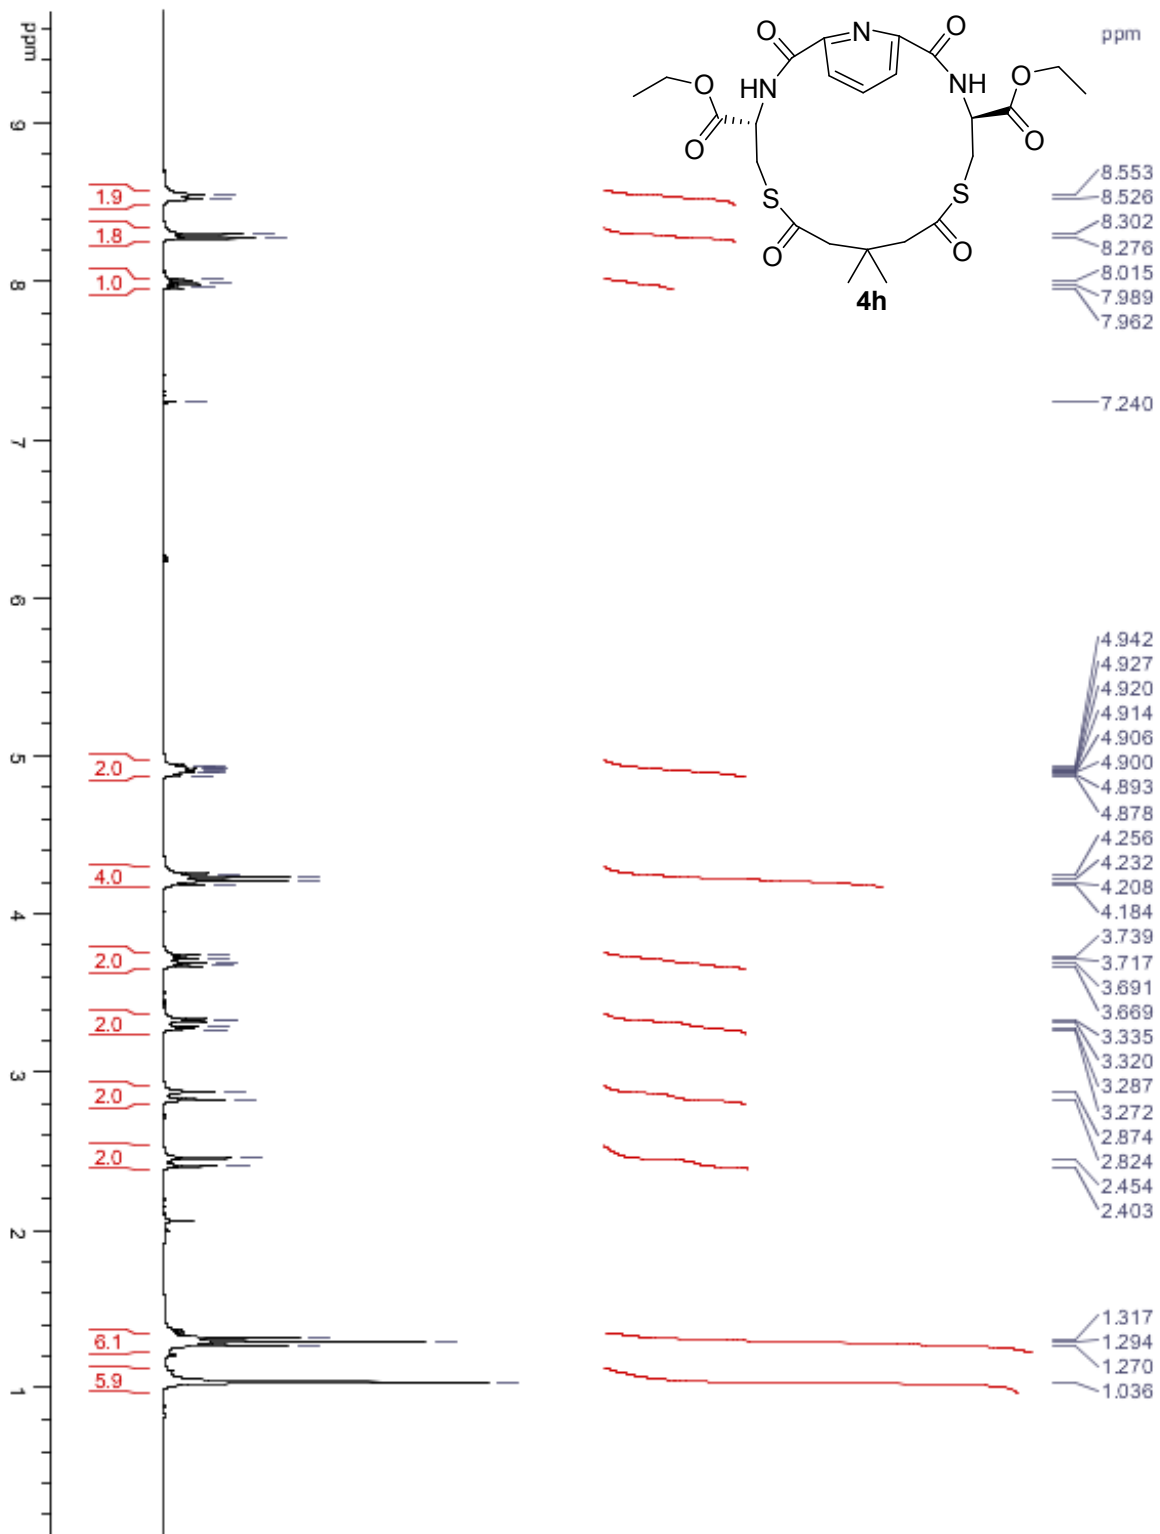

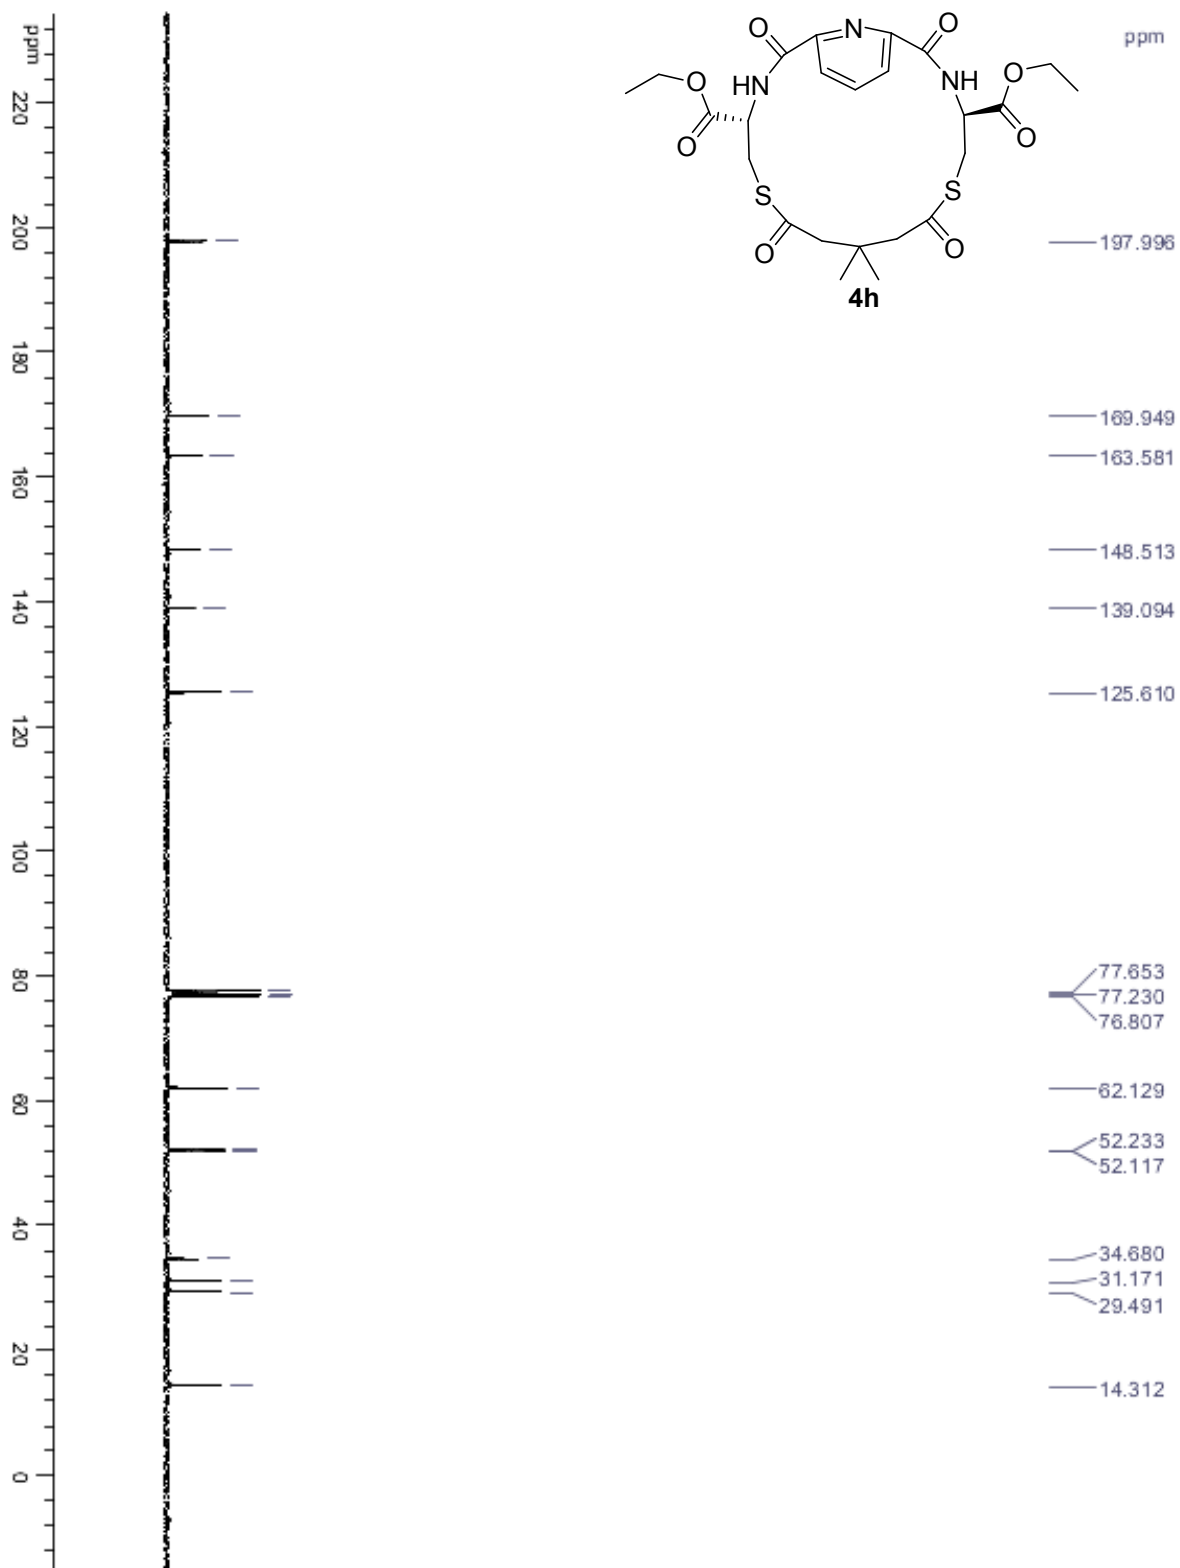

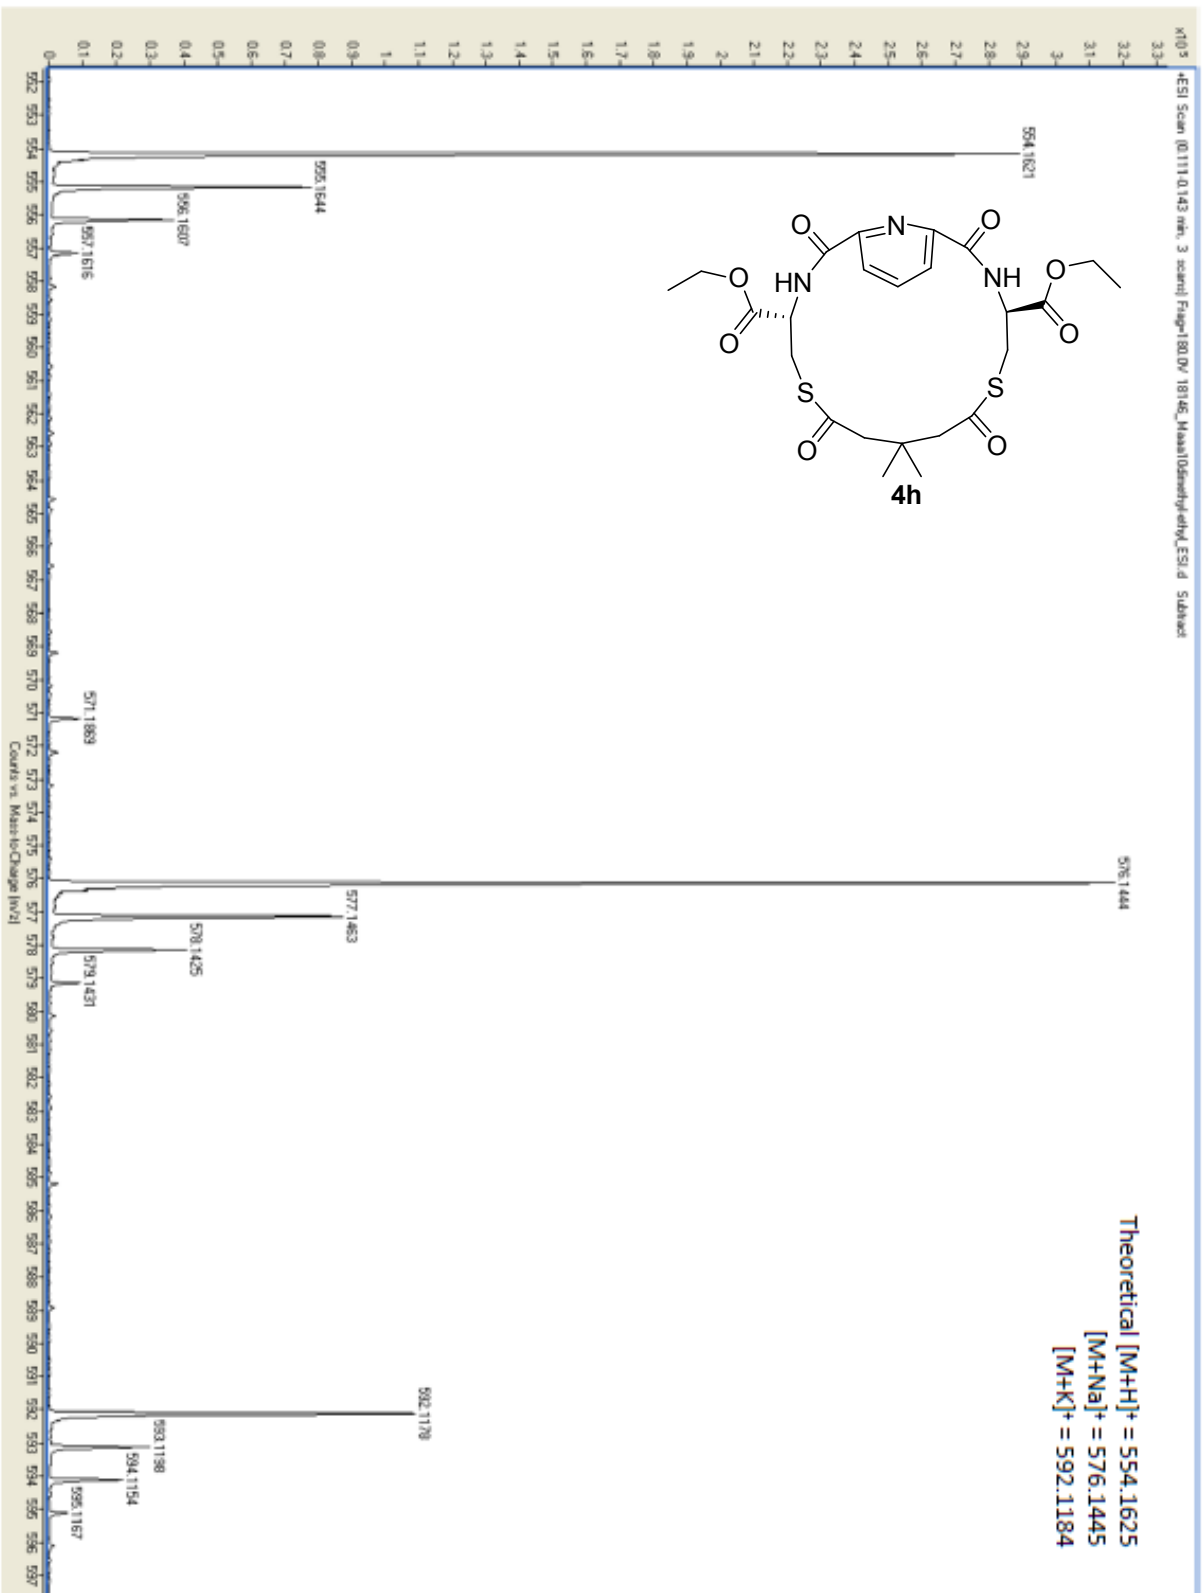



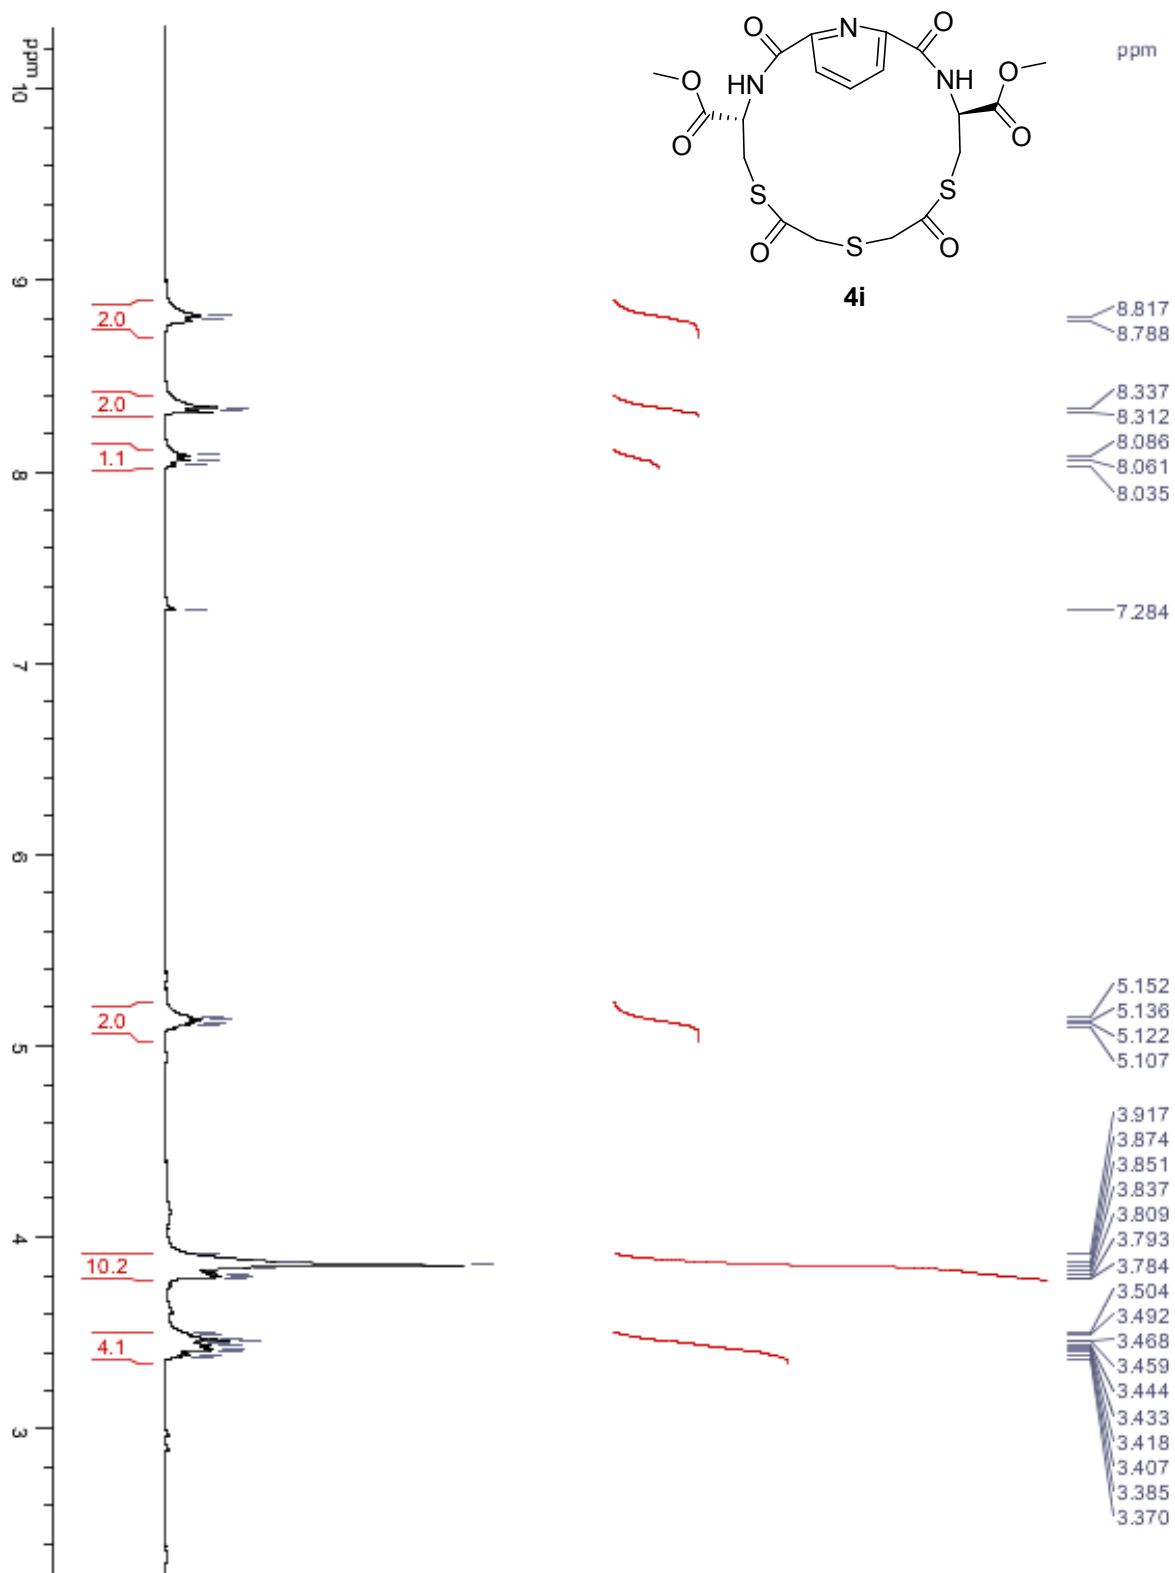

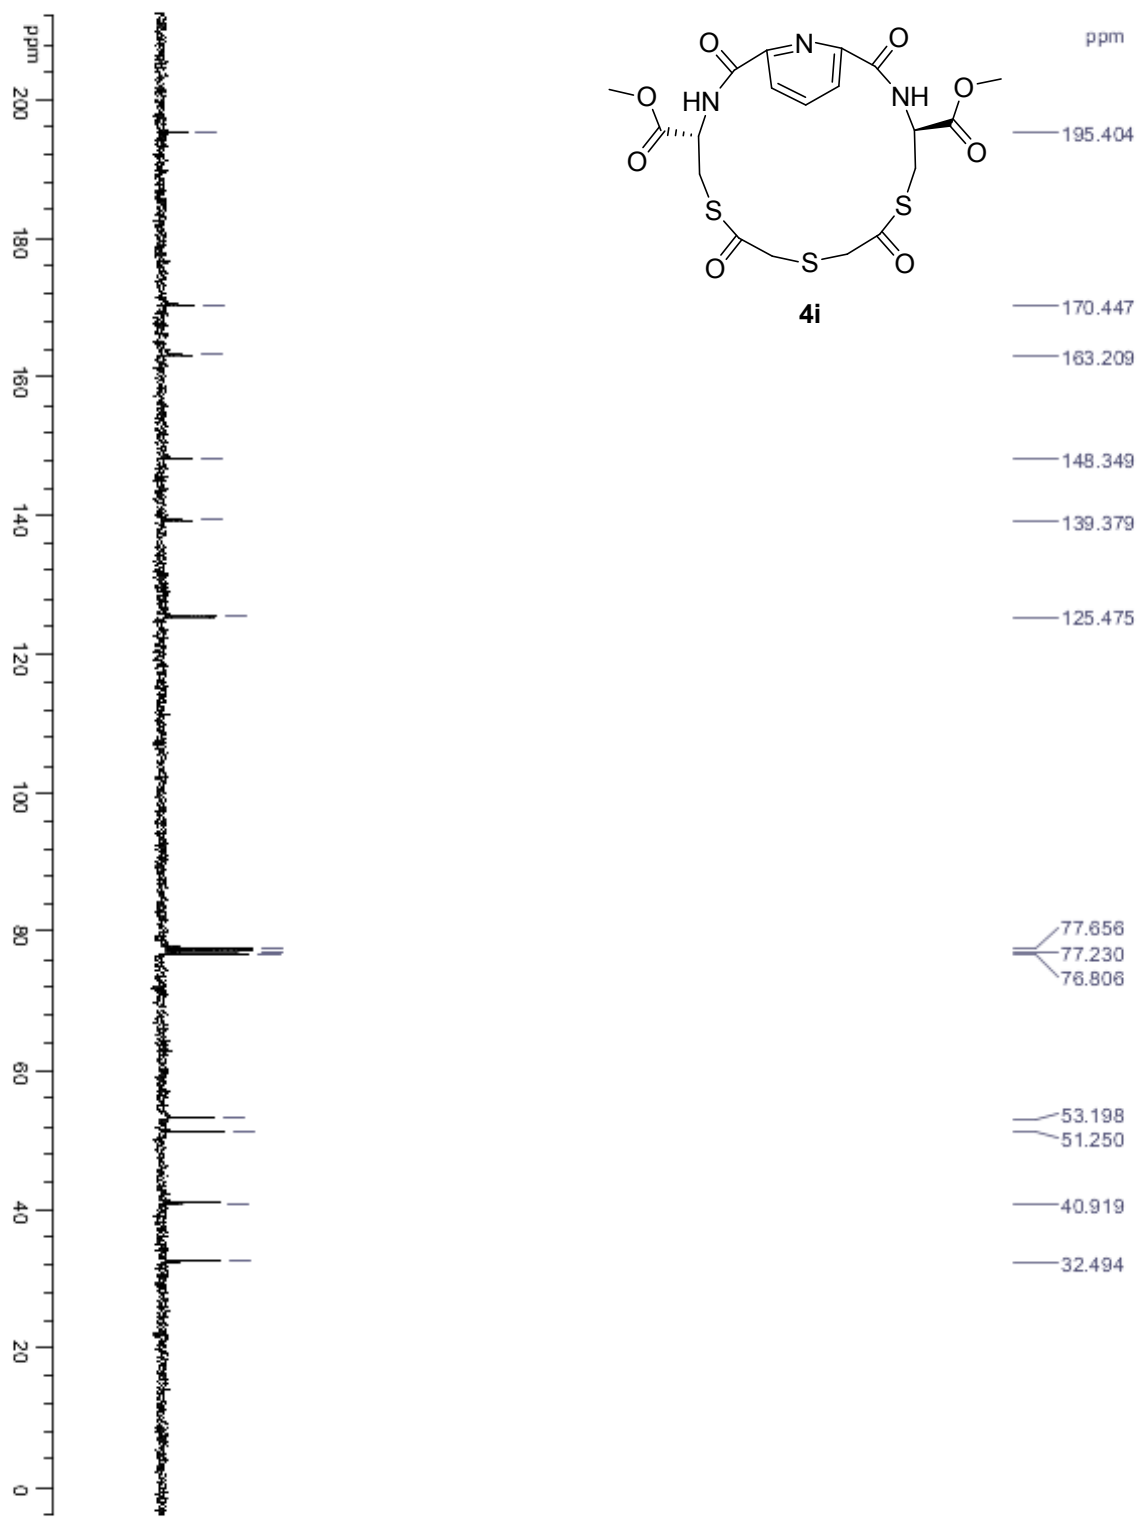

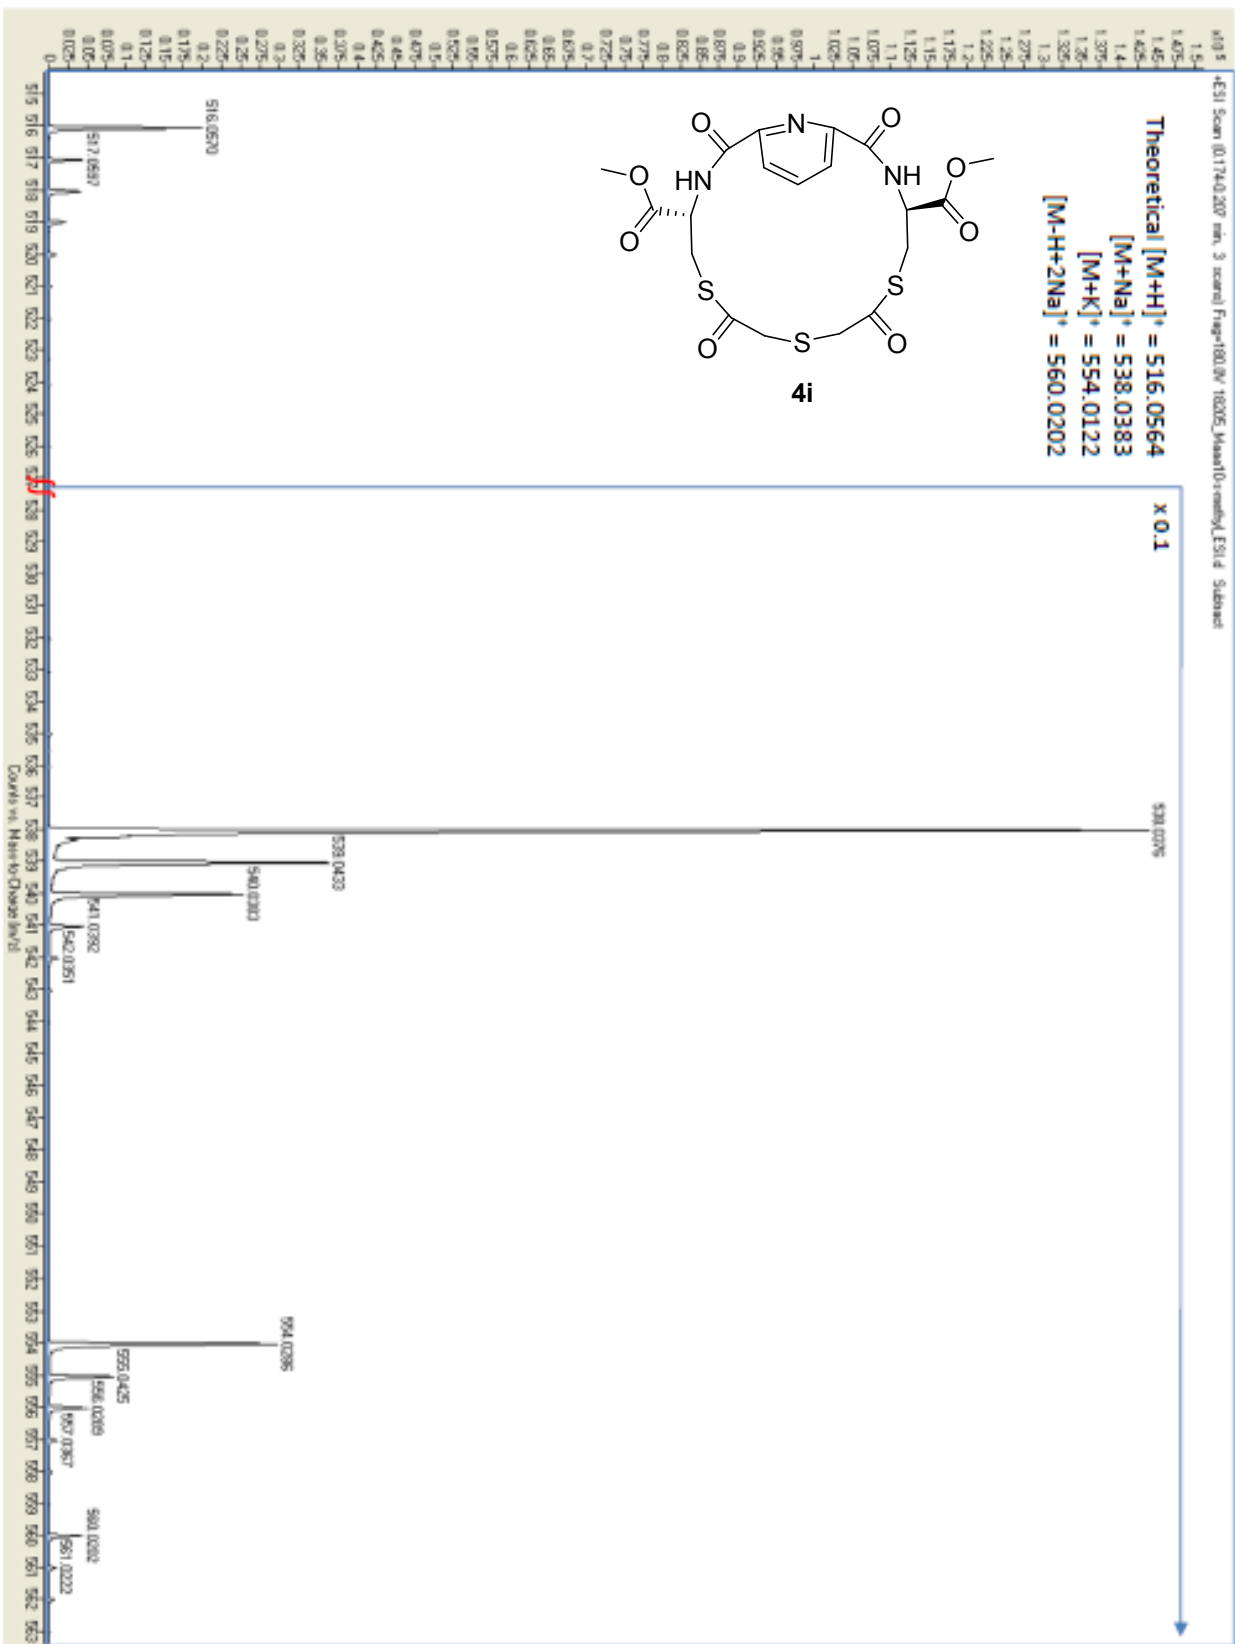

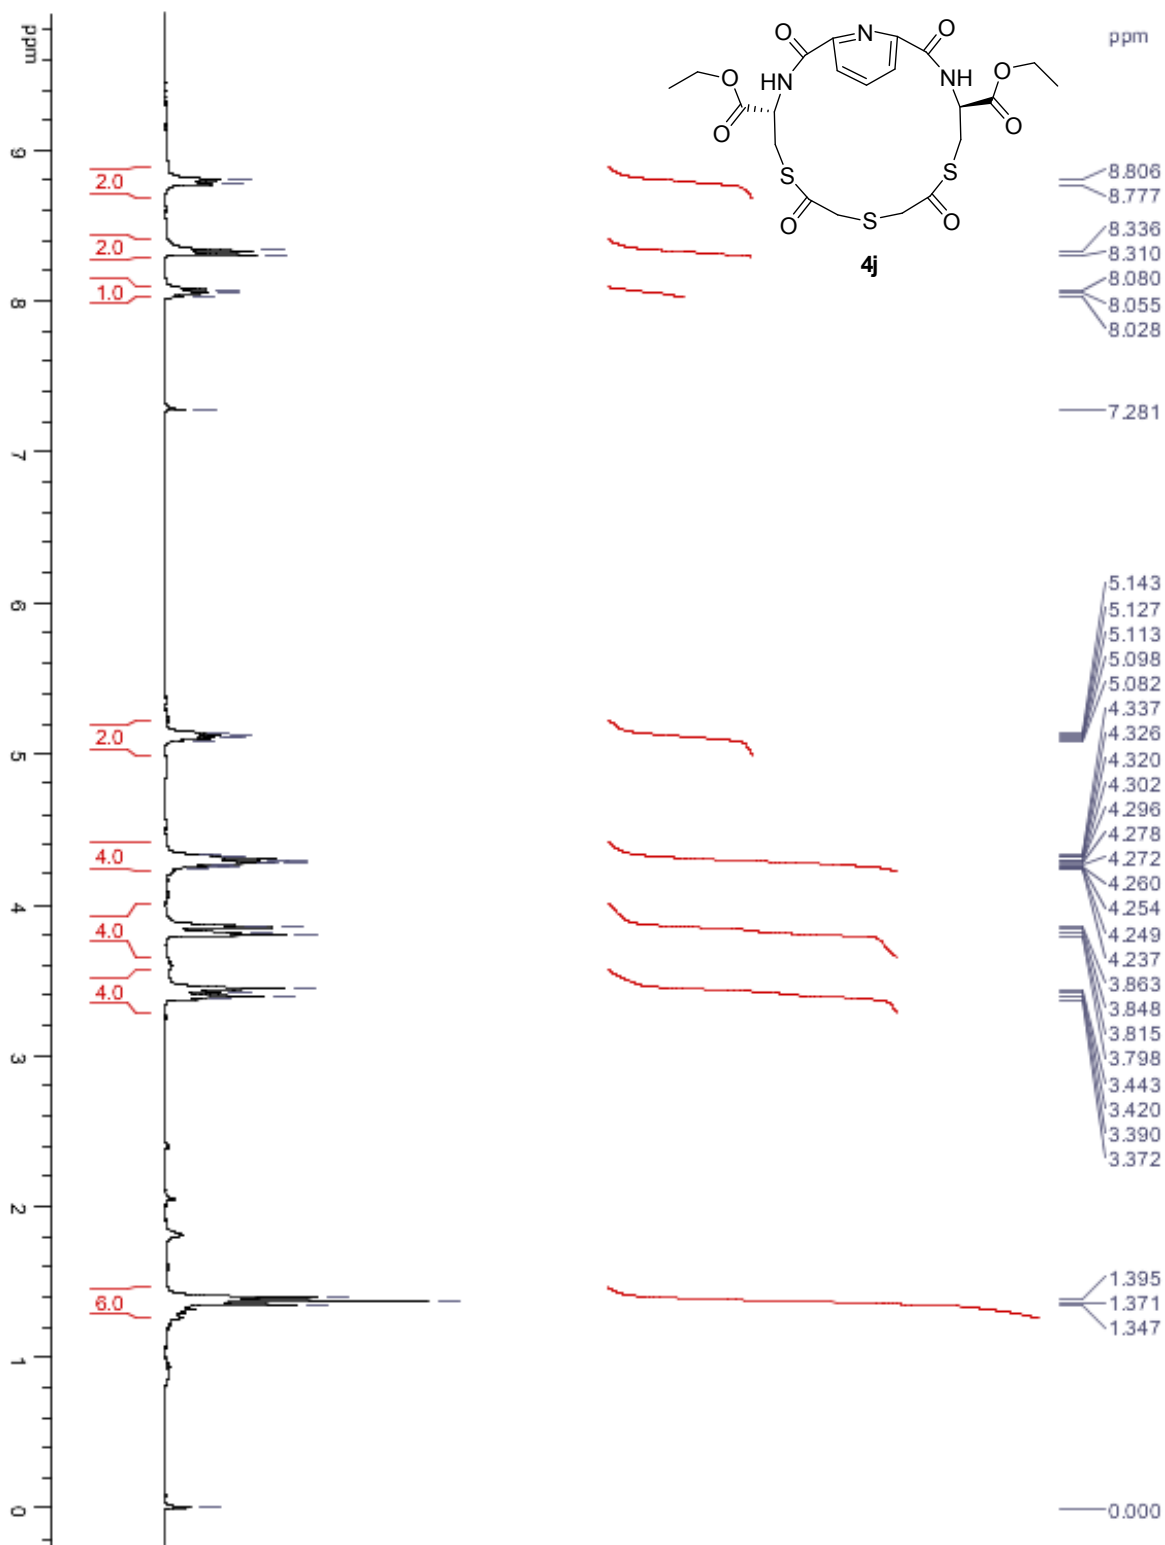

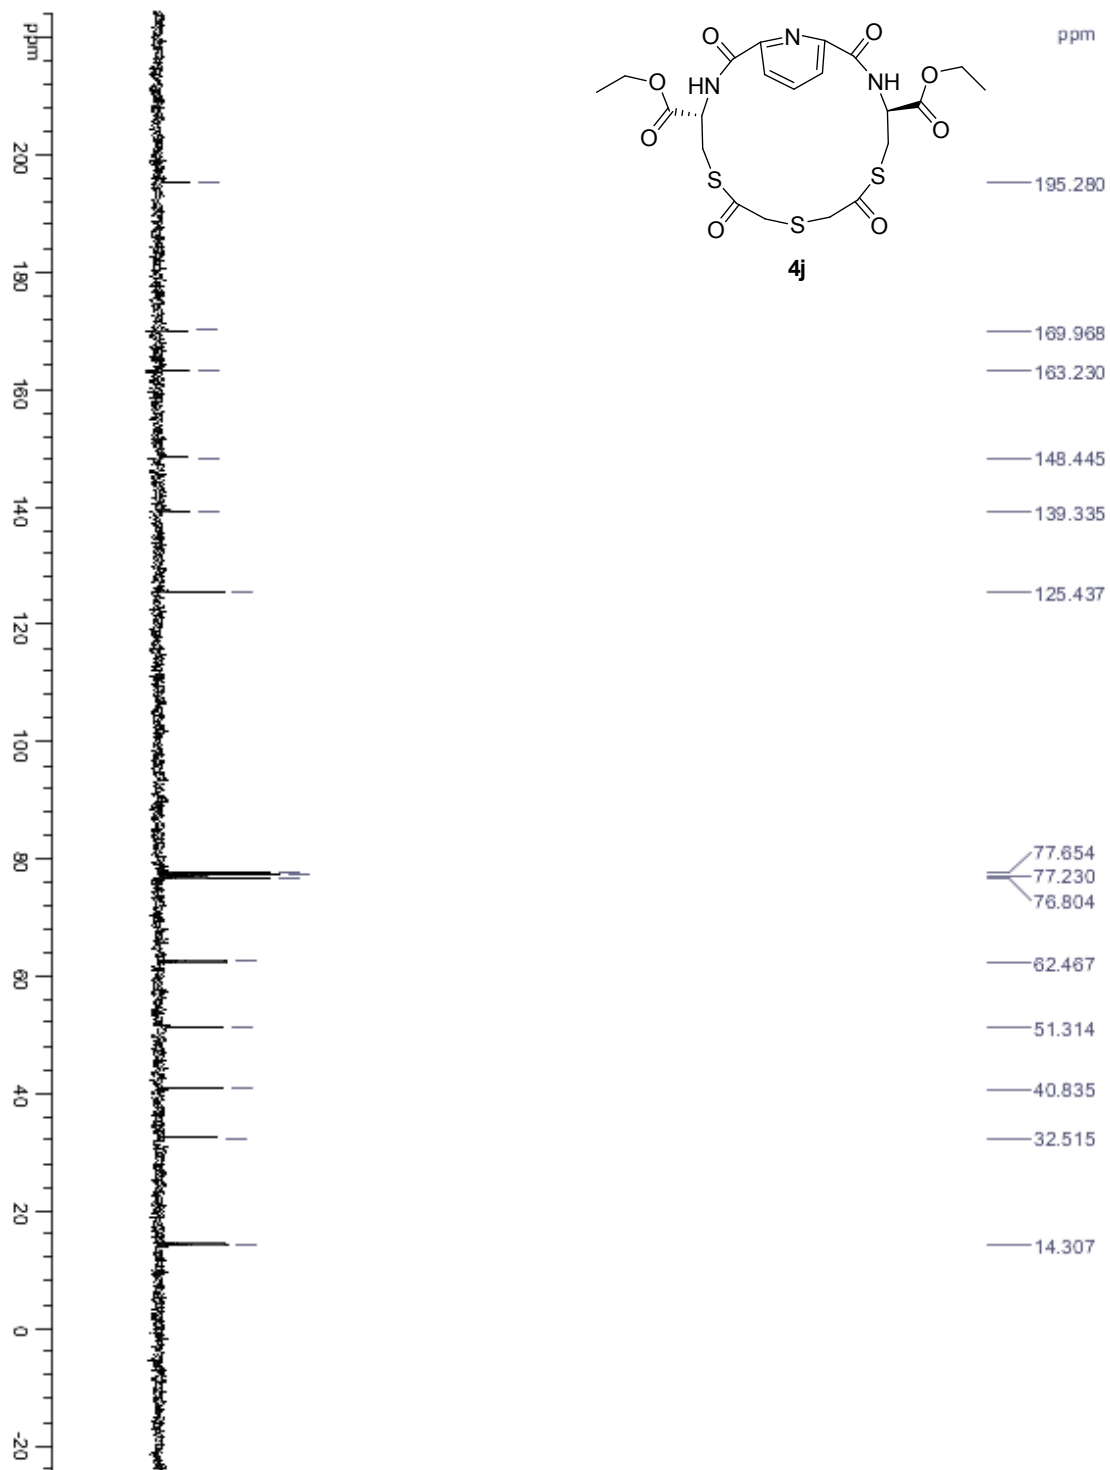

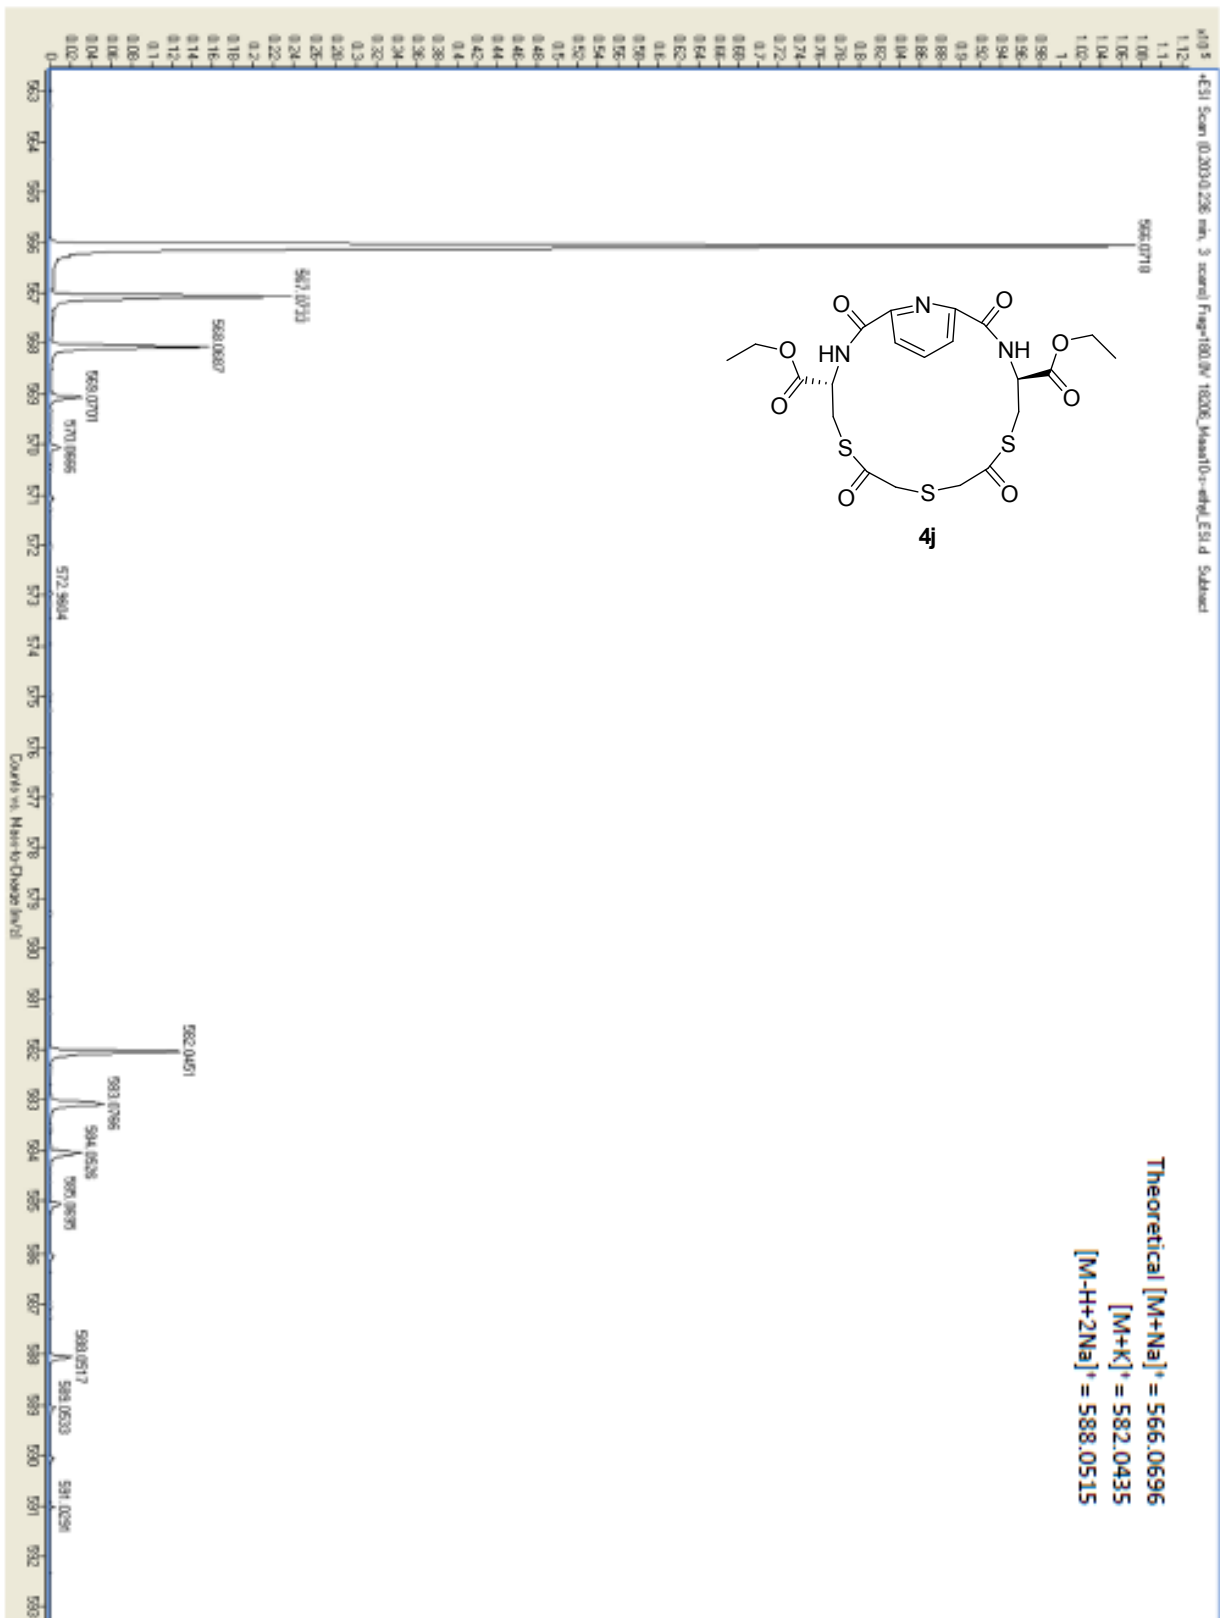

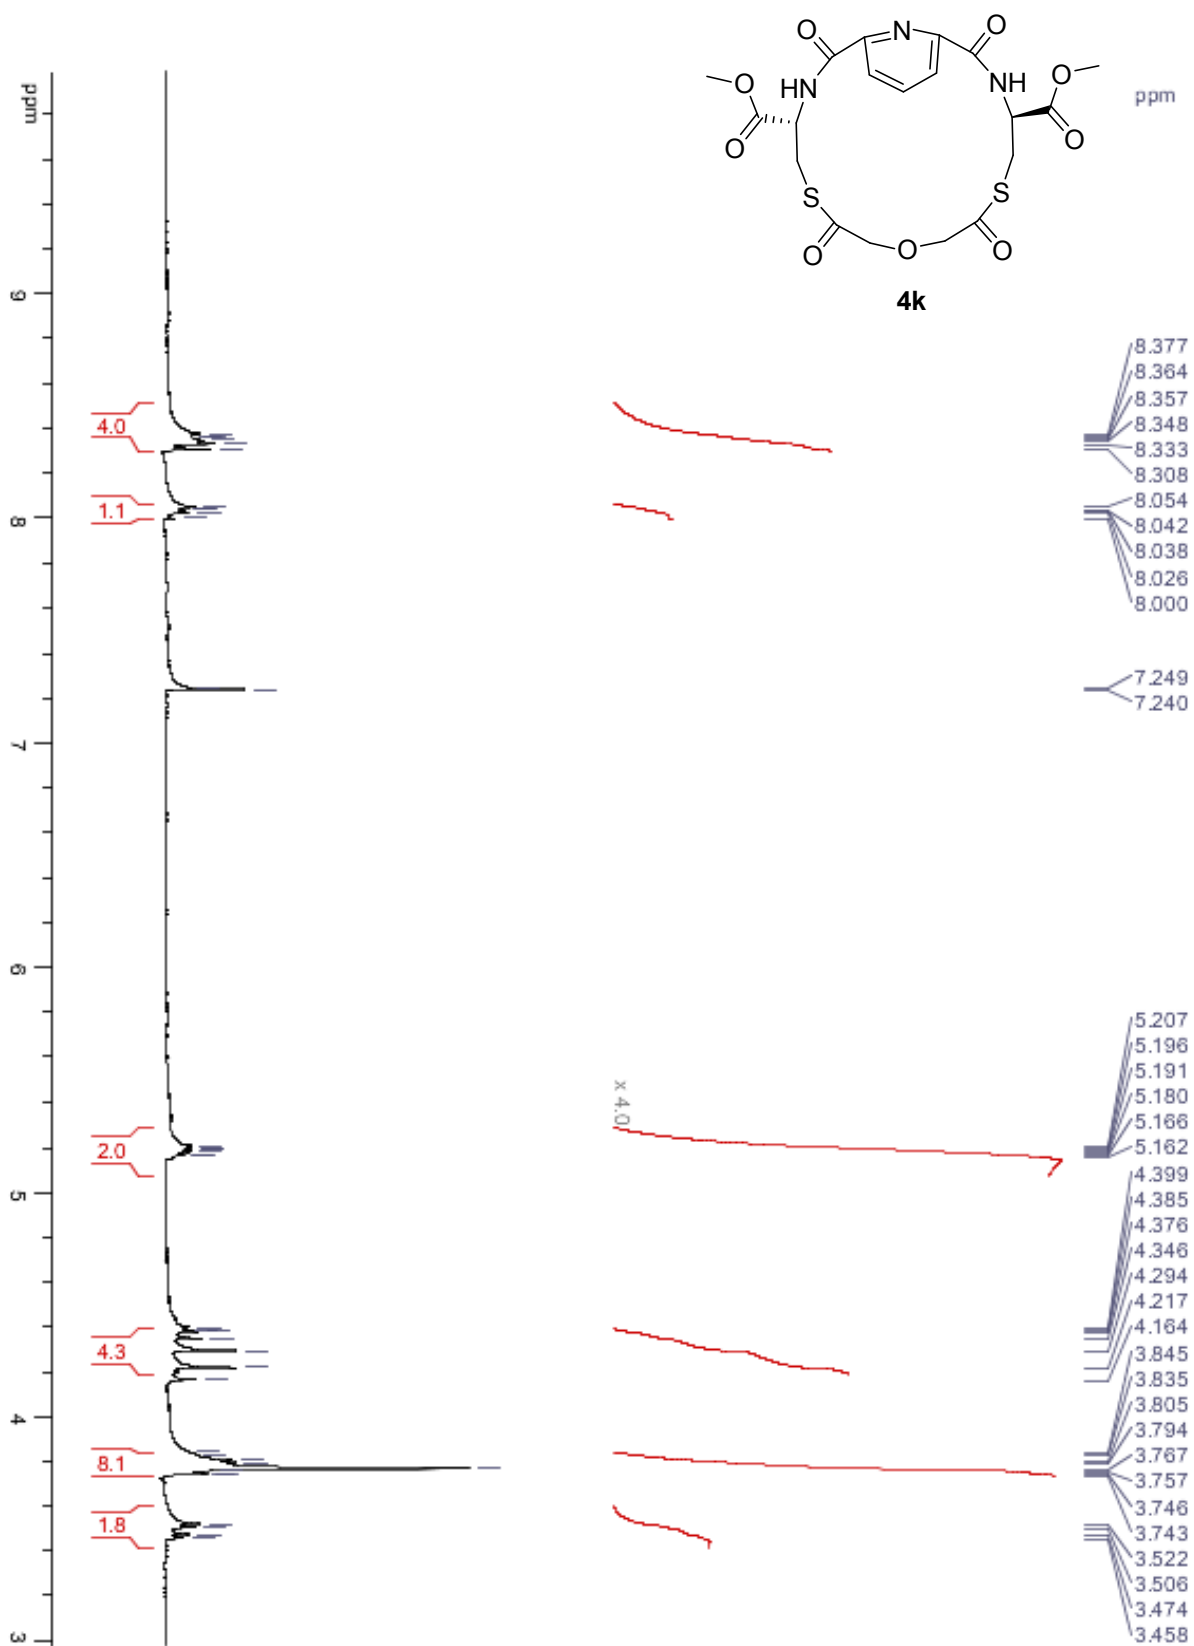

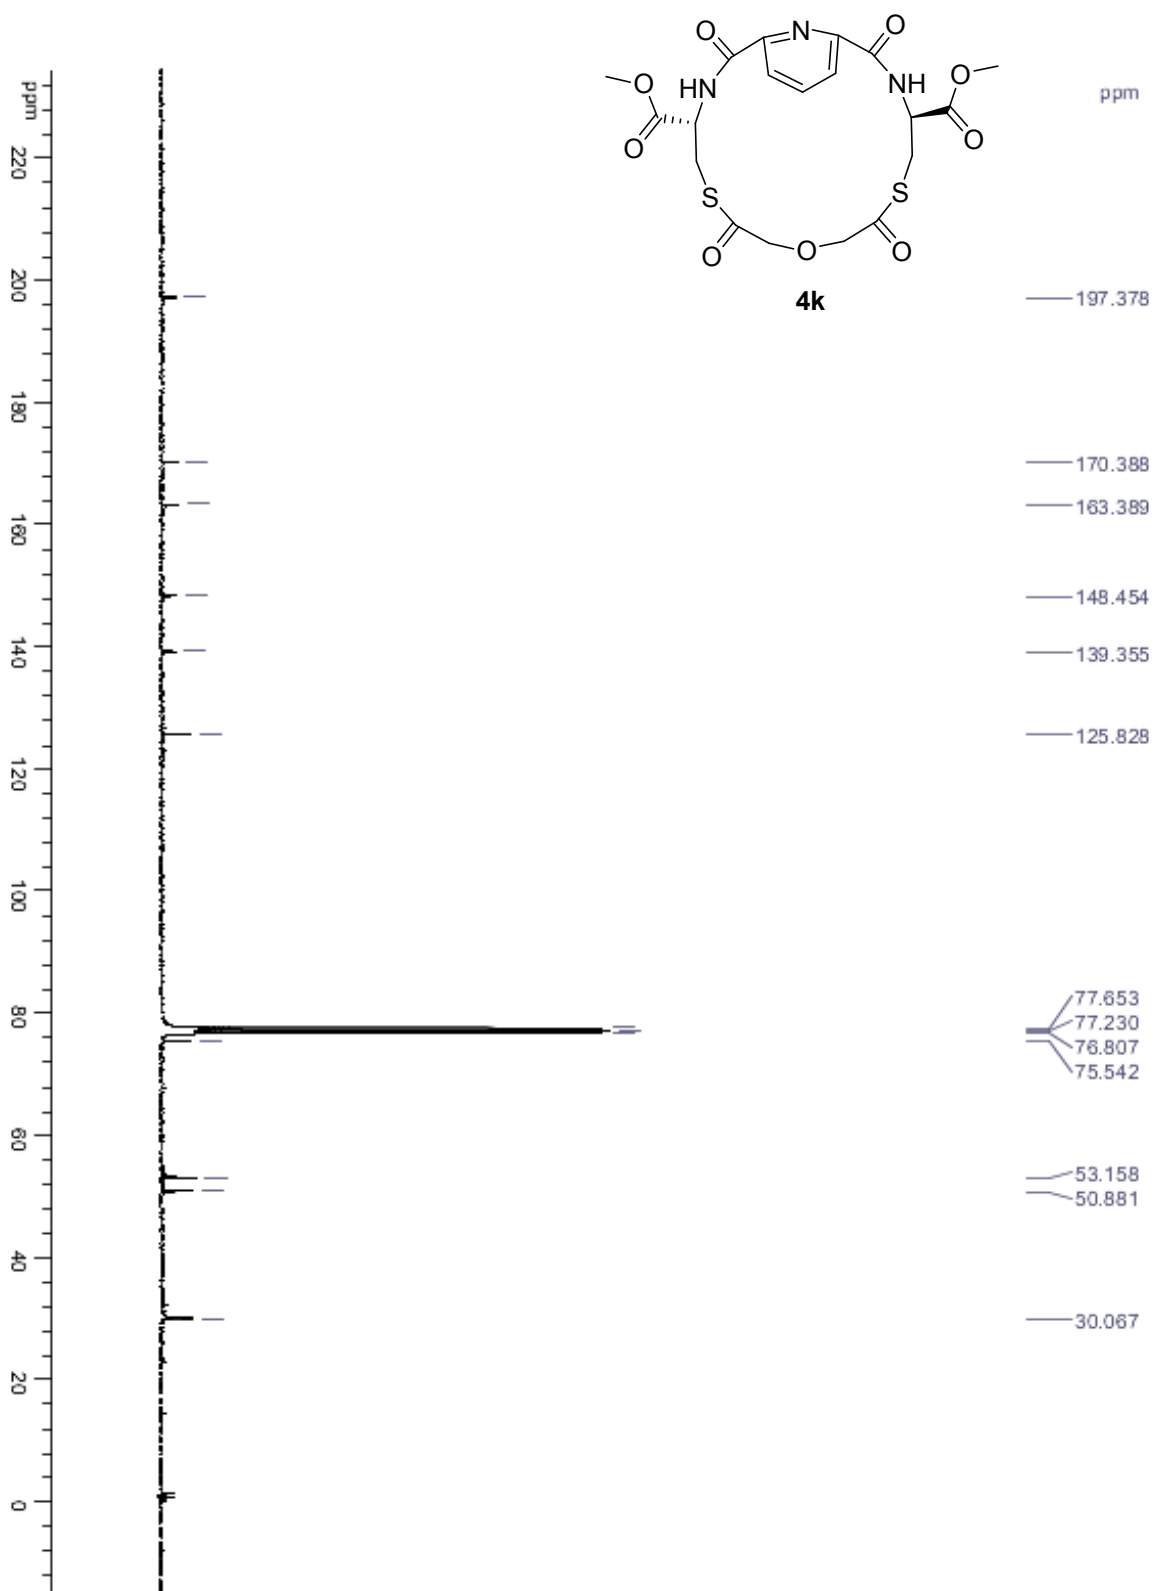



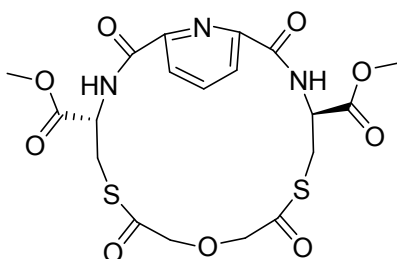

4k

Theoretical  $[M+Na]^+$  = 522.0611  
 $[M+K]^+$  = 538.0351  
 $[M-H+2Na]^+$  = 544.0431

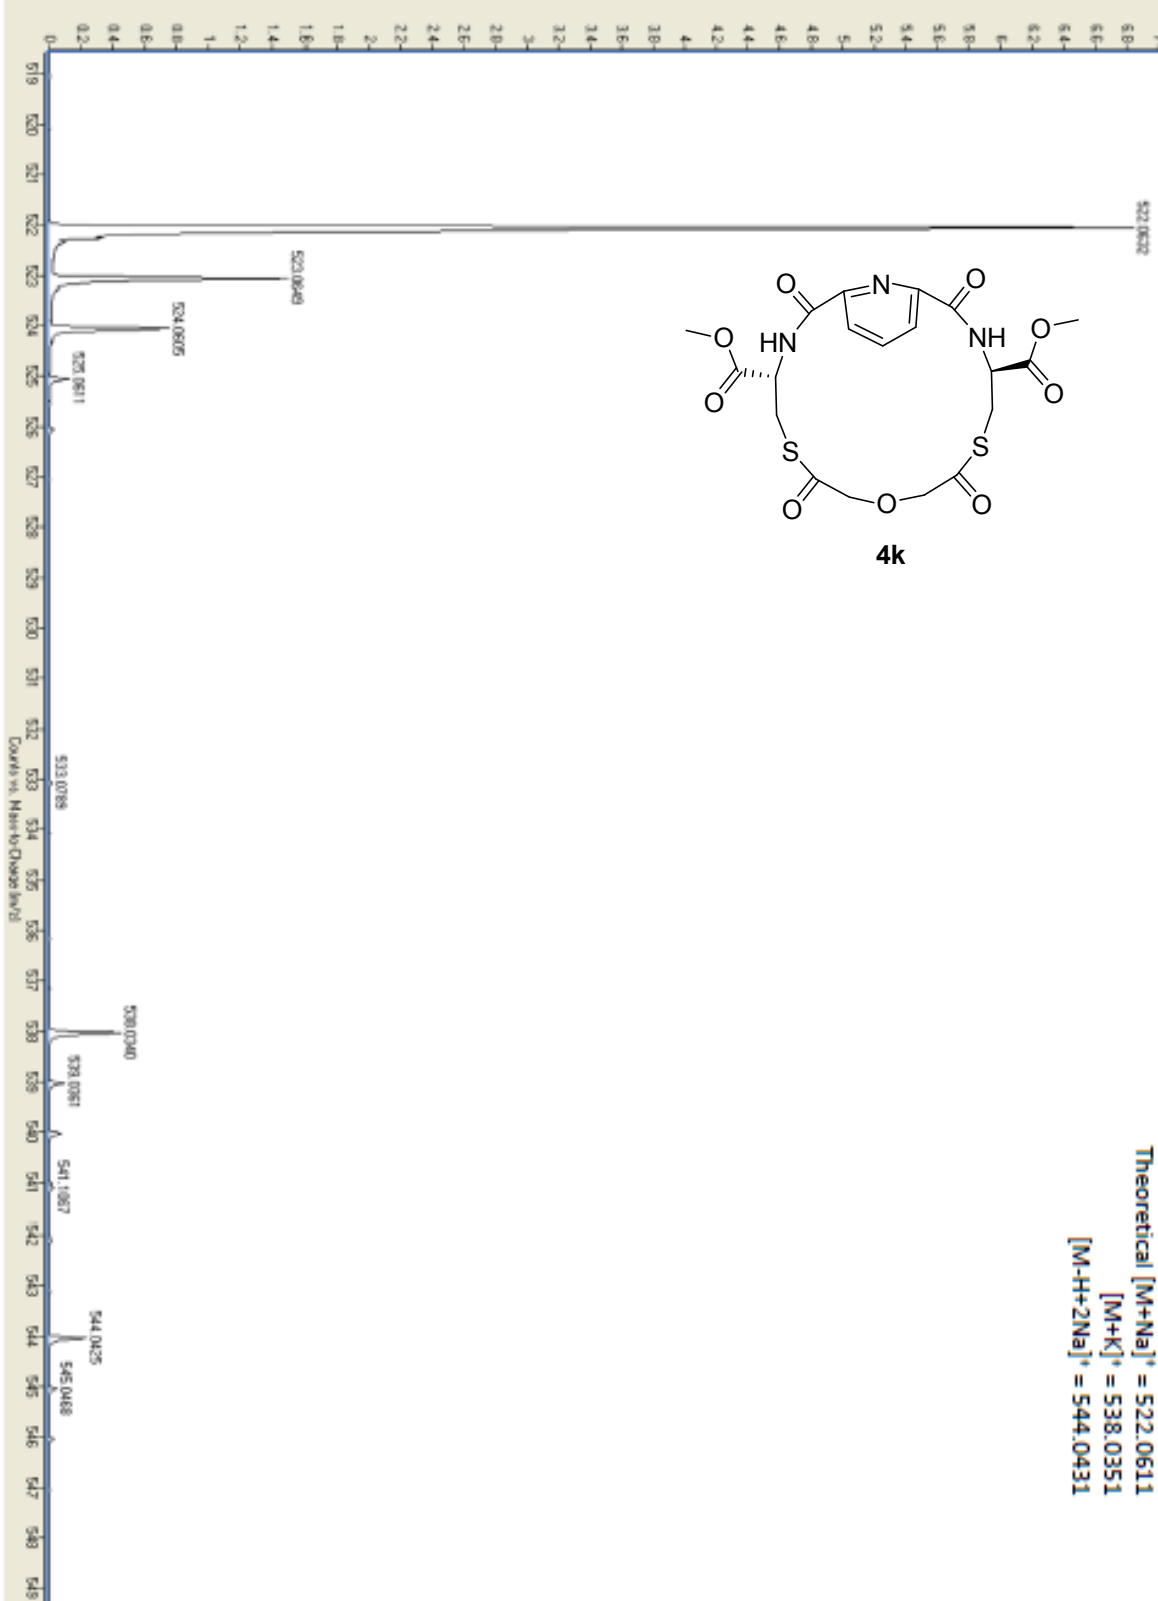

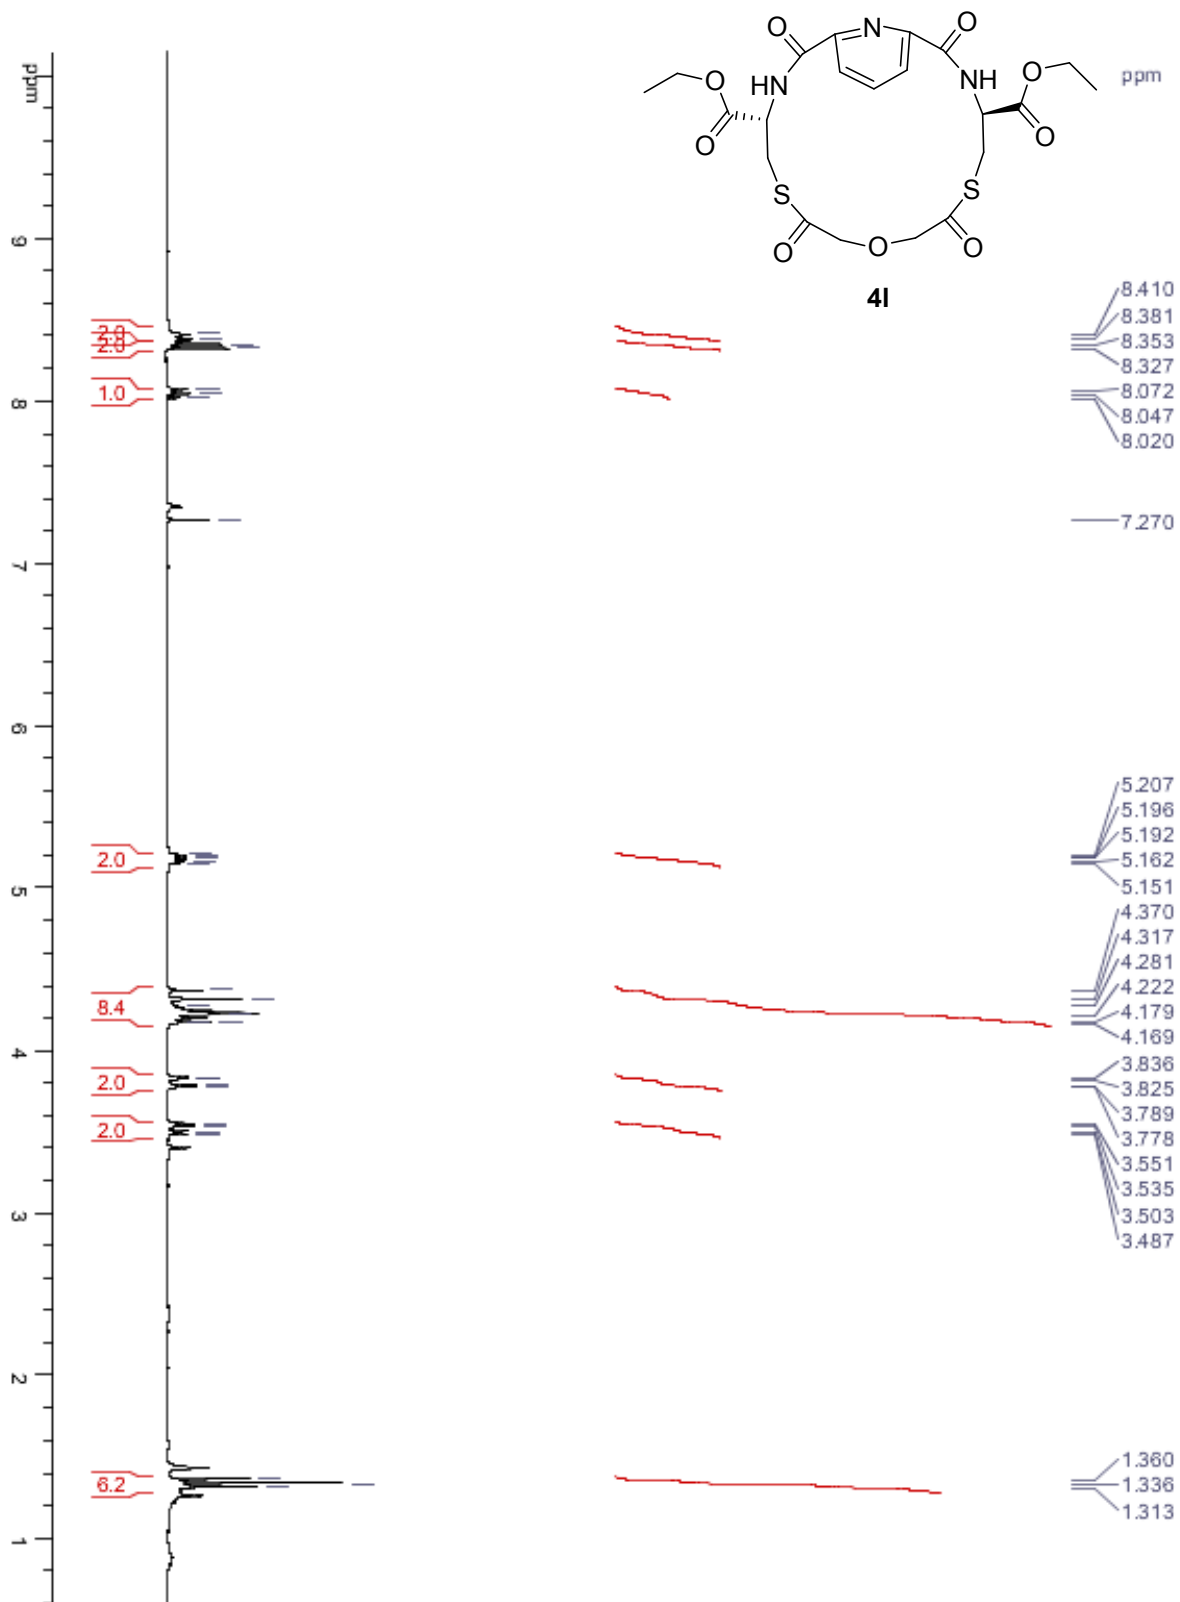

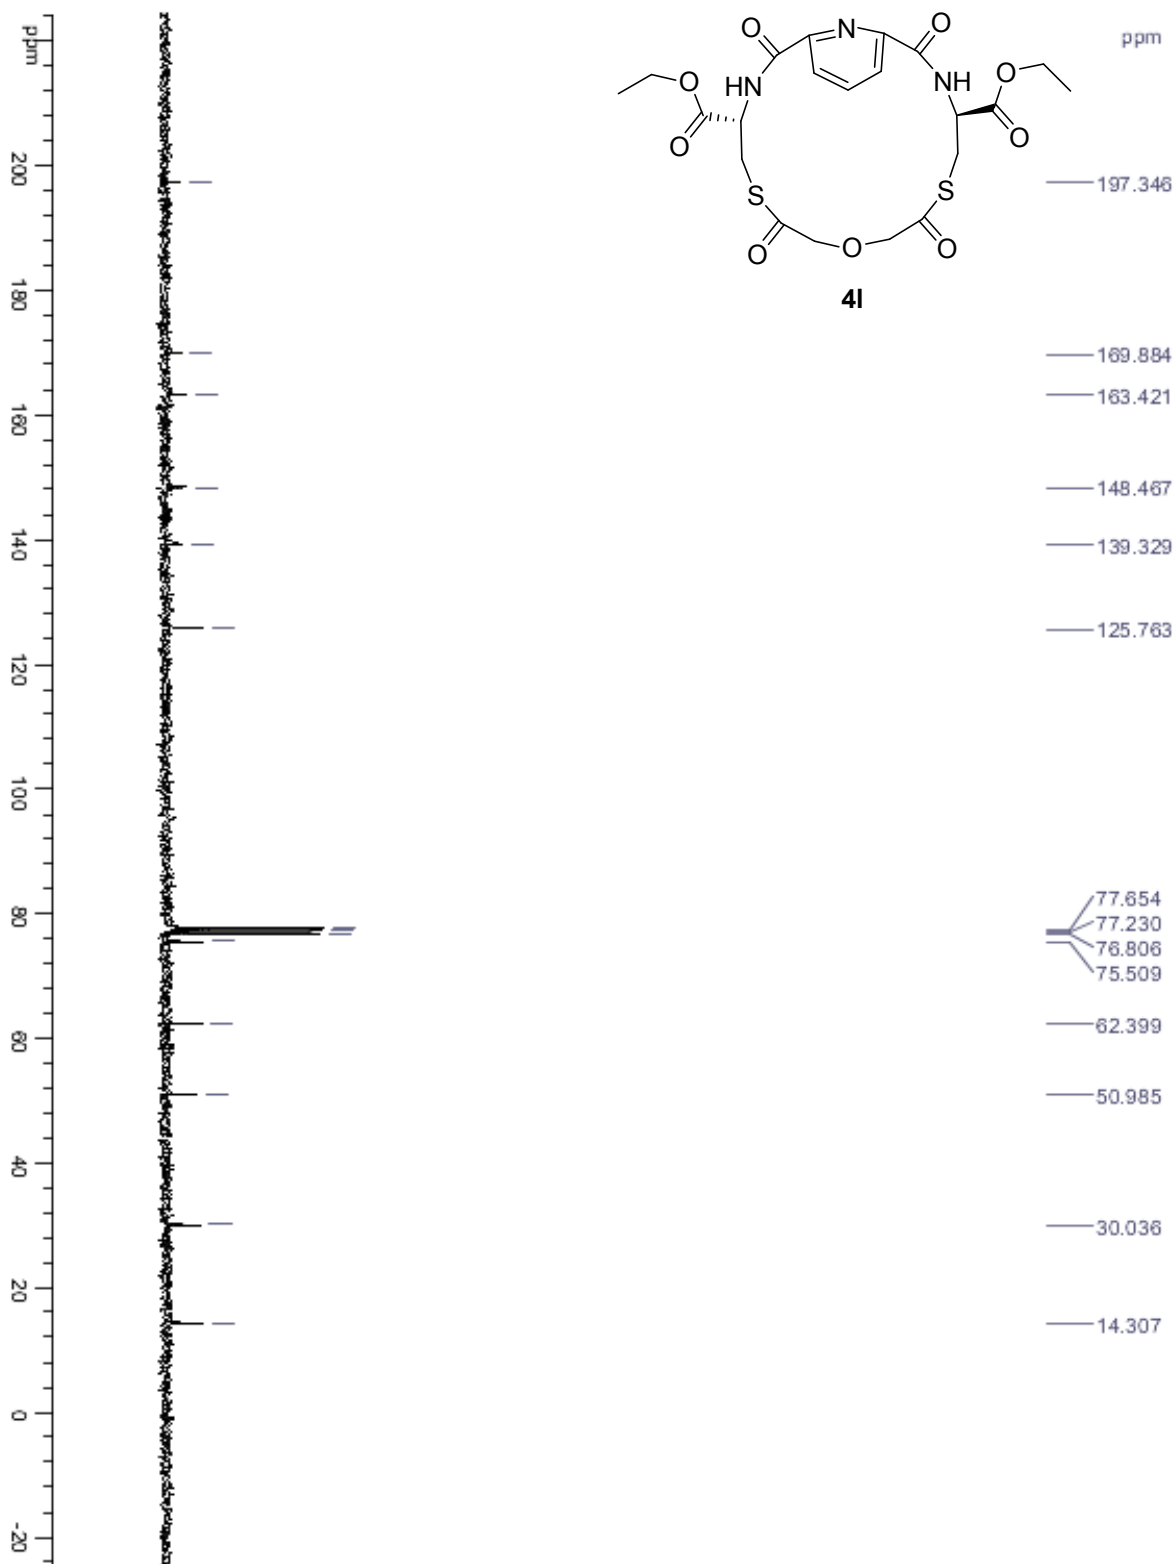

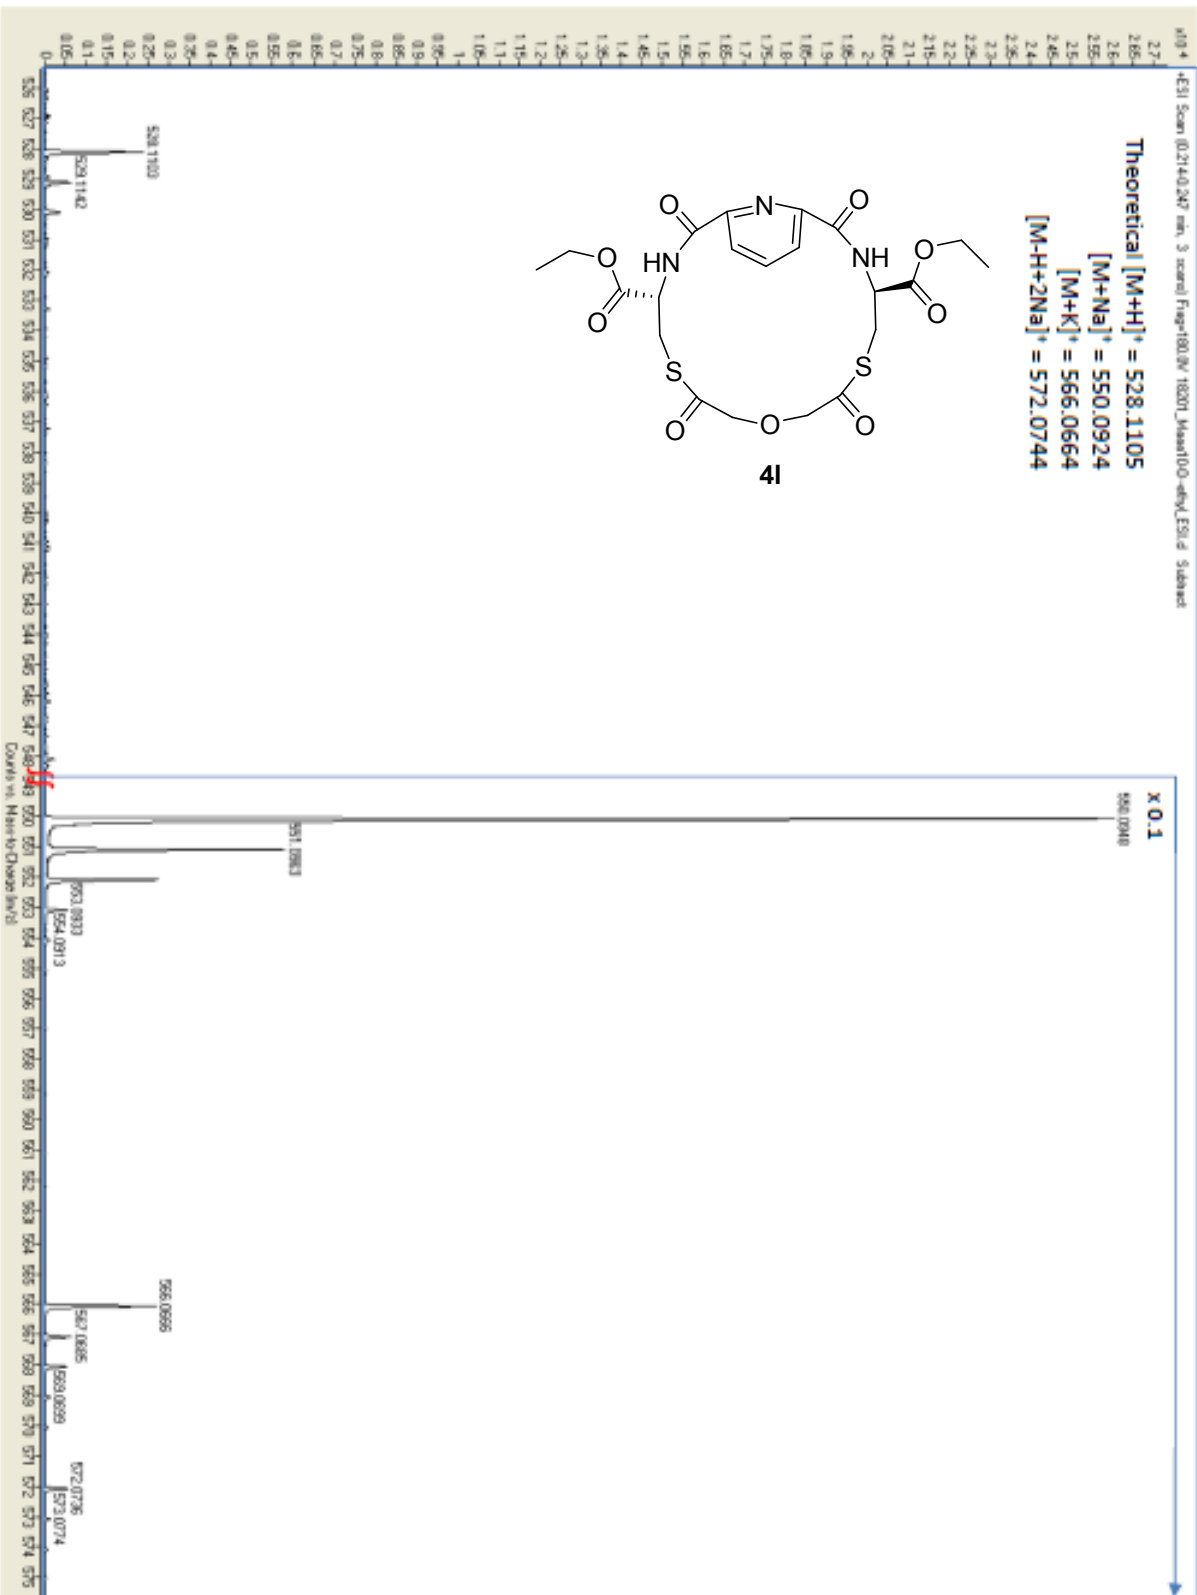

**Table S1.** Molecular descriptor values of the BMLR-QSAR model for the antifungal active macrocyclic peptidomimetics.

| Entry | Compd.    | Descriptors*   |                |                |
|-------|-----------|----------------|----------------|----------------|
|       |           | D <sub>1</sub> | D <sub>2</sub> | D <sub>3</sub> |
| 1     | <b>4a</b> | 0.0043         | -1153.12       | 19.5355        |
| 2     | <b>4b</b> | 0.0046         | -1209.1        | 19.4839        |
| 3     | <b>4c</b> | 0.00623        | -1264.3        | 19.5096        |
| 4     | <b>4d</b> | 0.00455        | -1460.3        | 19.5223        |
| 5     | <b>4e</b> | 0.00944        | -1268.36       | 19.5329        |
| 6     | <b>4f</b> | 0.0091         | -1300.97       | 19.4882        |
| 7     | <b>4g</b> | 0.00238        | -1221.38       | 19.468         |
| 8     | <b>4h</b> | 0.00213        | -1061.68       | 19.4667        |
| 9     | <b>4i</b> | 0.00559        | -1047.9        | 19.4659        |
| 10    | <b>4j</b> | 0.00159        | -1017.77       | 19.4645        |
| 11    | <b>4k</b> | 0.00755        | -934.668       | 19.5165        |
| 12    | <b>4l</b> | 0.00235        | -1179.24       | 19.4717        |
| 13    | <b>5</b>  | 0.01884        | -1221.8        | 19.5034        |
| 14    | <b>6</b>  | 0.02522        | -1232.66       | 19.5044        |
| 15    | <b>7</b>  | 0.01537        | -900.929       | 19.472         |

\*D<sub>1</sub> = FHDCA Fractional HDCA (HDCA/TMSA) (MOPAC PC), D<sub>2</sub> = WNSA-2 Weighted PNSA (PNSA2\*TMSA/1000) (MOPAC PC), D<sub>3</sub> = Max. total interaction for bond C-C.

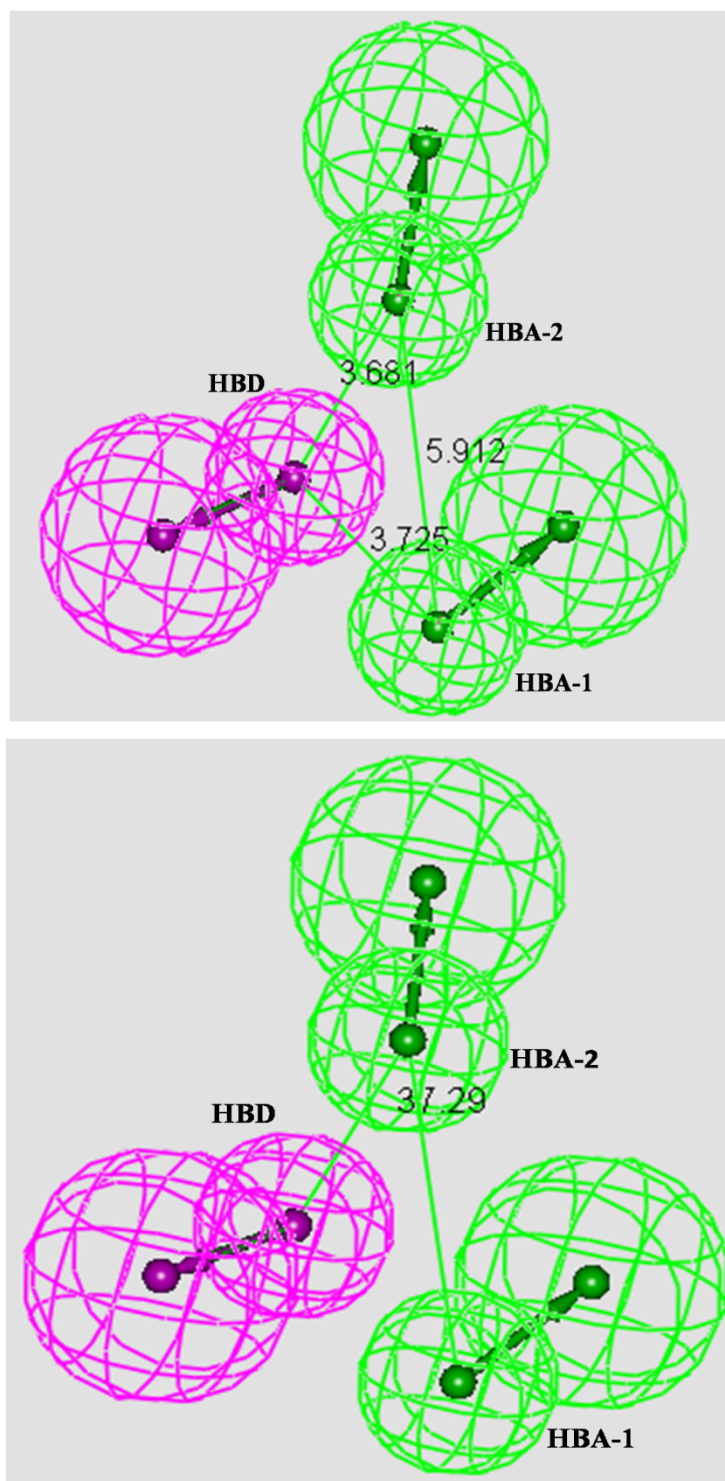

**Figure S1.** (A) Constraint distances, and (B) constraint angle of the generated 3D-pharmacophore for the antifungal bio-active compounds **4a-4l**, and **5-7** against *C. albicans* which contains two hydrogen bonding acceptor (HBA-1, HBA-2, green), and one hydrogen bonding donor (HBD, purple).

**Compound 4a**

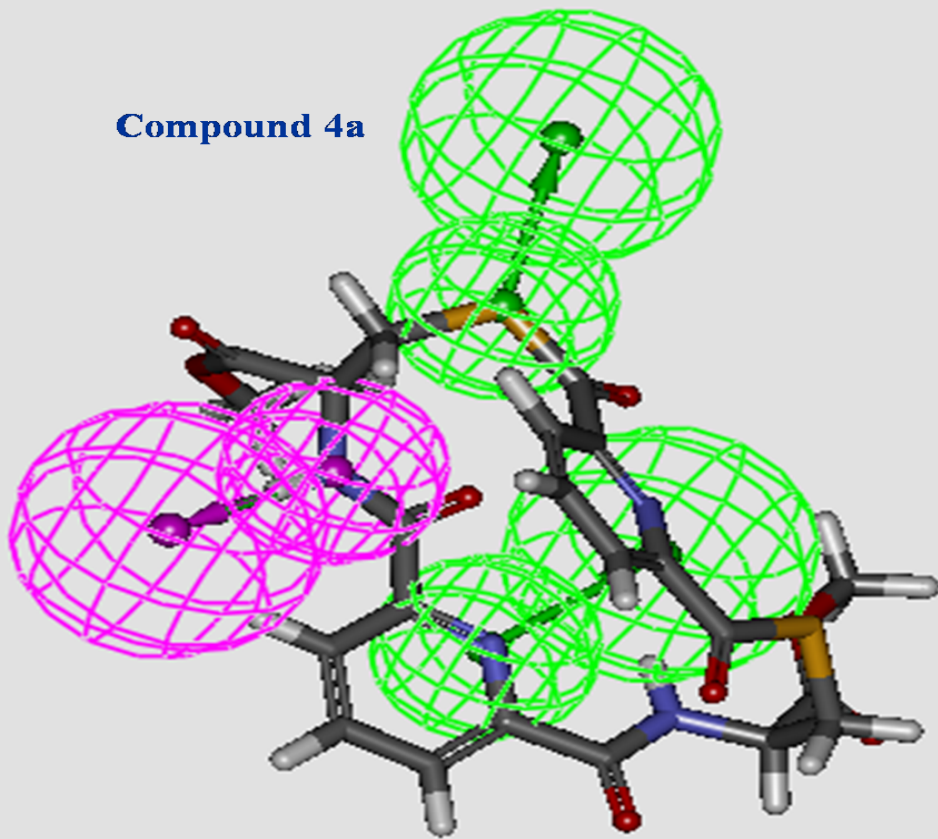

**Compound 4b**

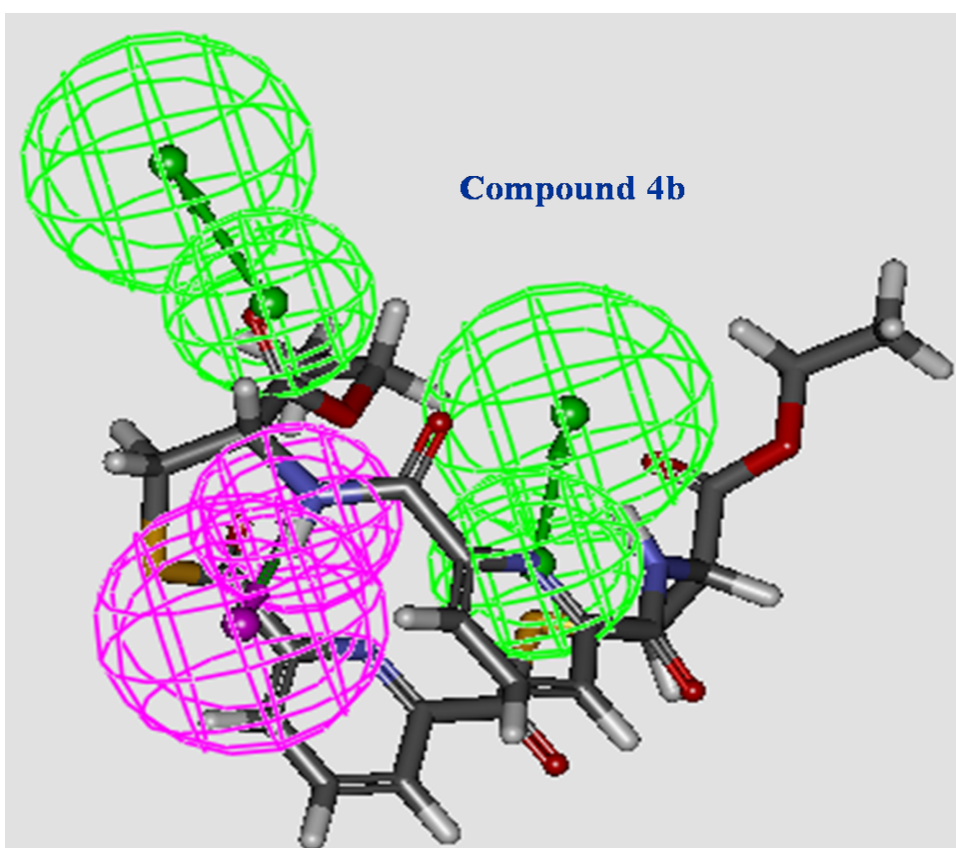

**Compound 4c**

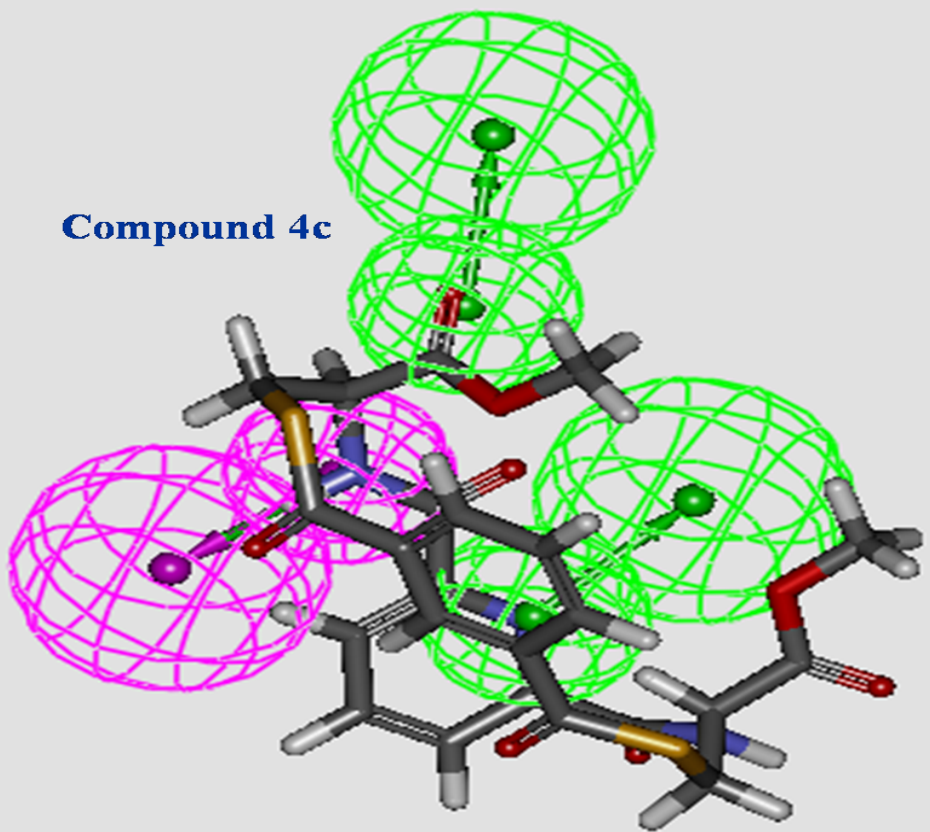

**Compound 4d**

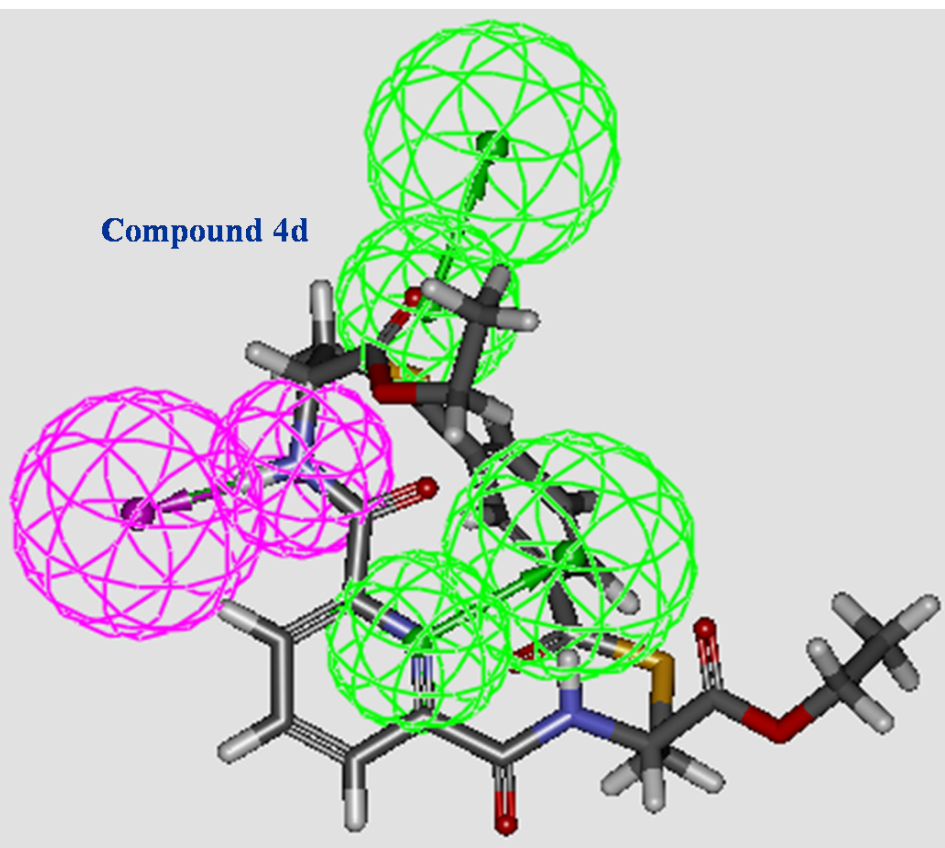



**Compound 4e**

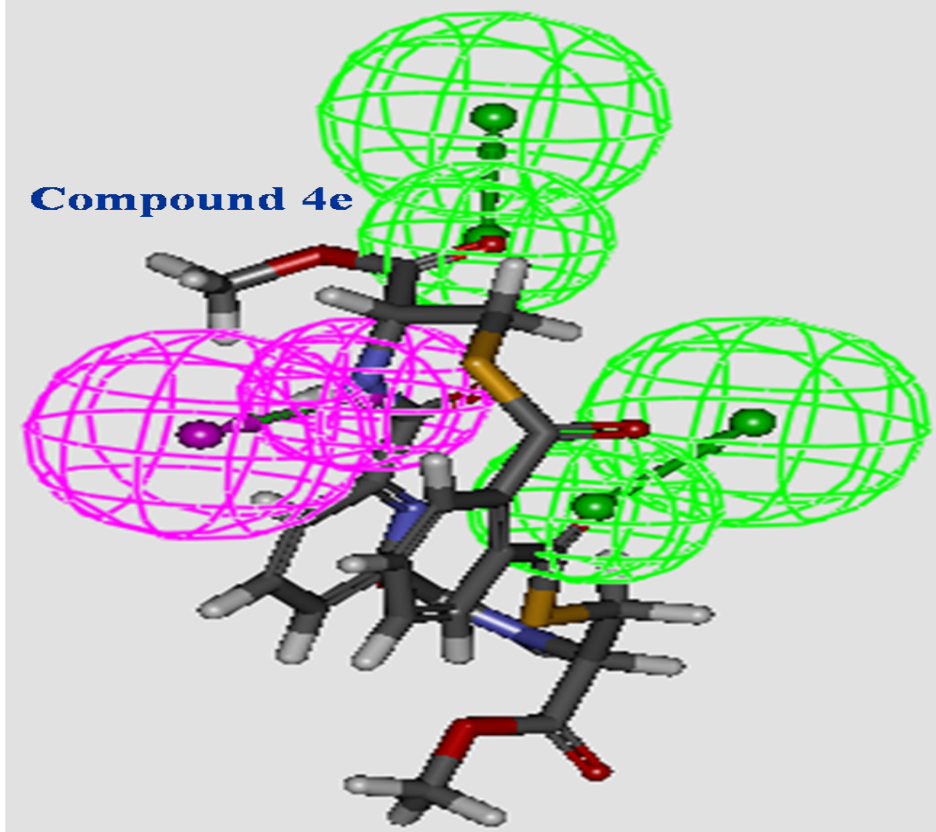

**Compound 4f**

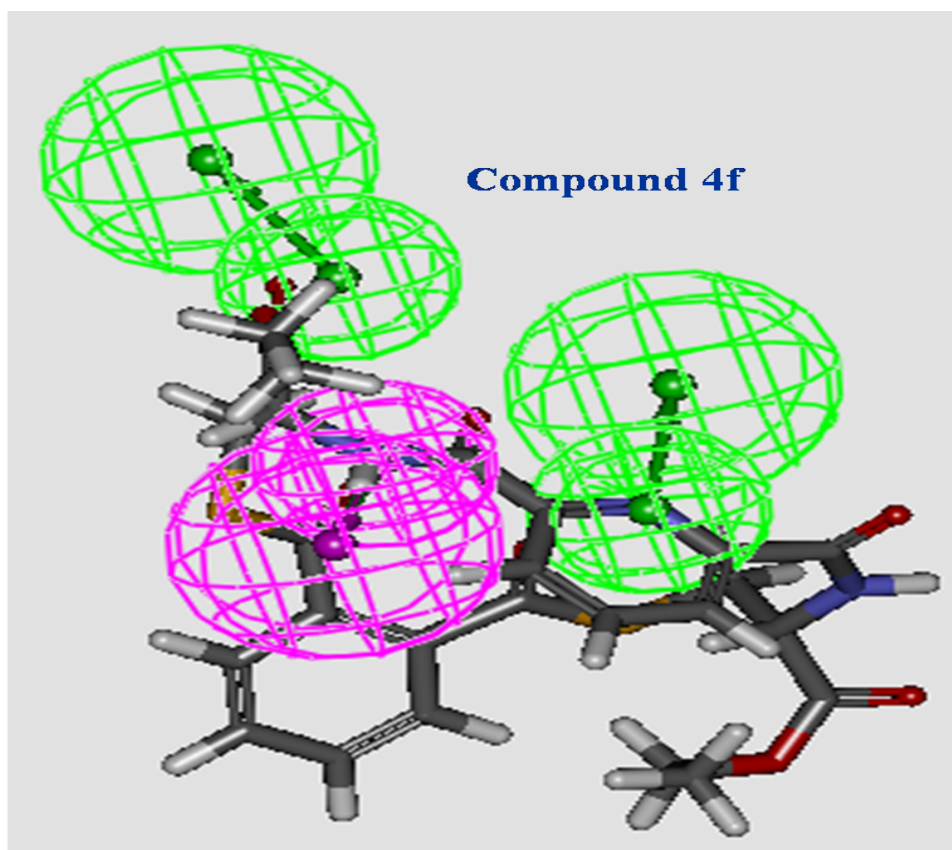

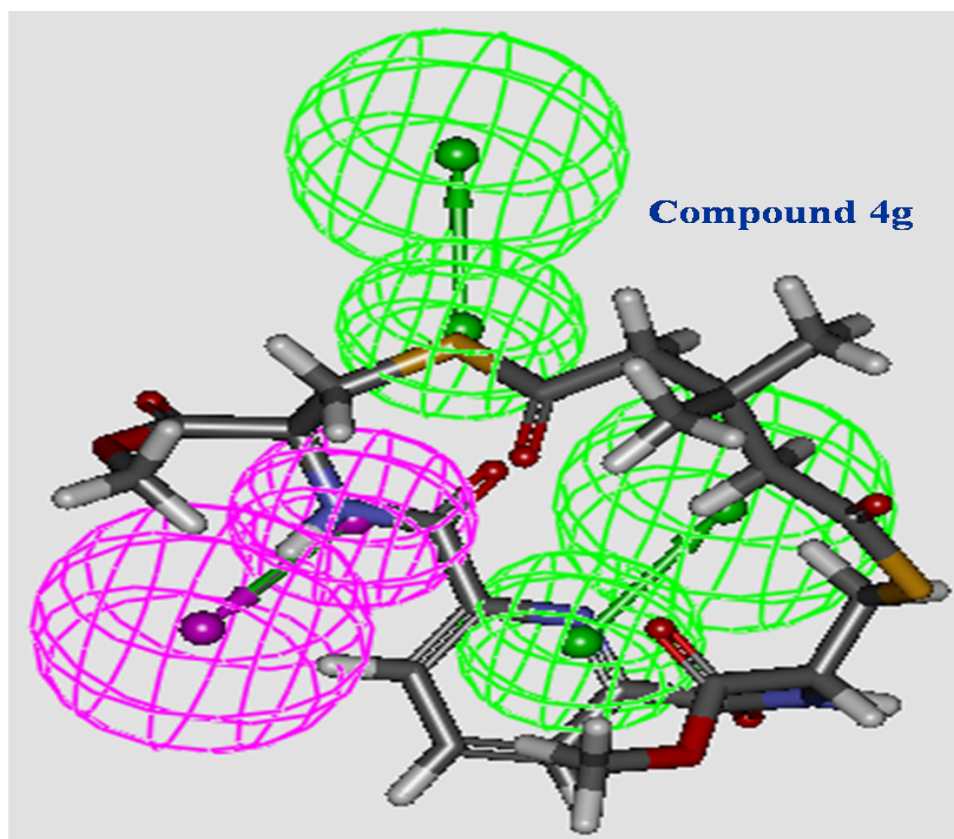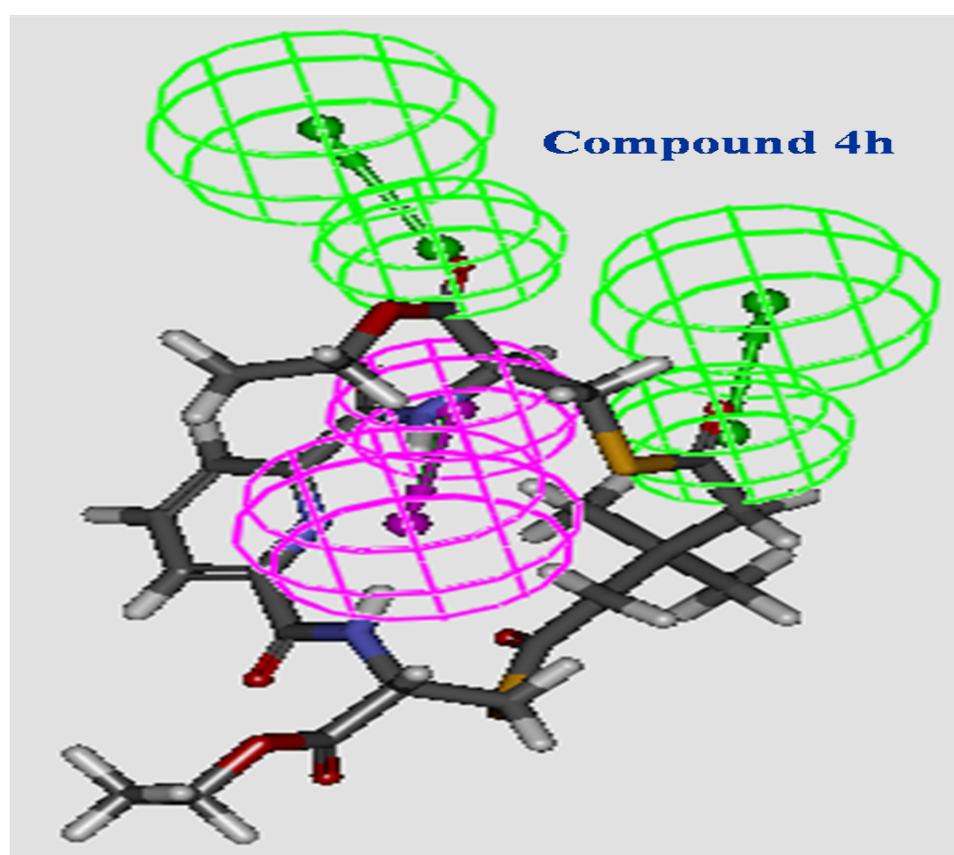

**Compound 4i**

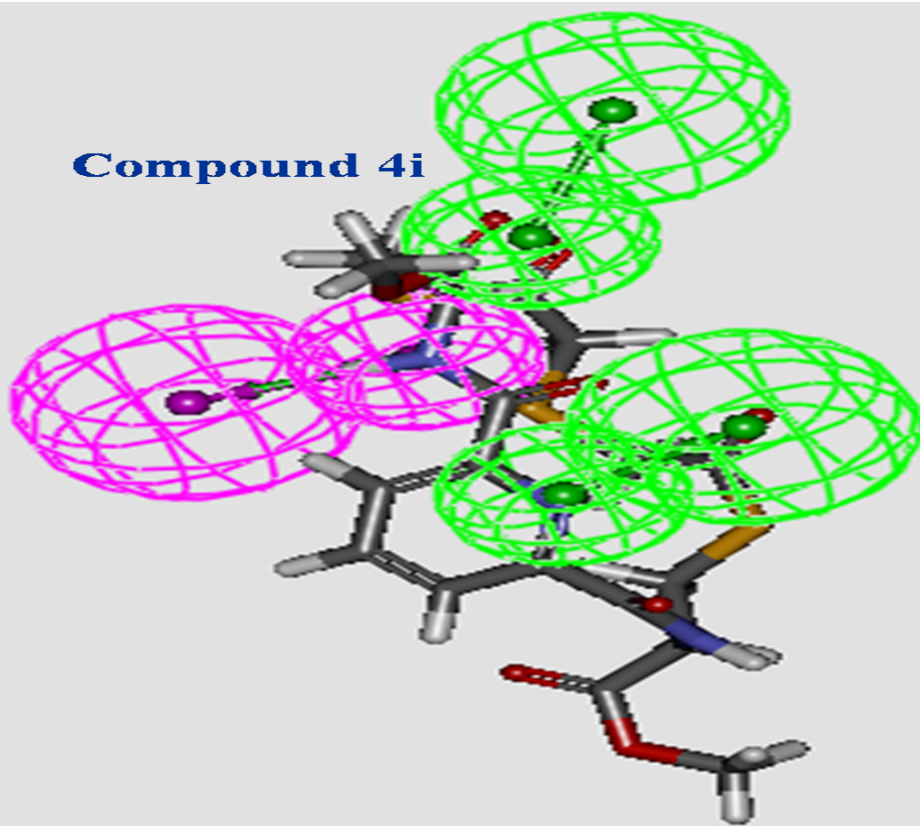

**Compound 4j**

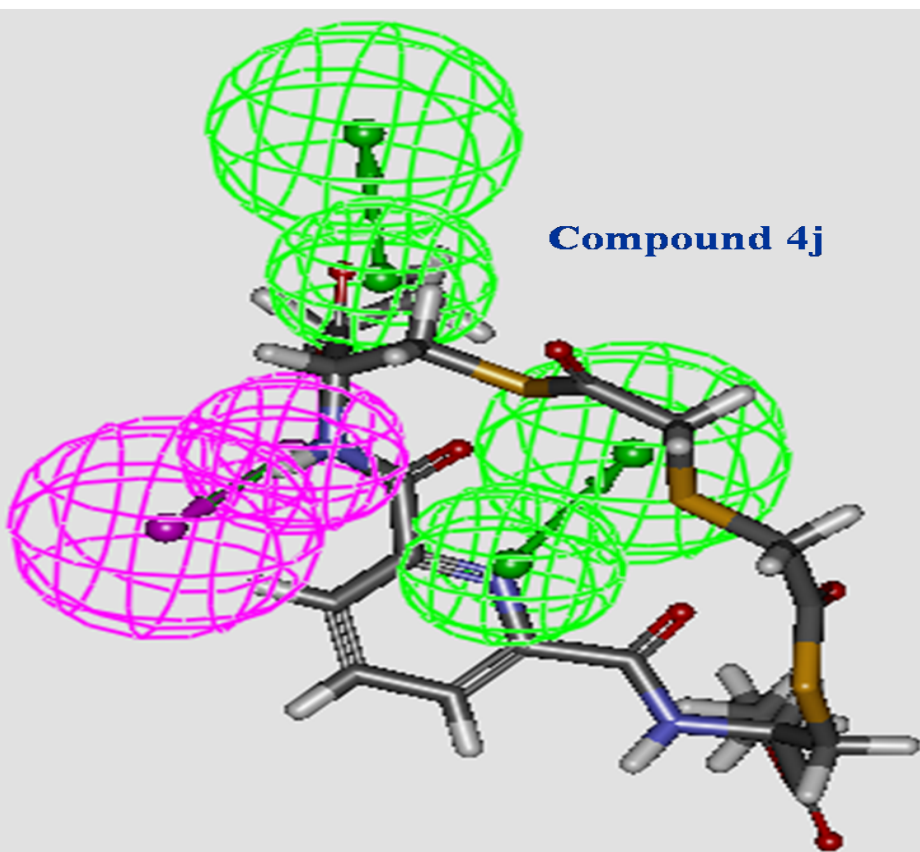

**Compound 4k**

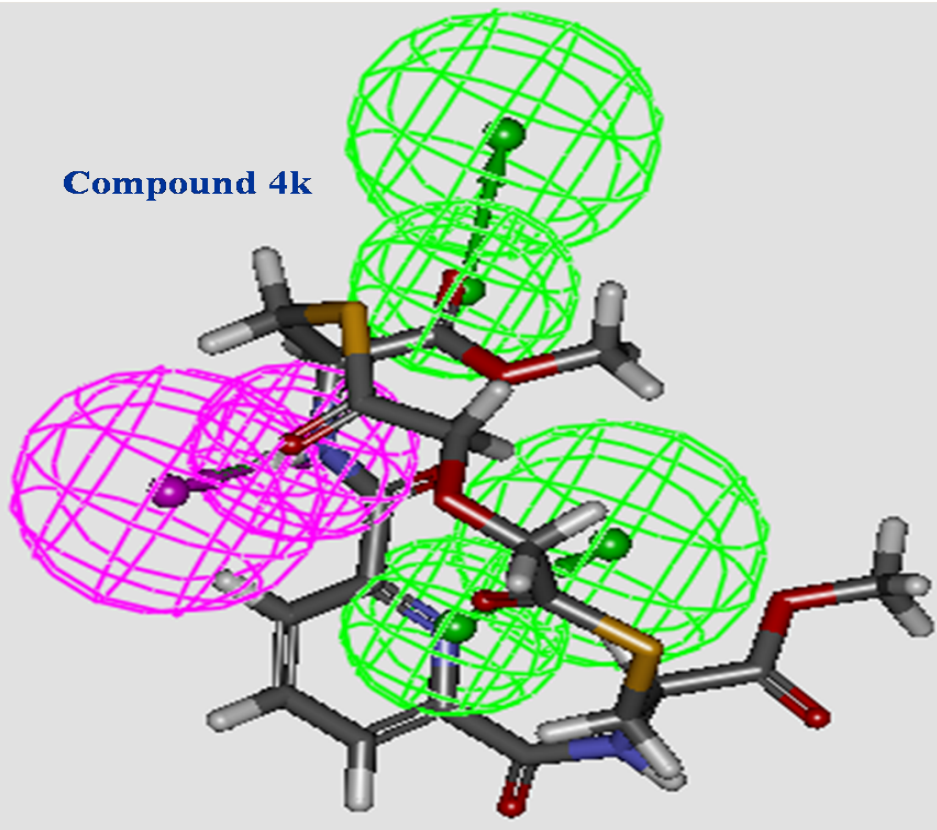

**Compound 4l**

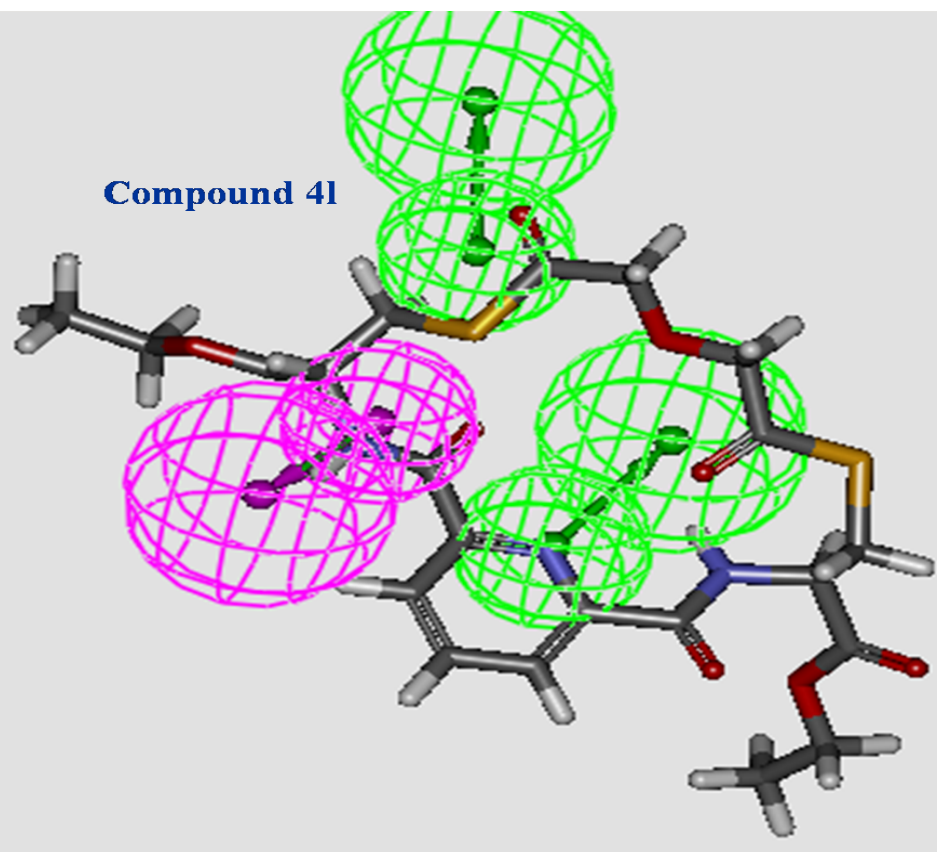

**Compound 5**

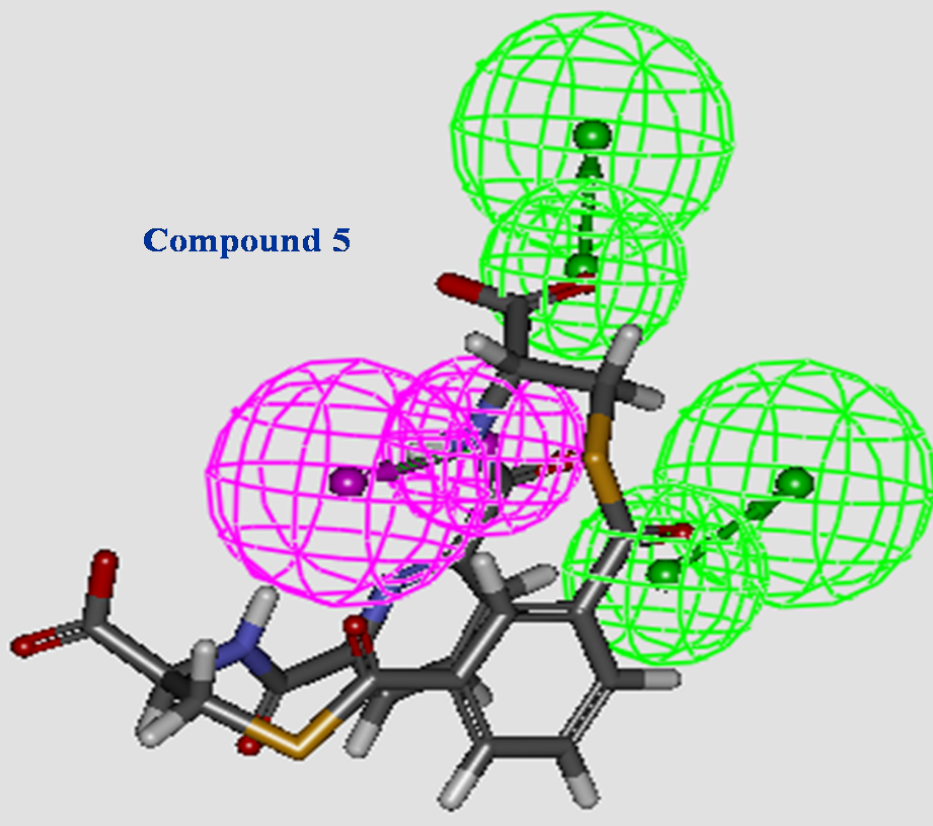

**Compound 6**

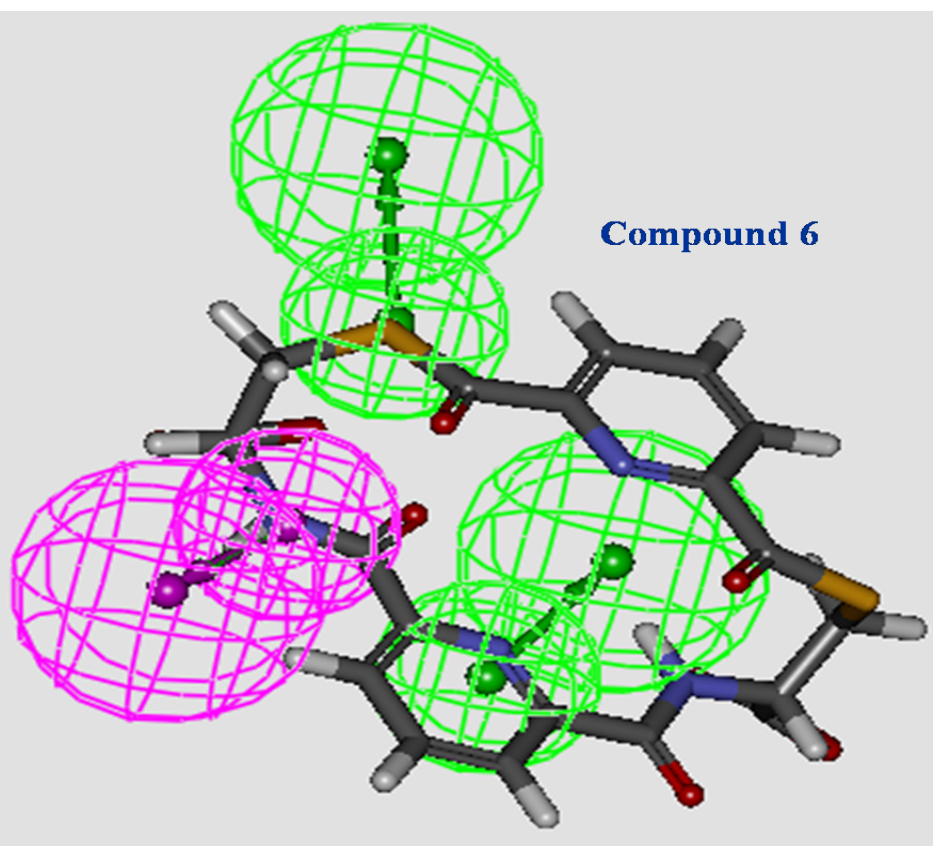

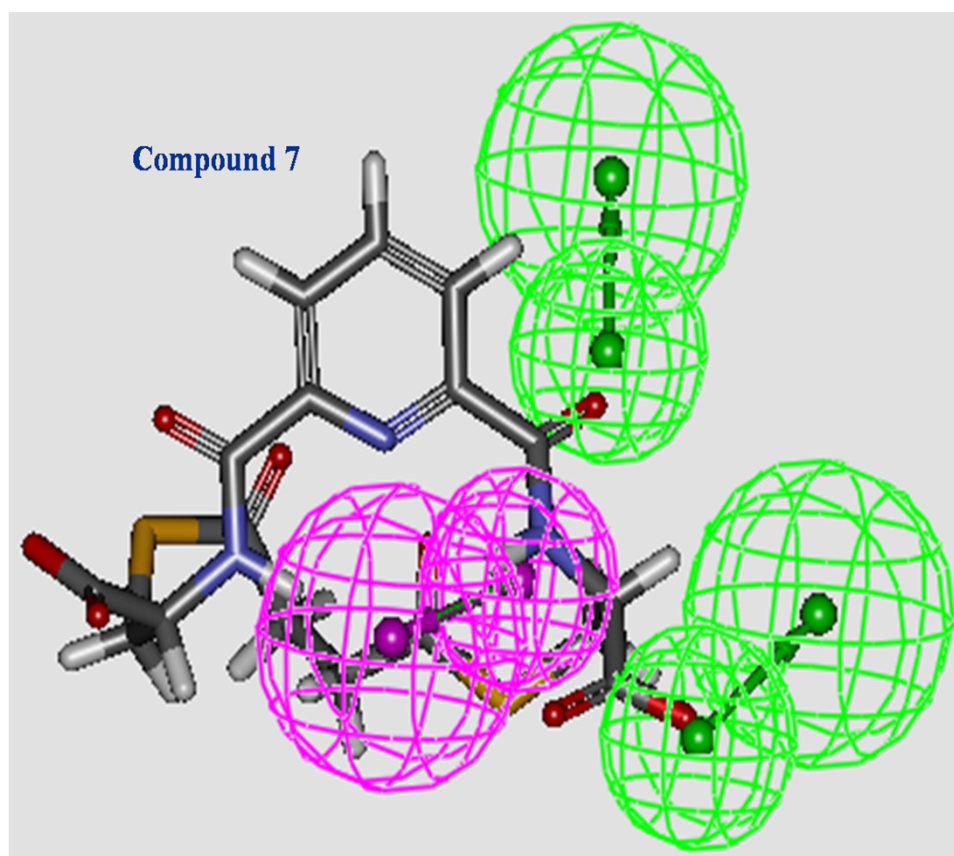

**Figure S2.** 3D-pharmacophore mapped on the antifungal macrocyclic peptidomimetics **4a-4l**, and **5-7**.

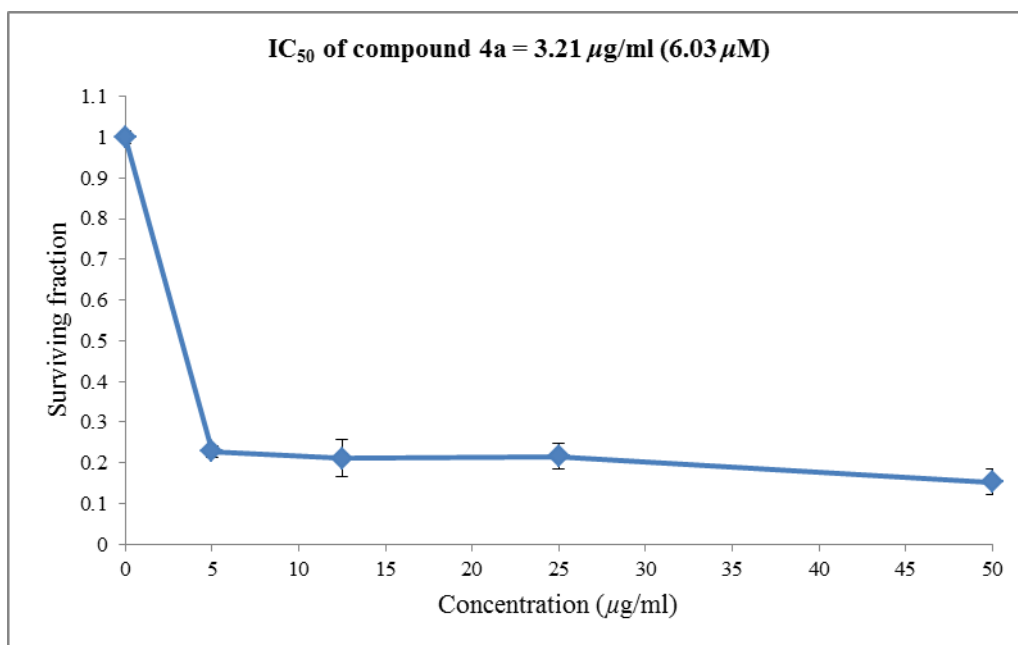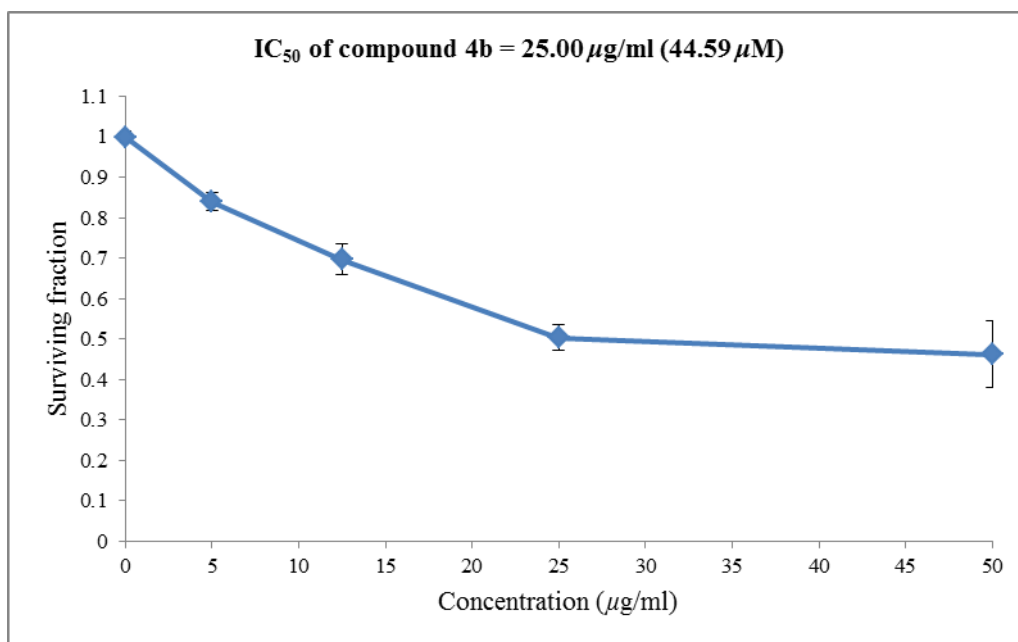

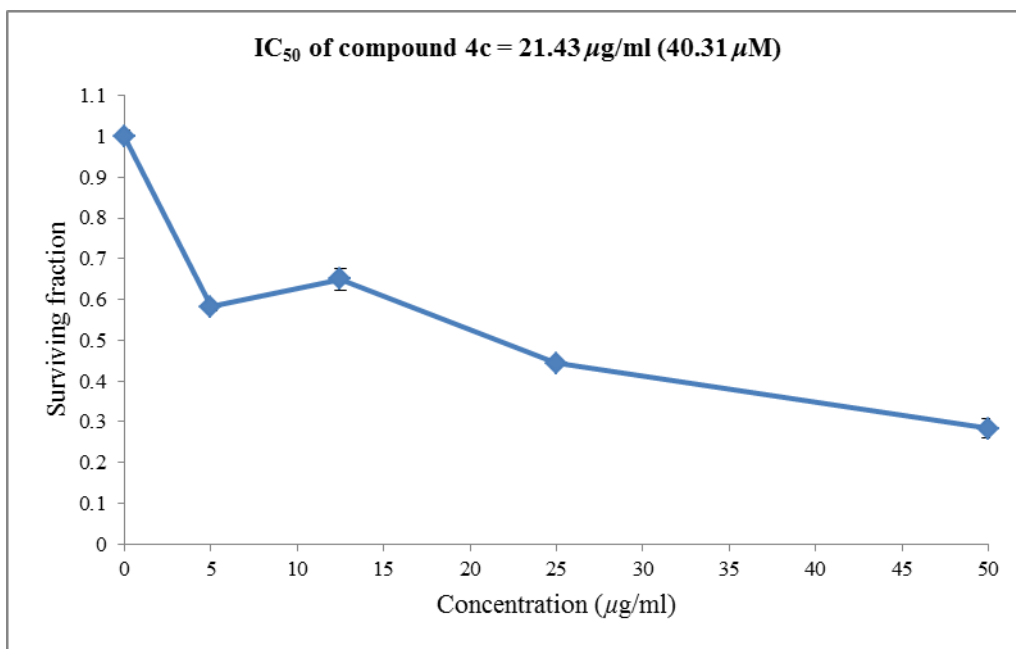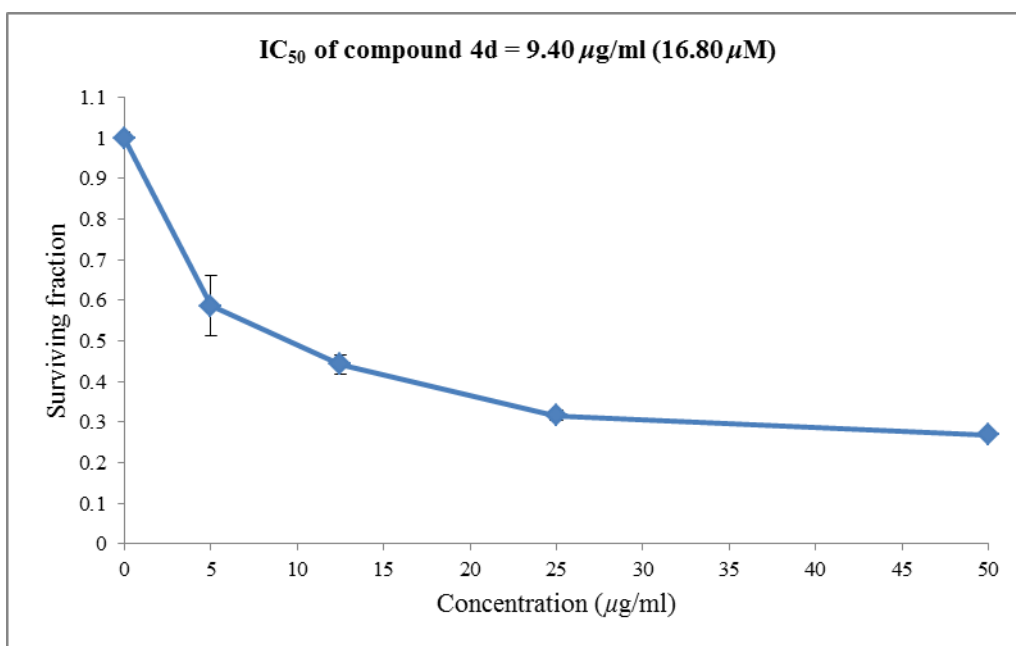



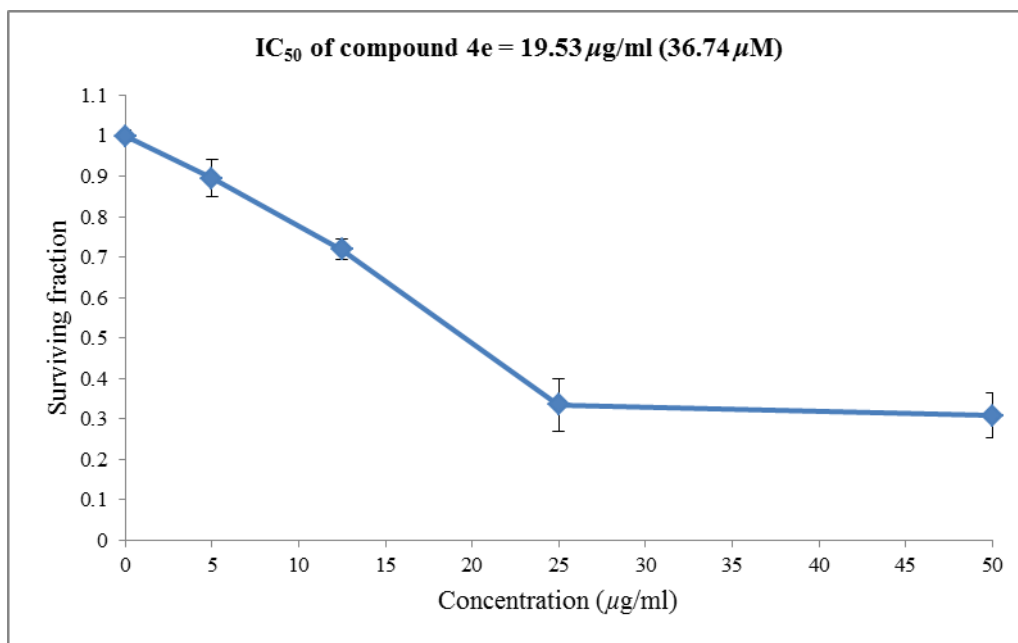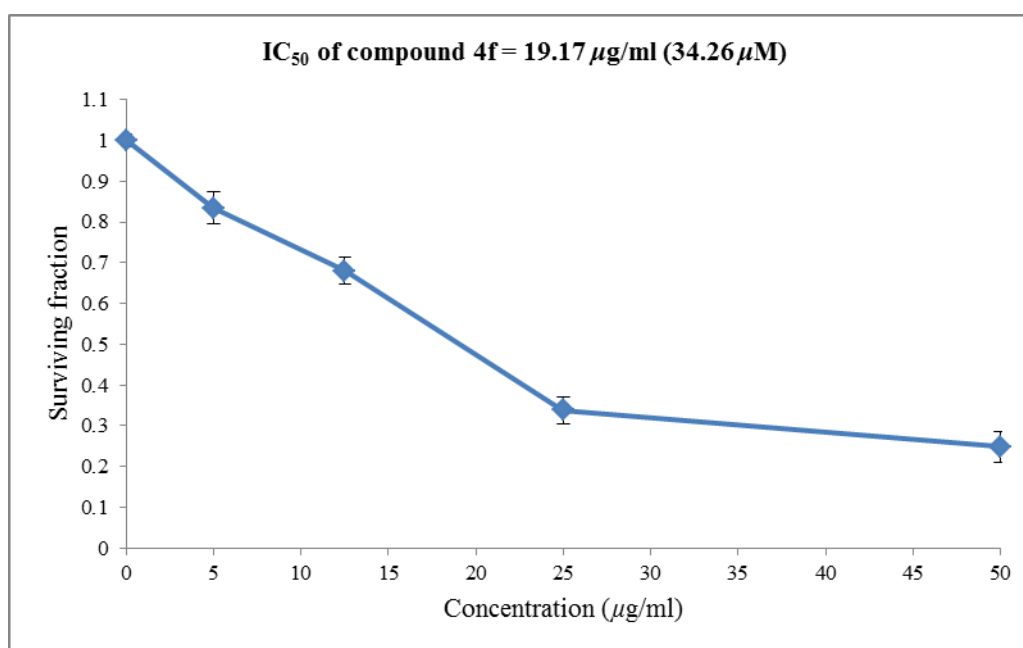

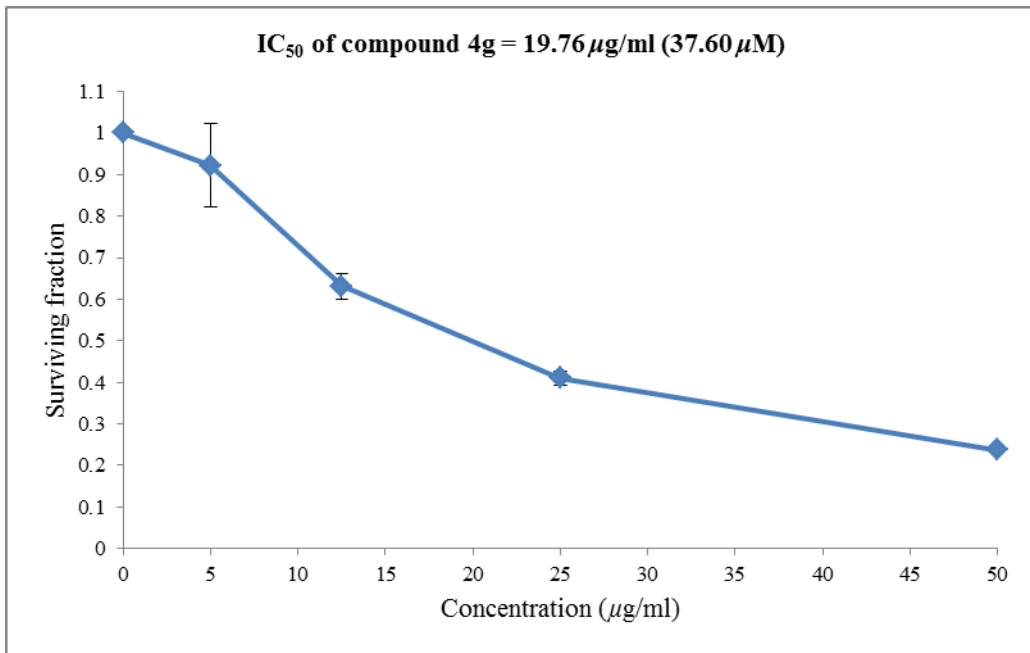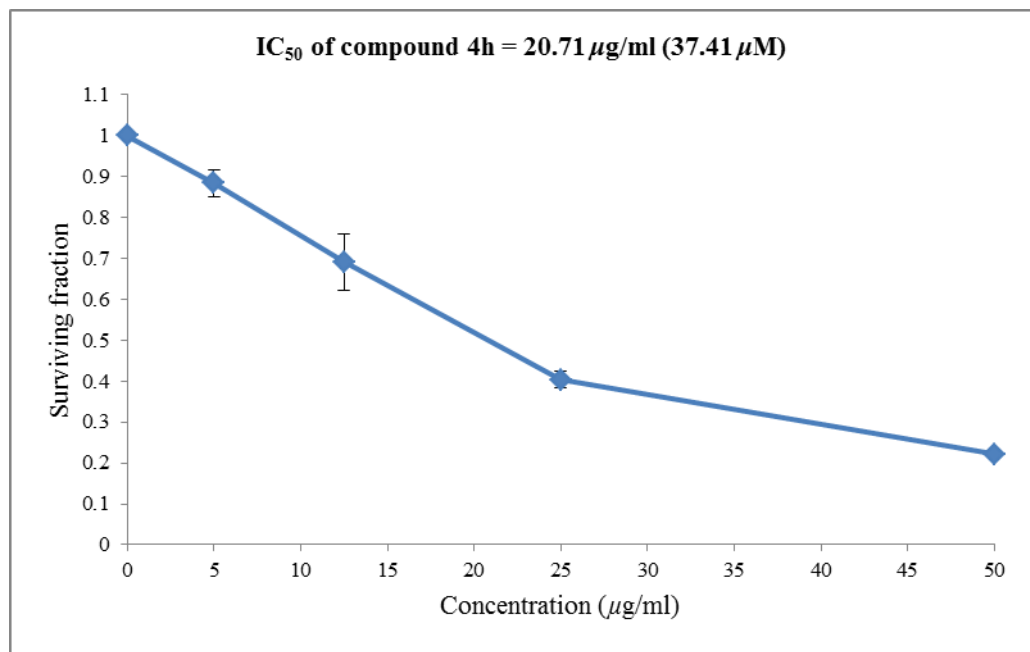

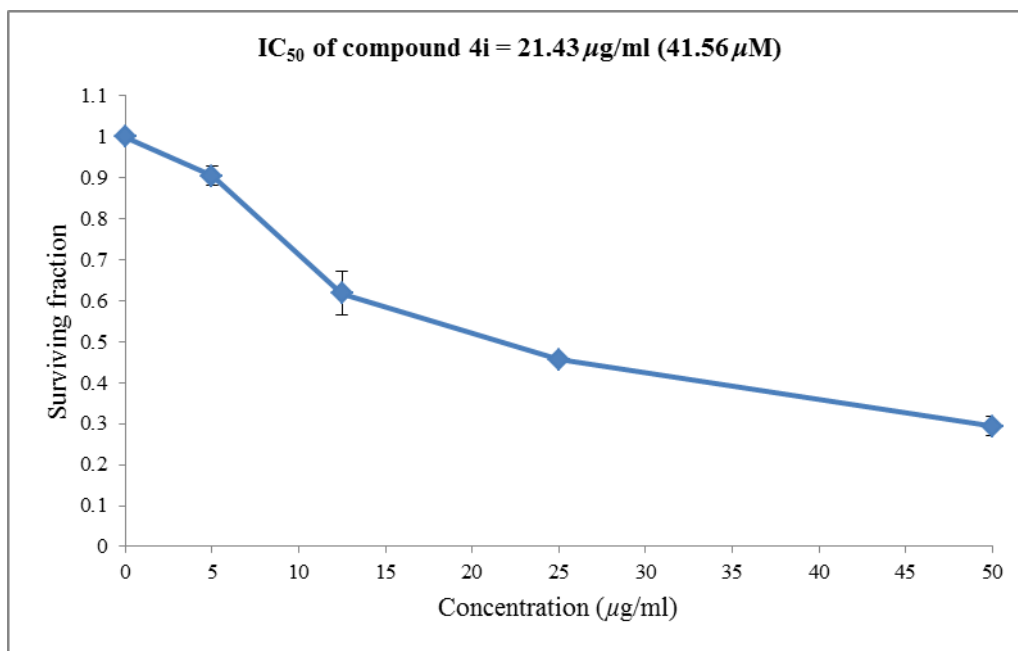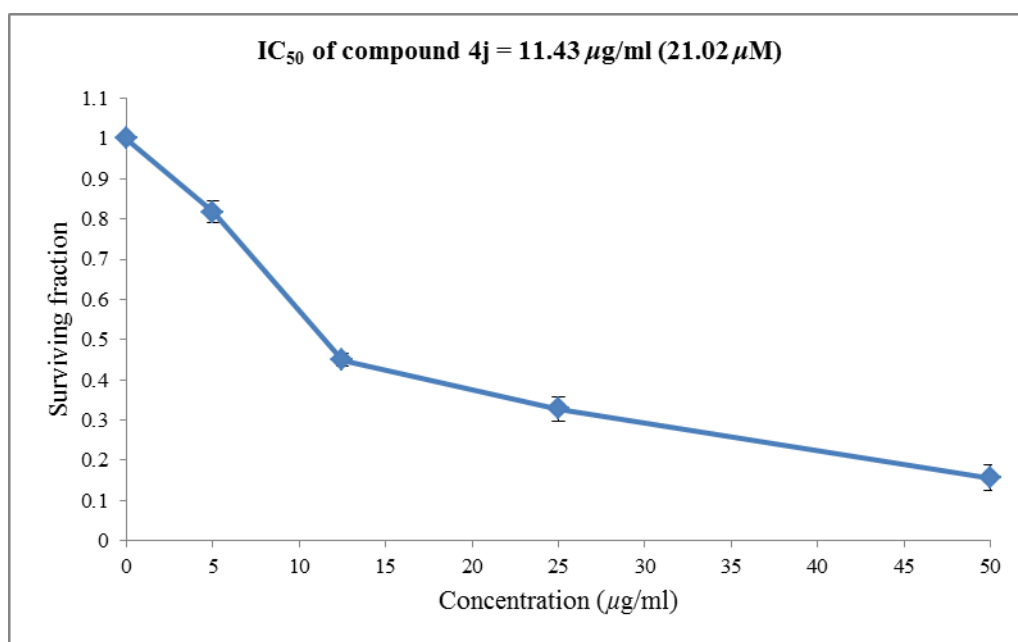

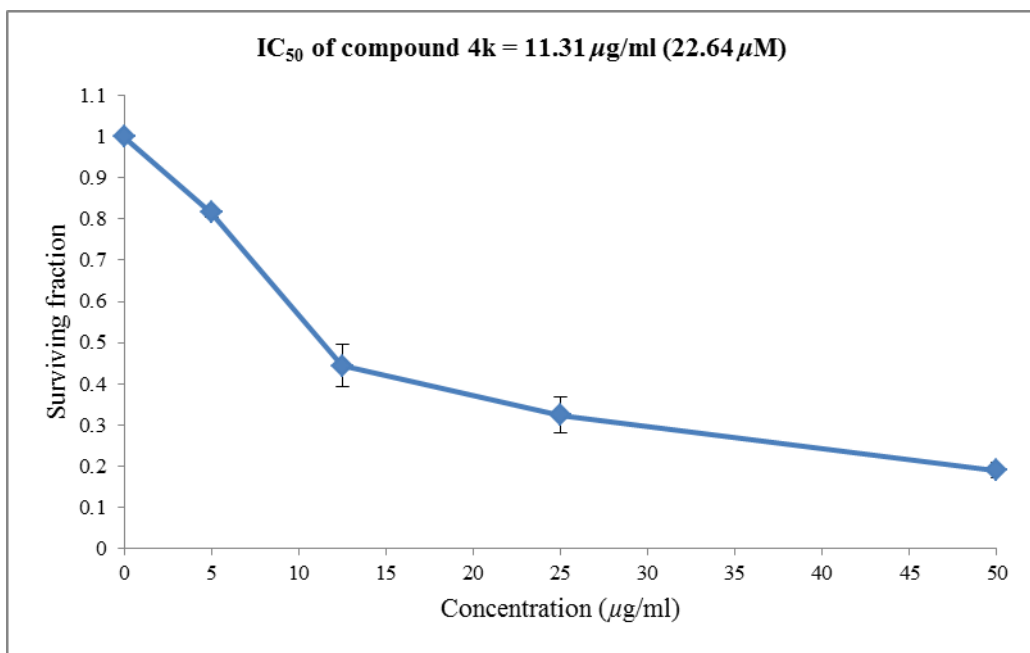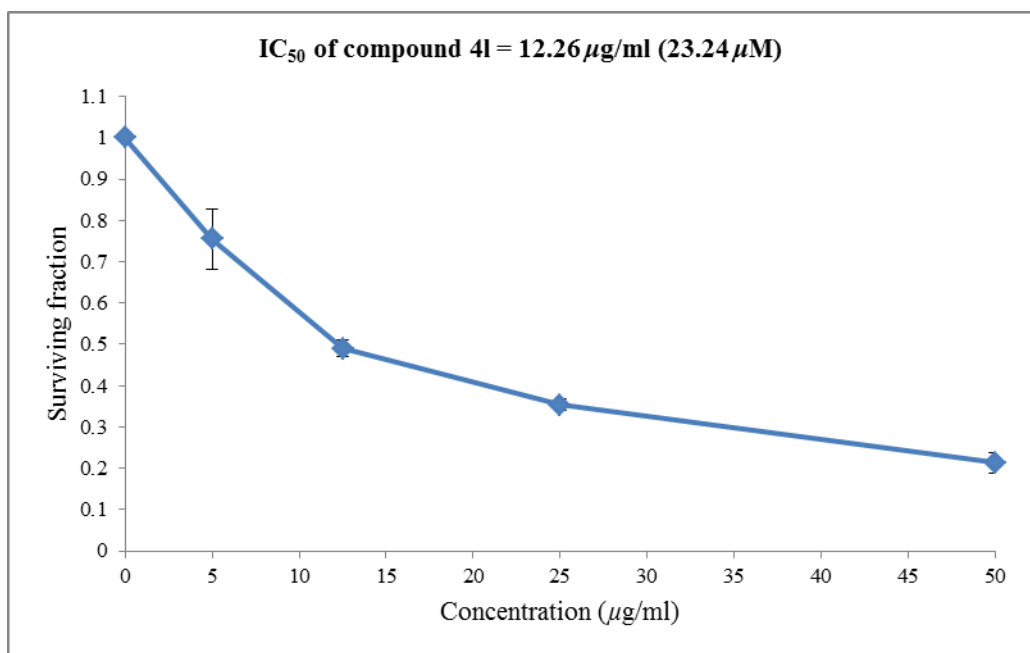

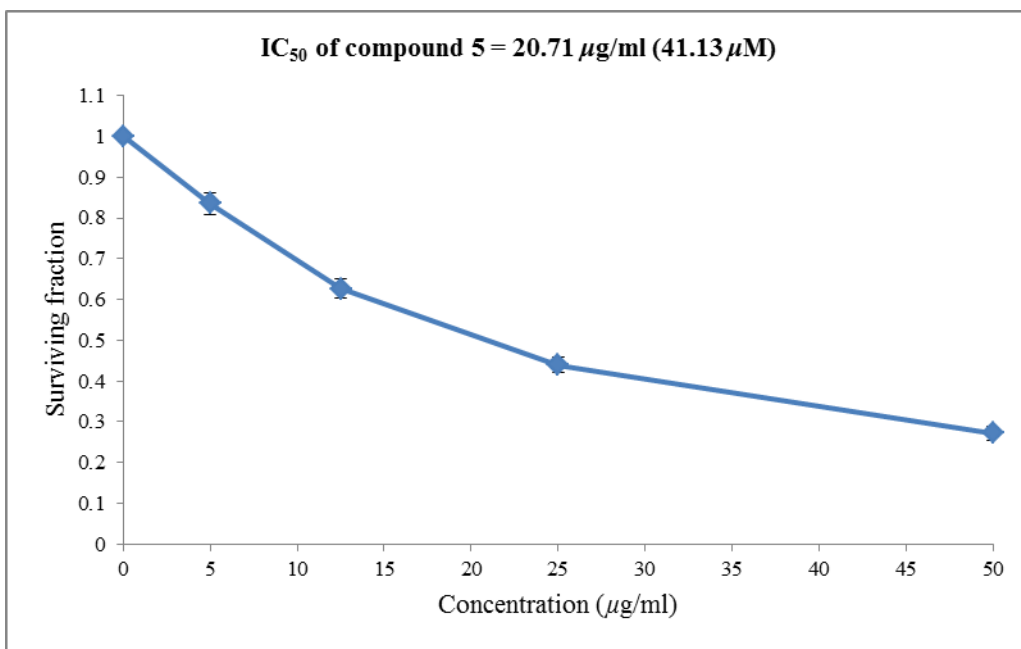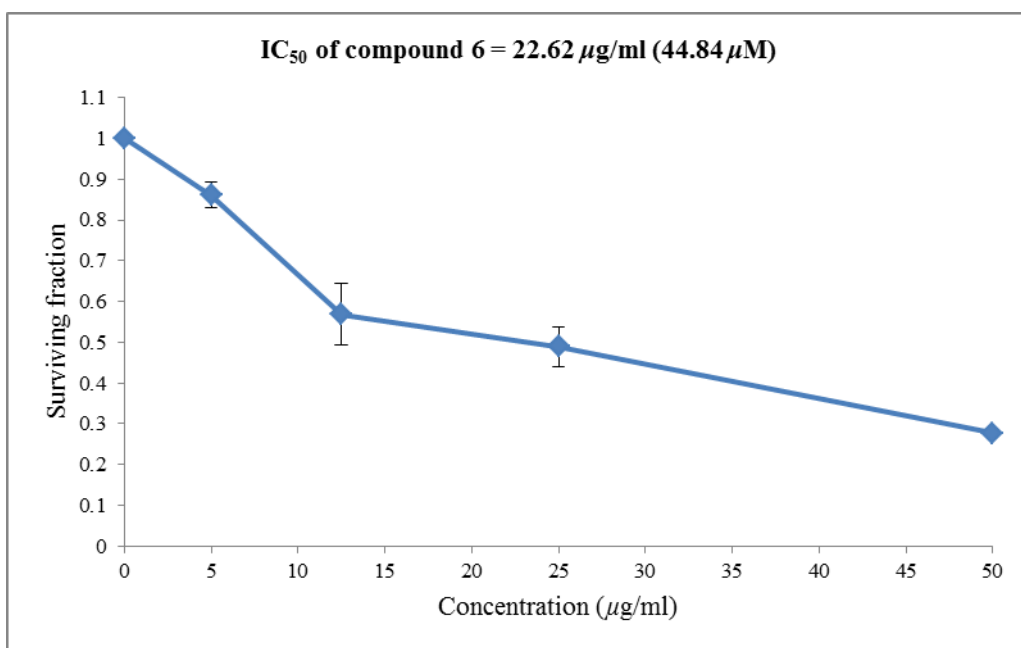

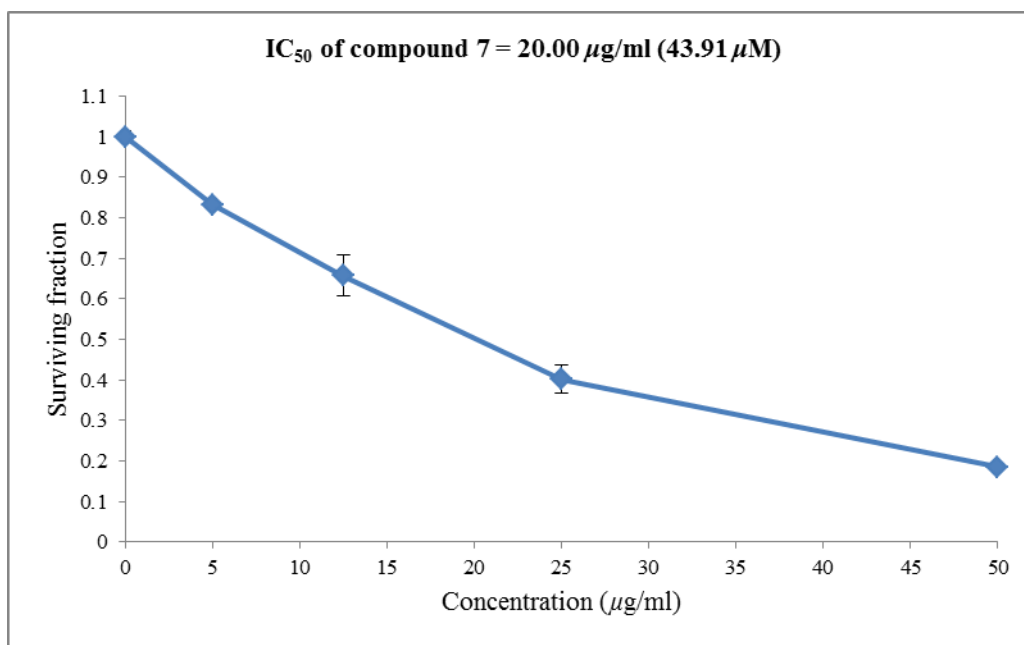

**Figure S3.** Dose-response curves of the macrocyclic peptidomimetics **4a-1**, and **5-7** against HepG2 (liver) human tumor cell line.

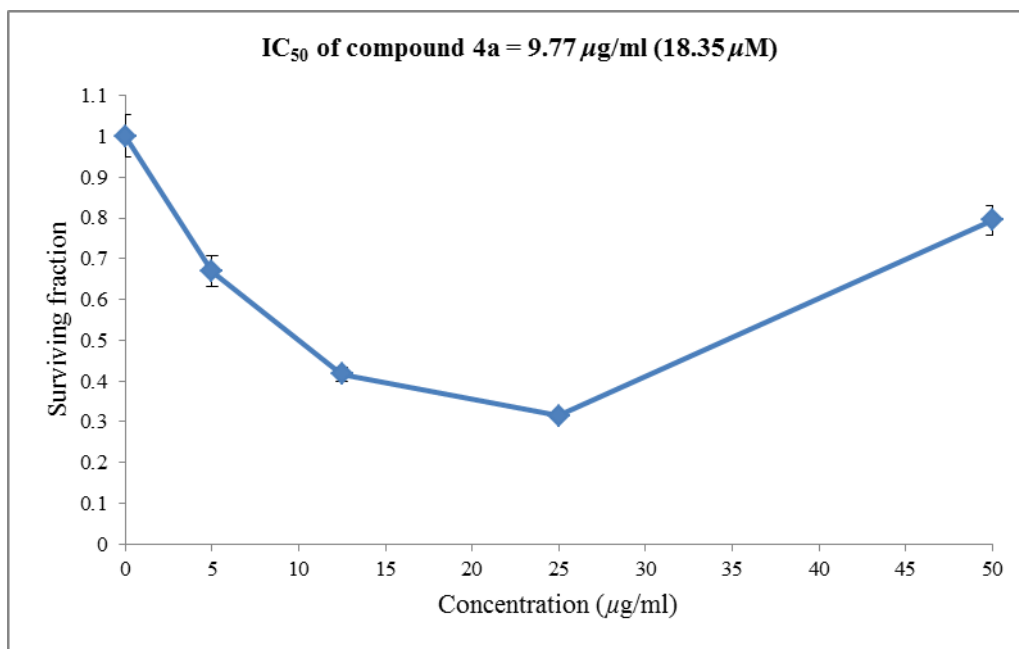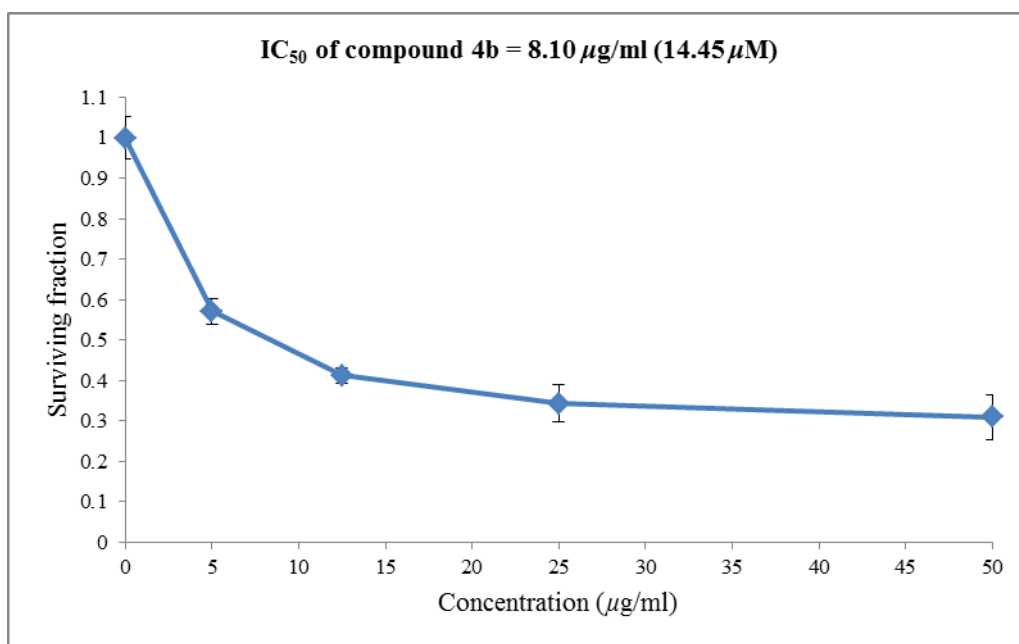

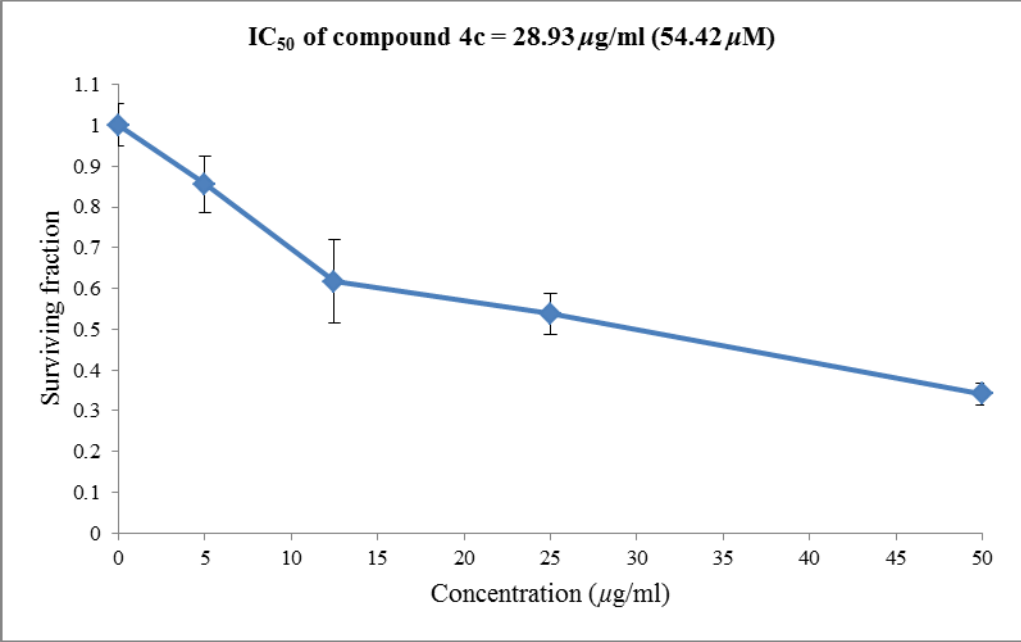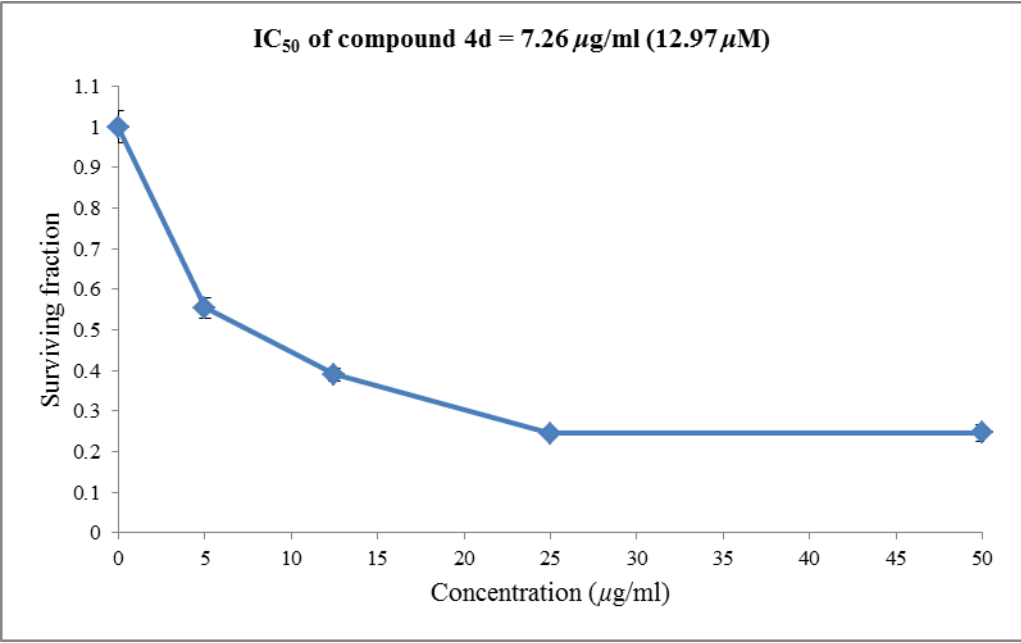



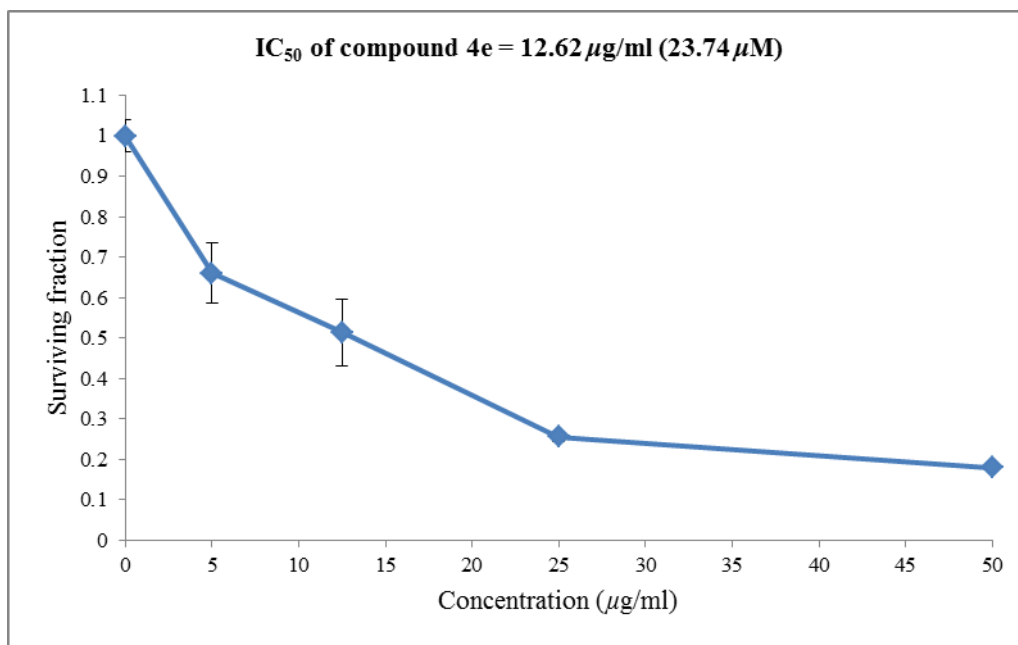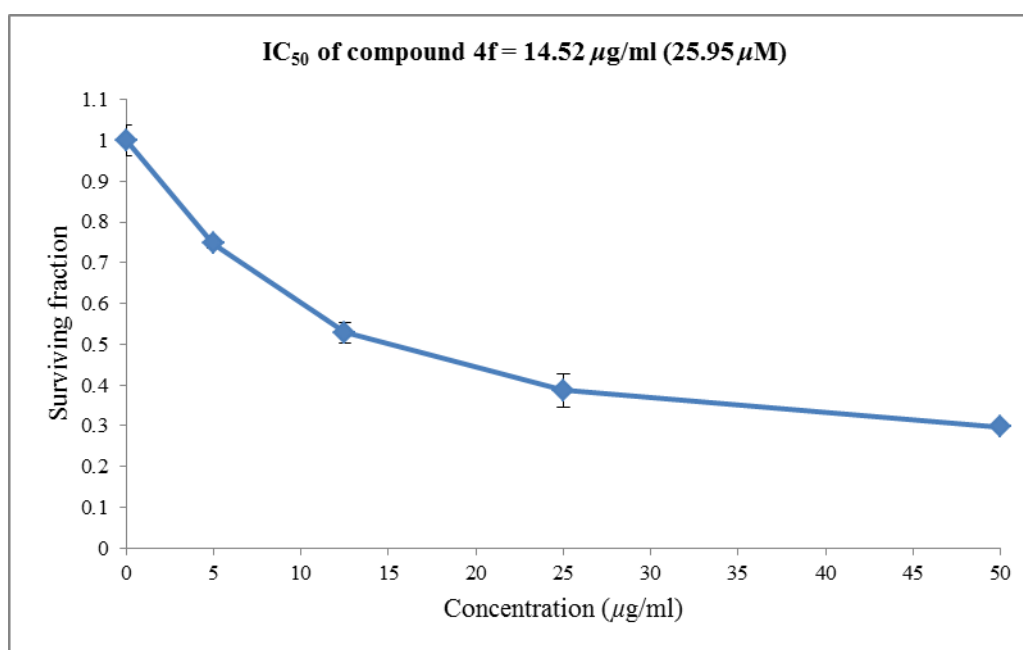

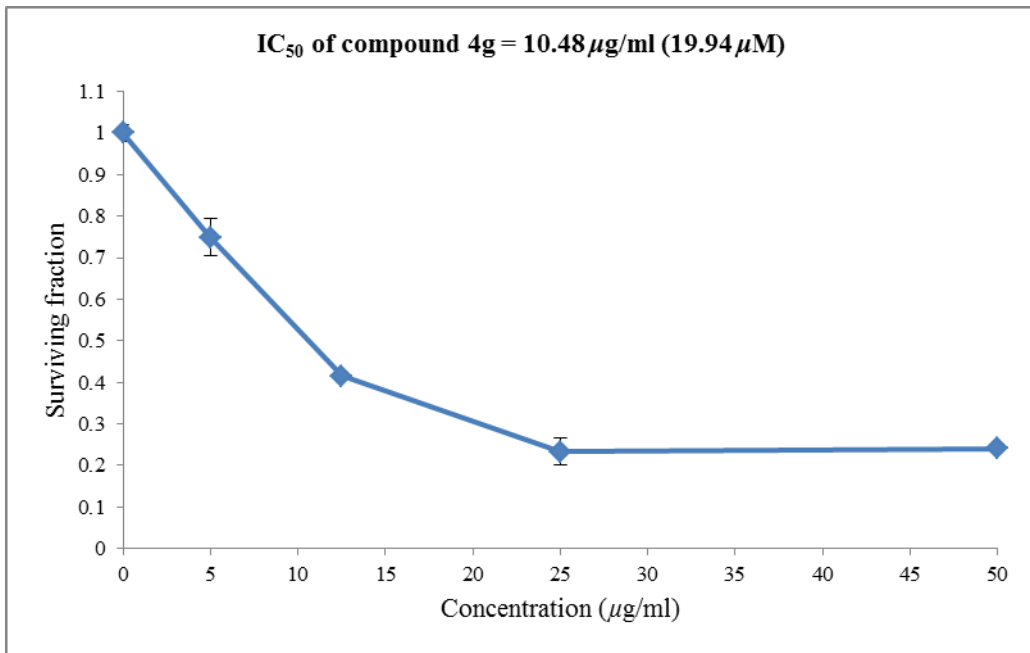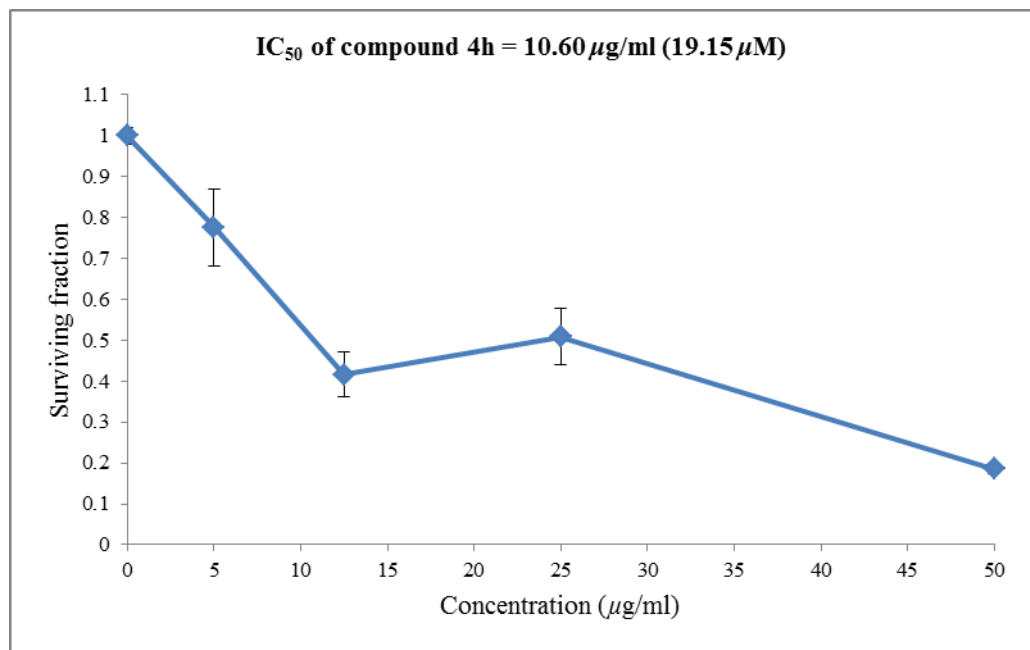

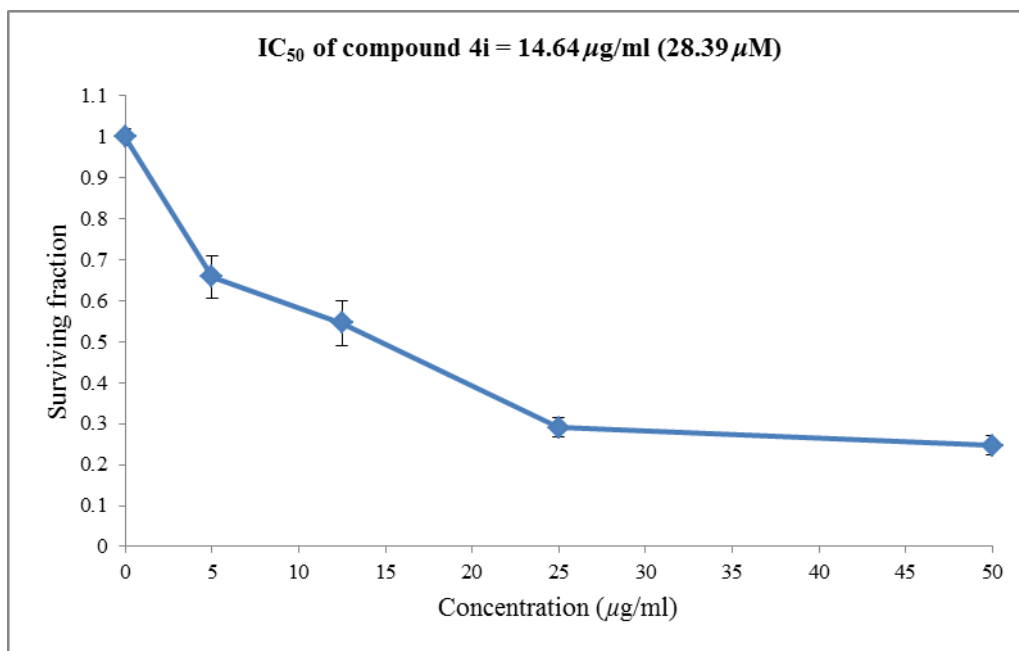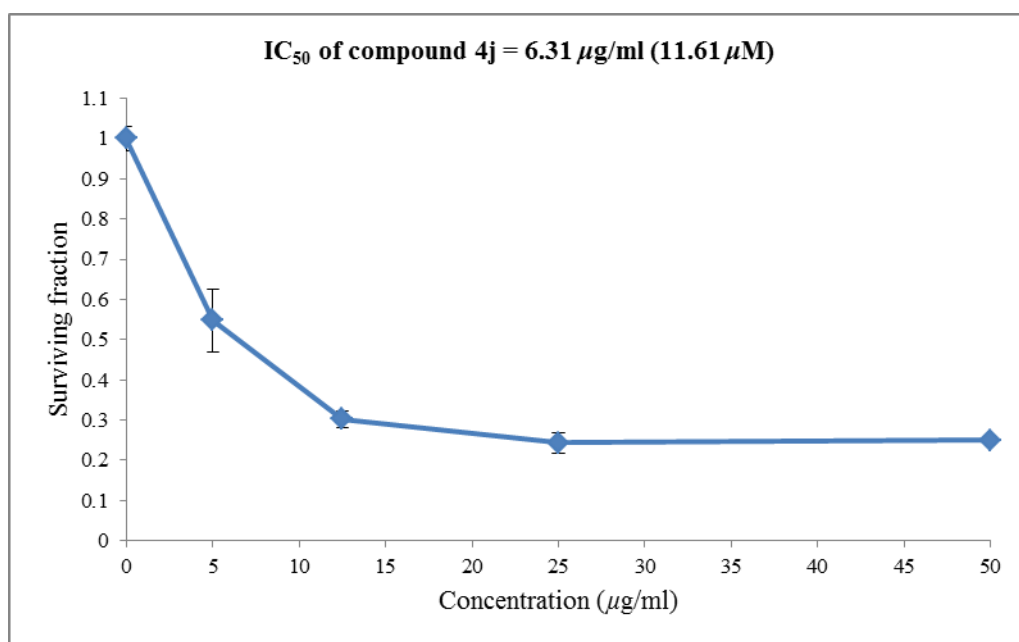

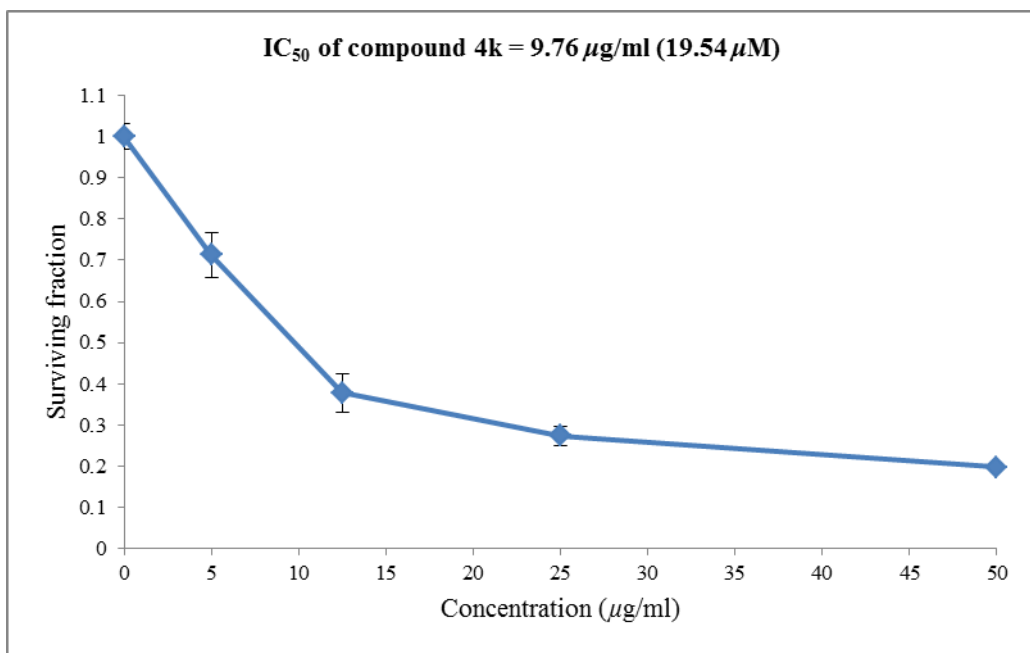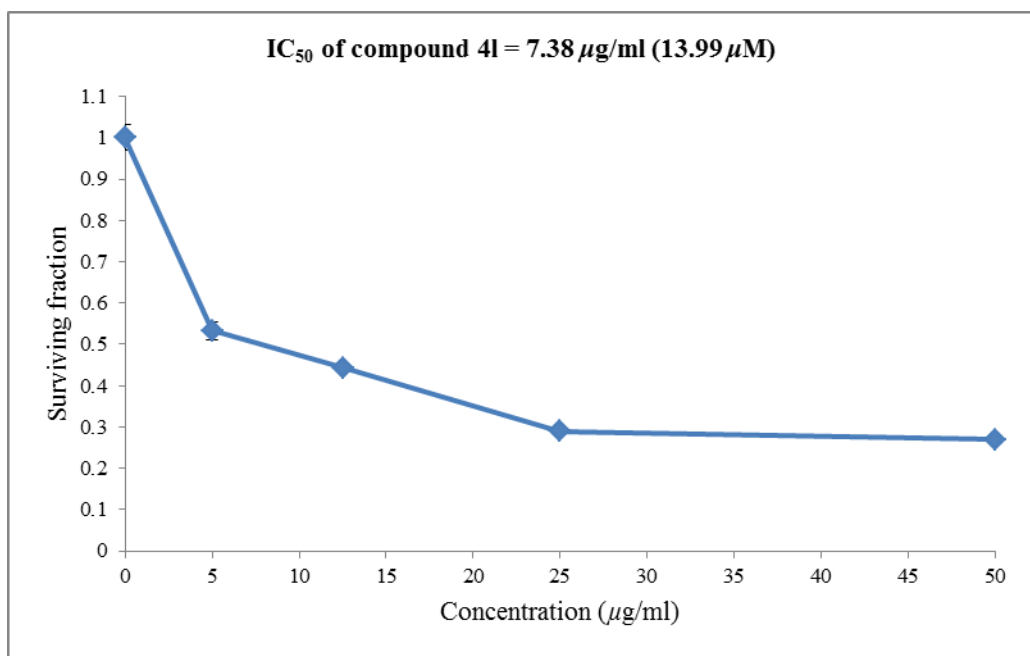

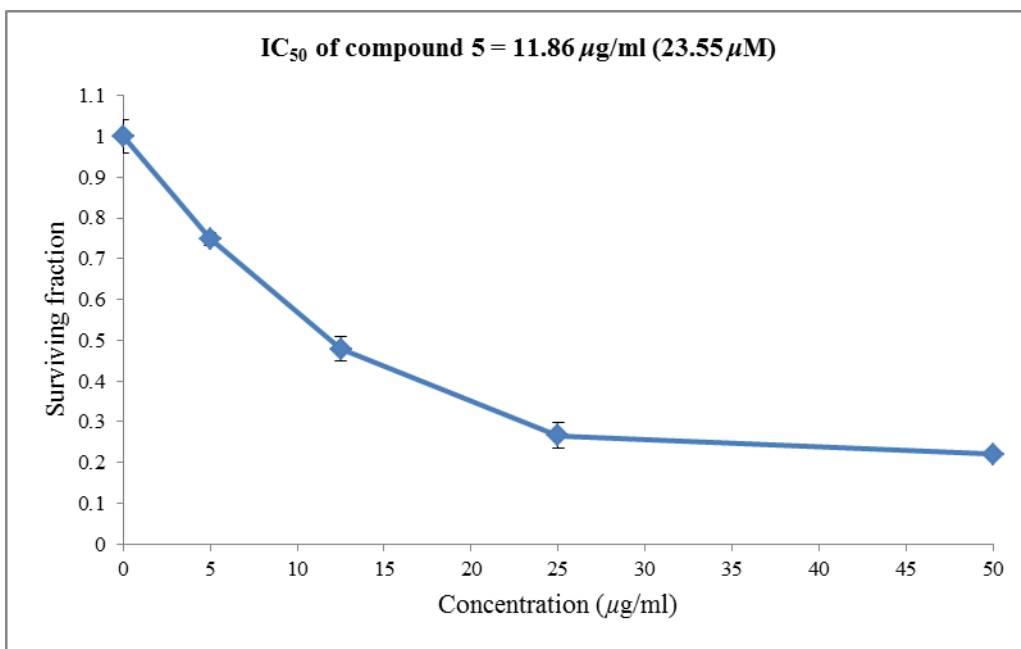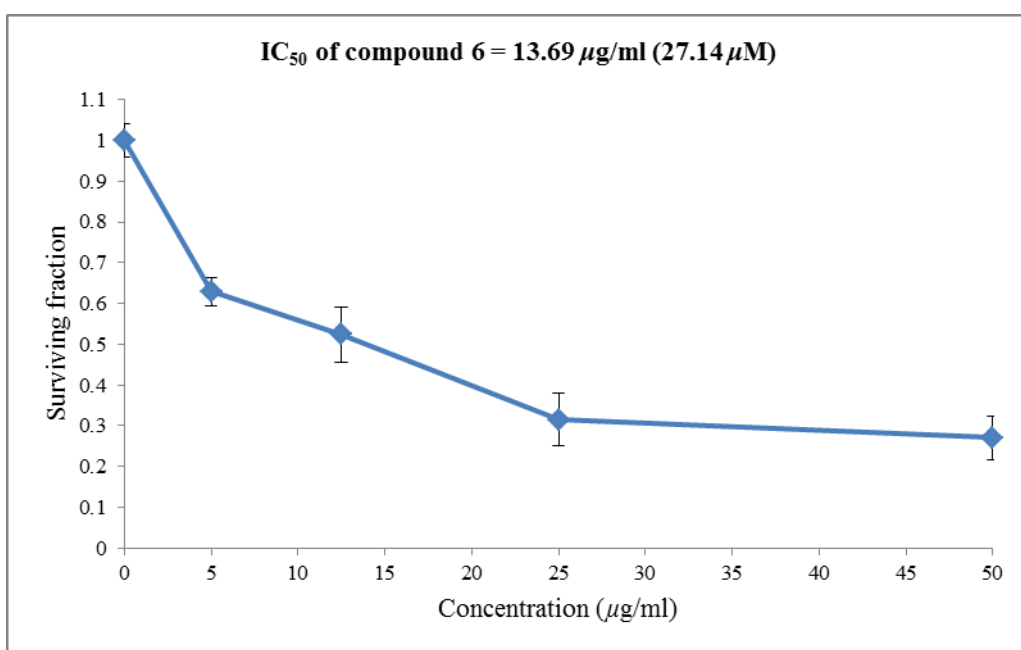

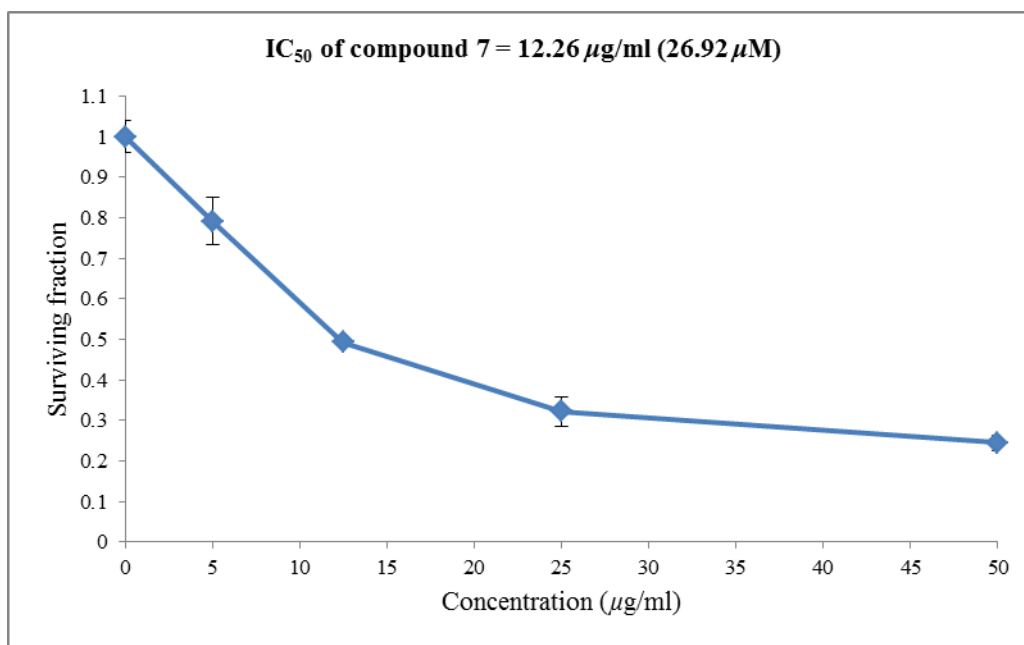

**Figure S4.** Dose-response curves of the macrocyclic peptidomimetics **4a-1**, and **5-7** against HeLa (cervical) human tumor cell line.

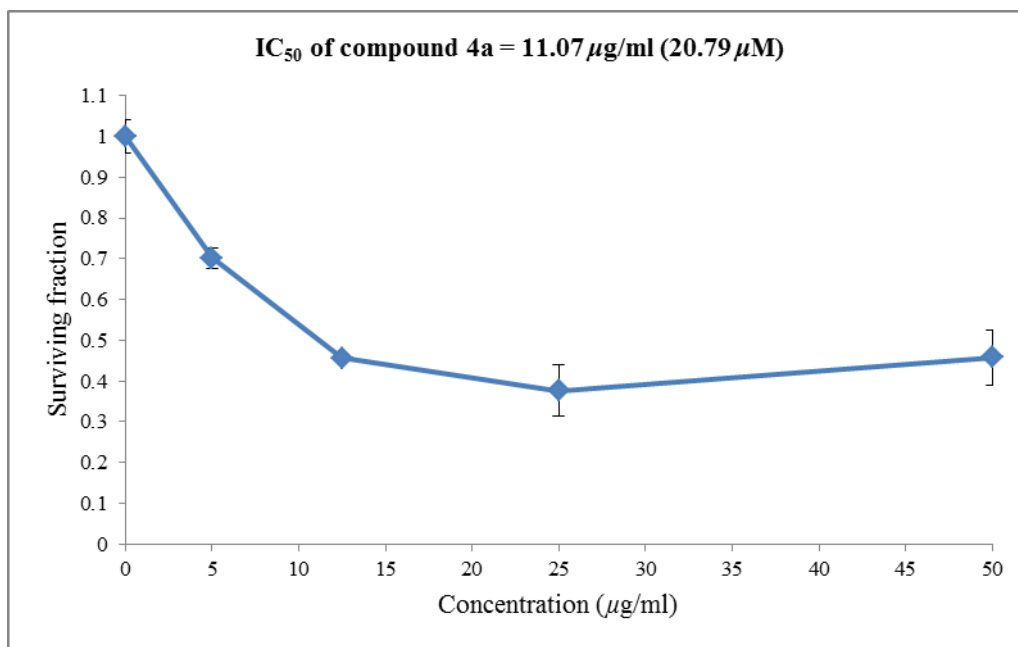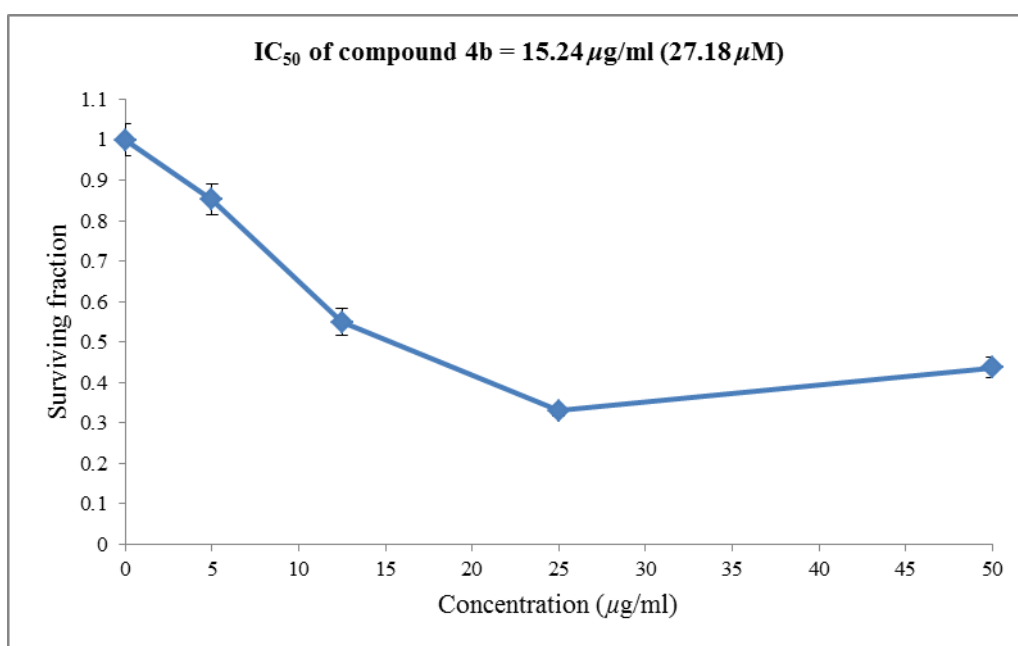

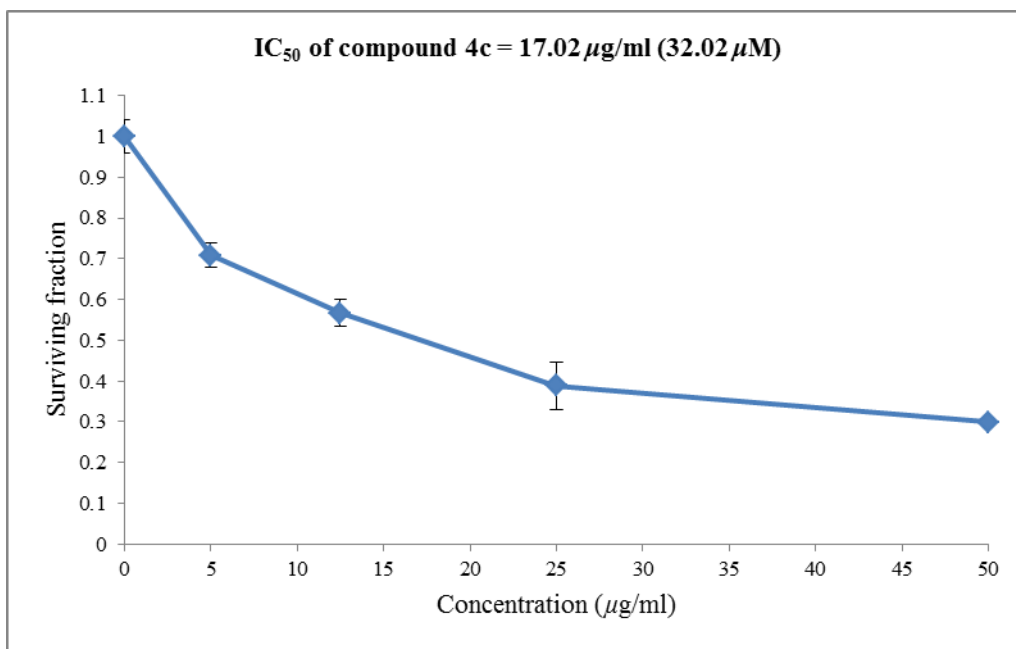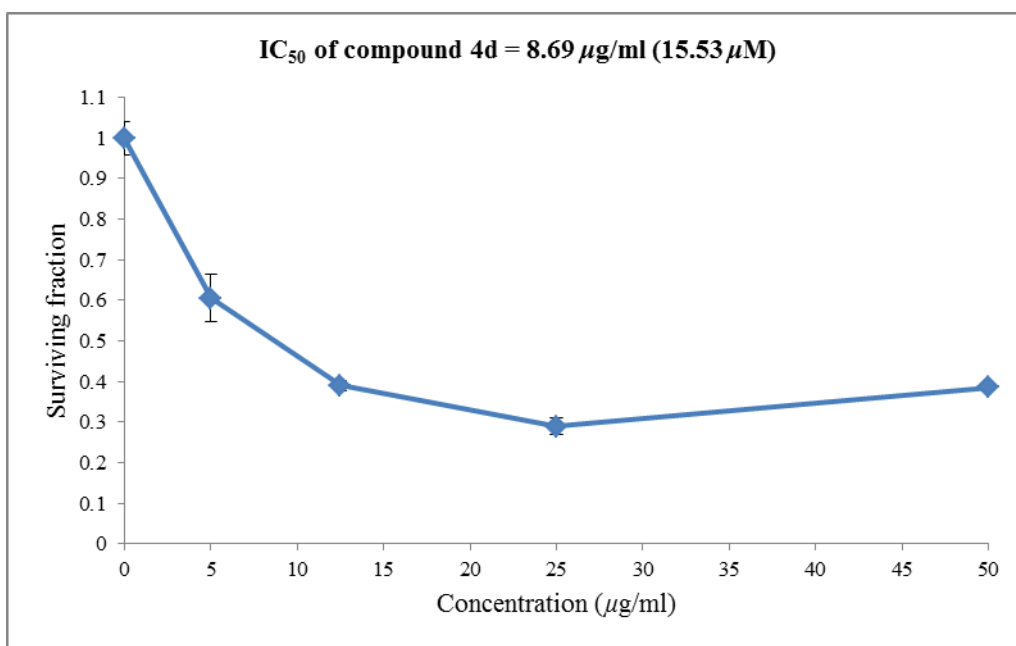



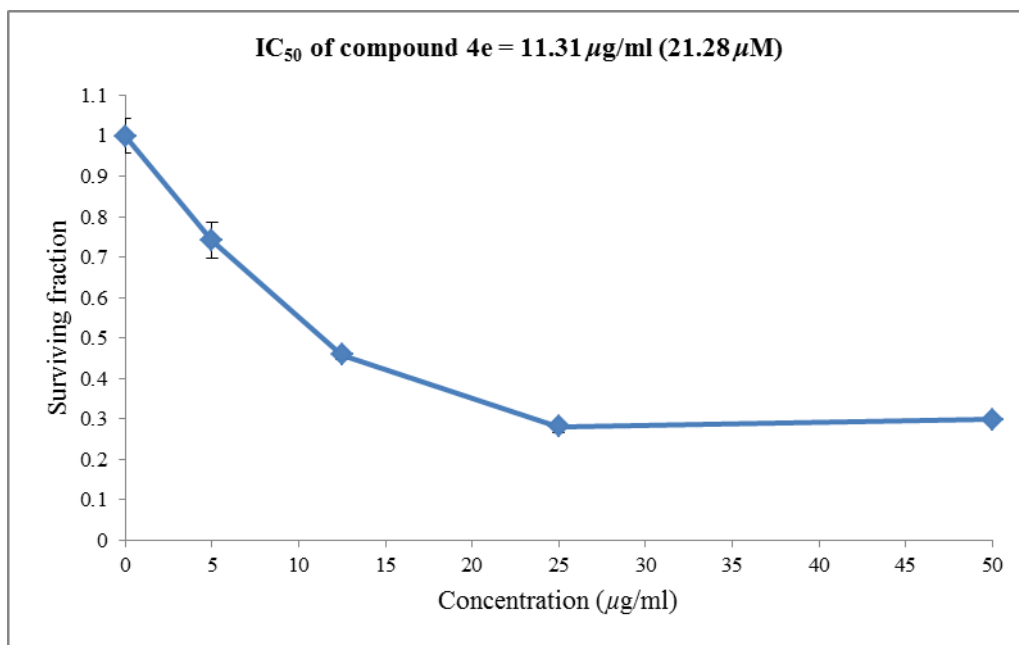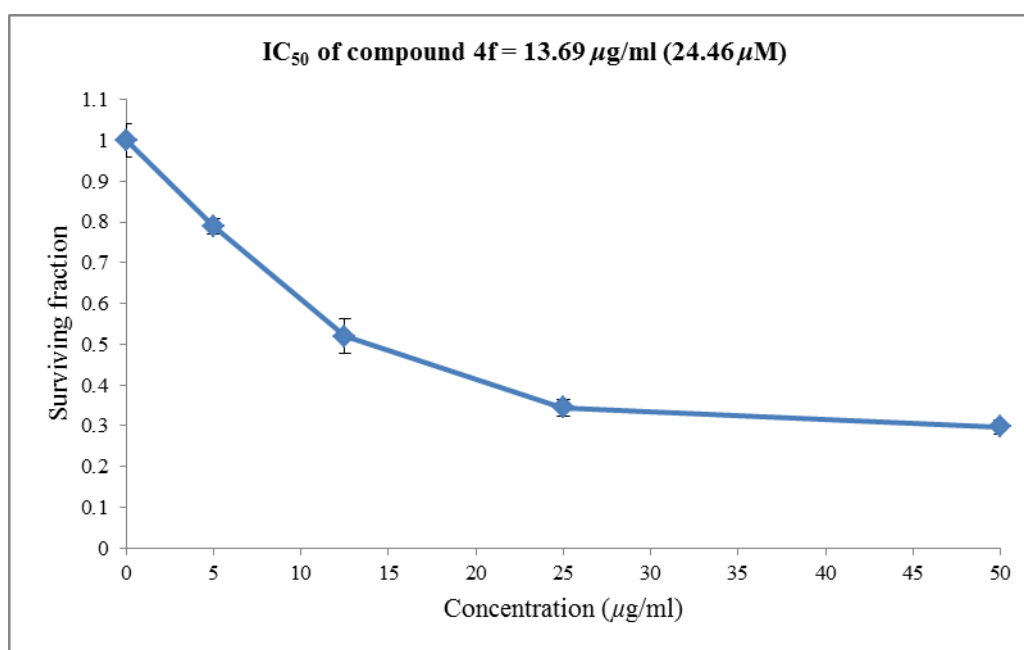

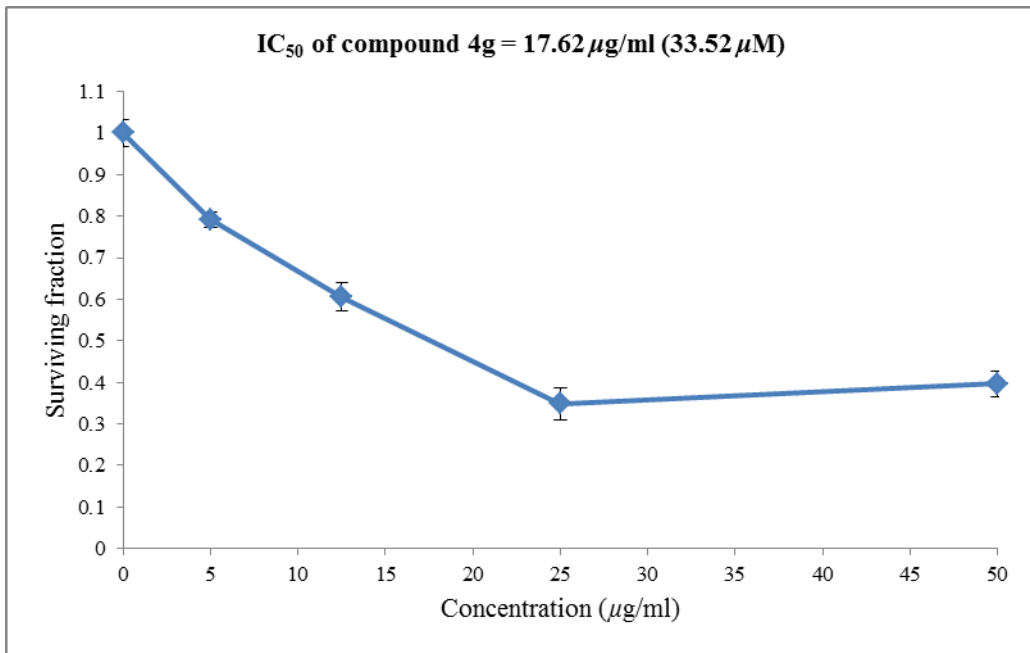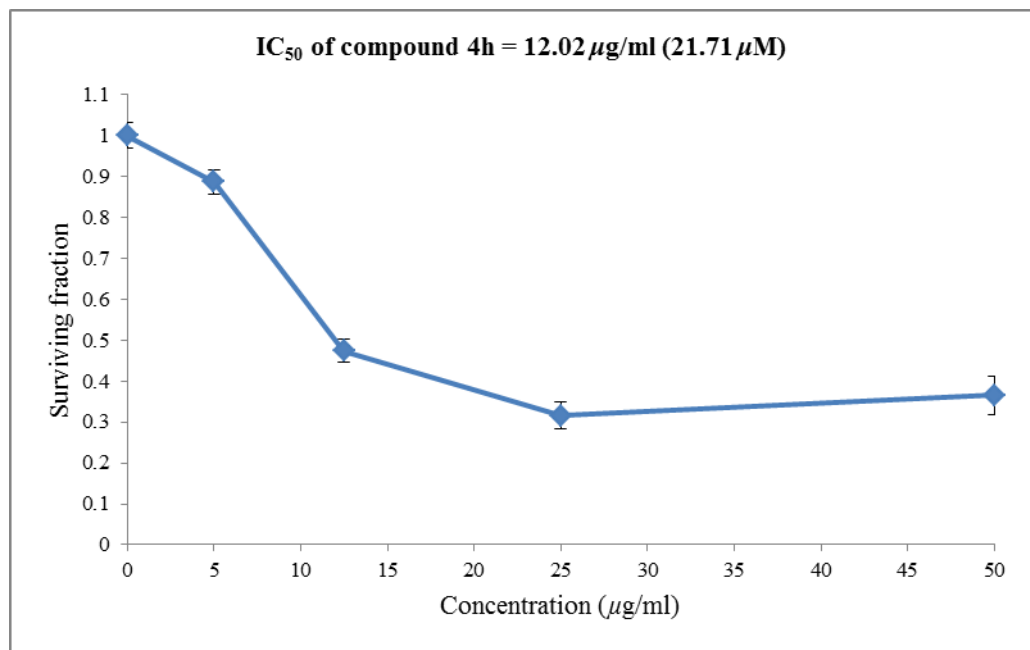

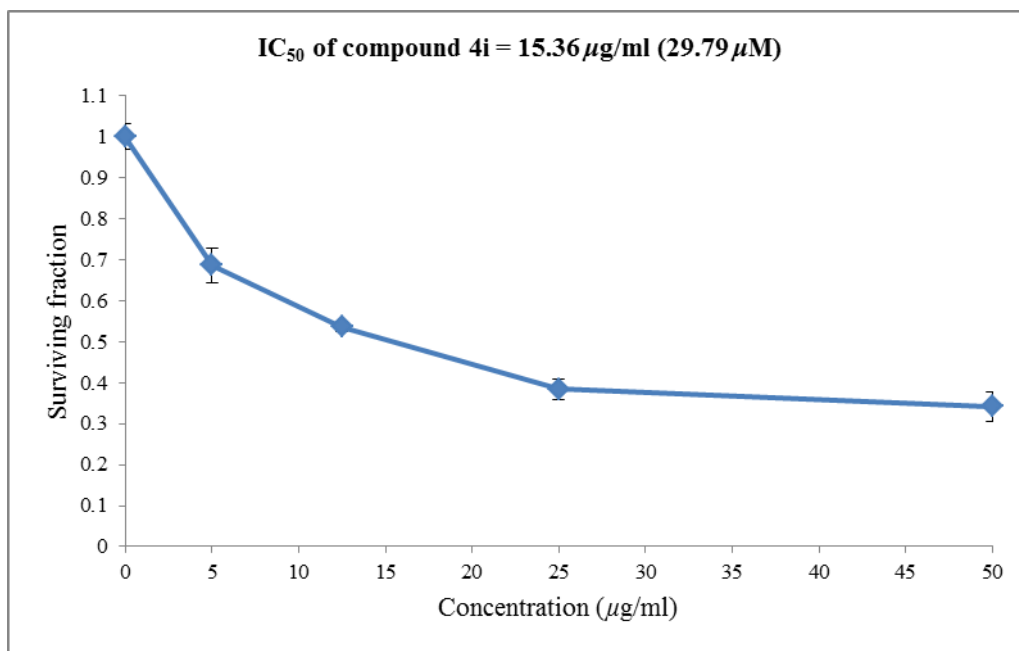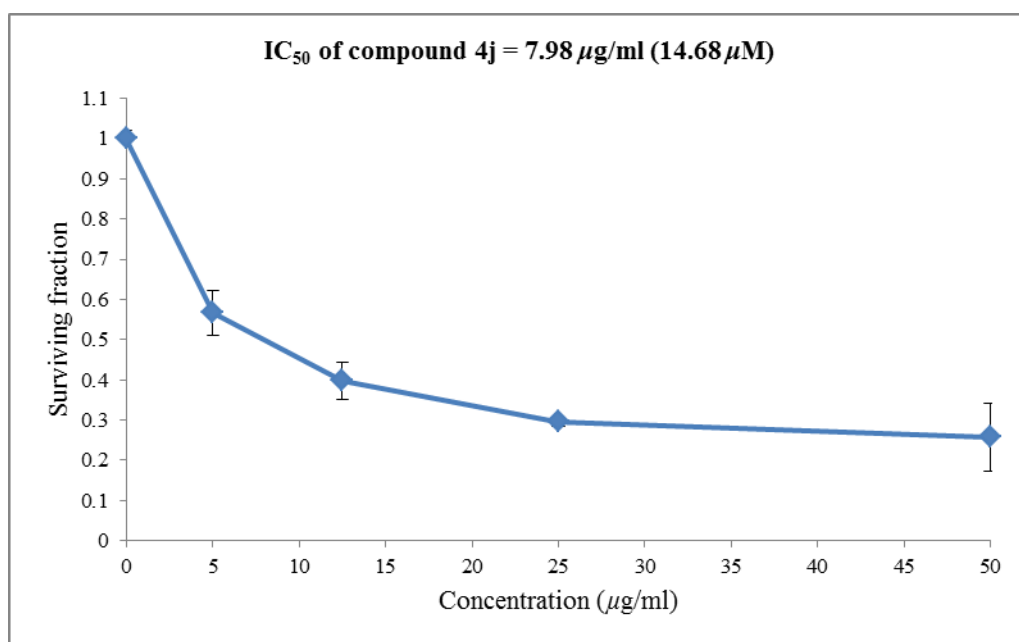

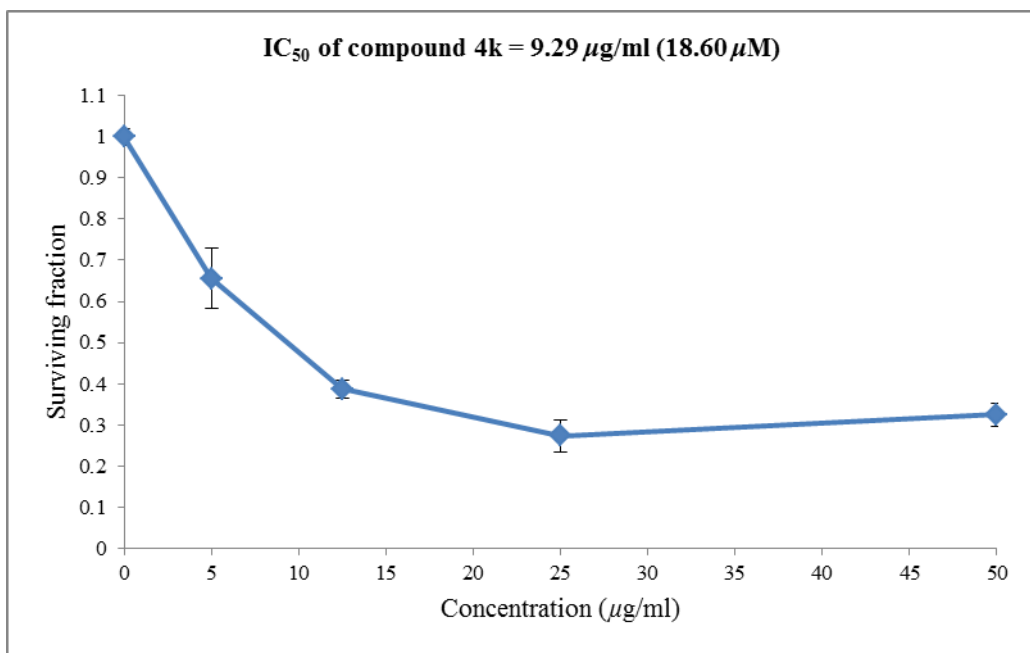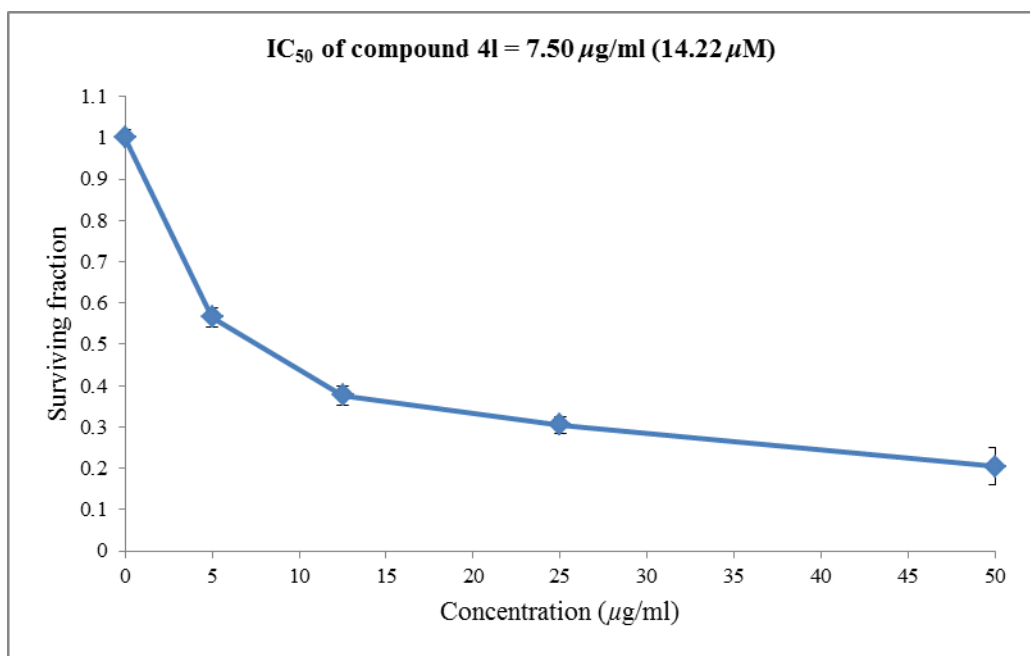

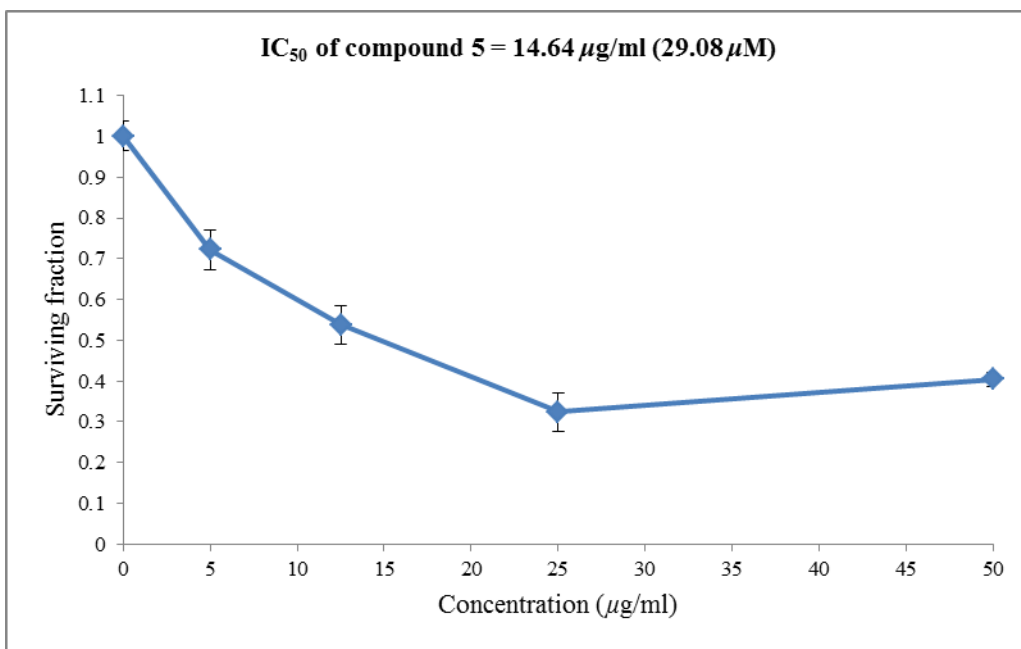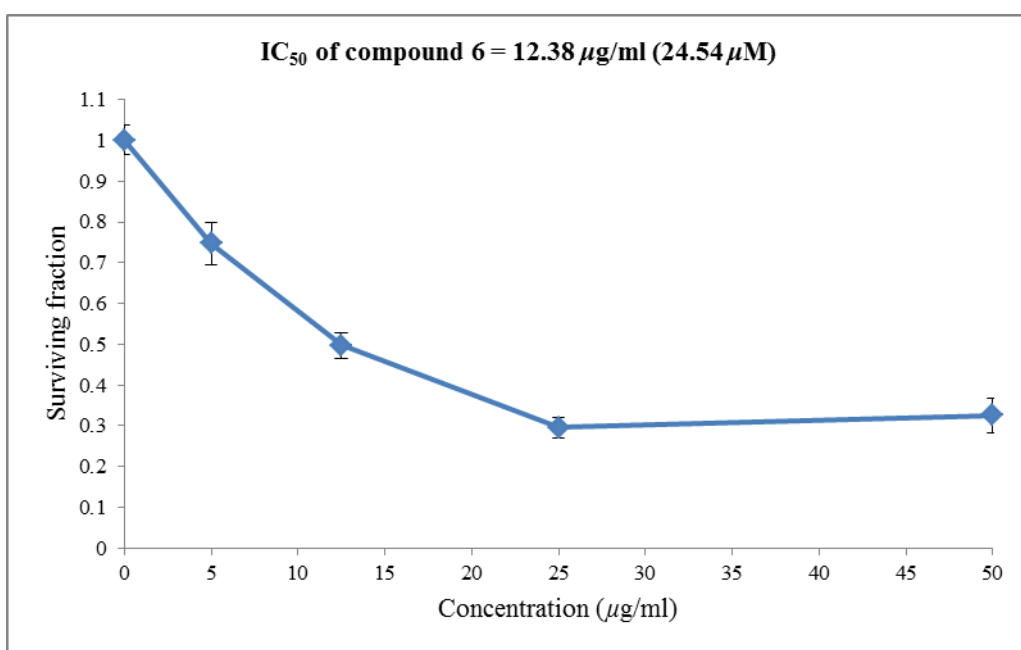

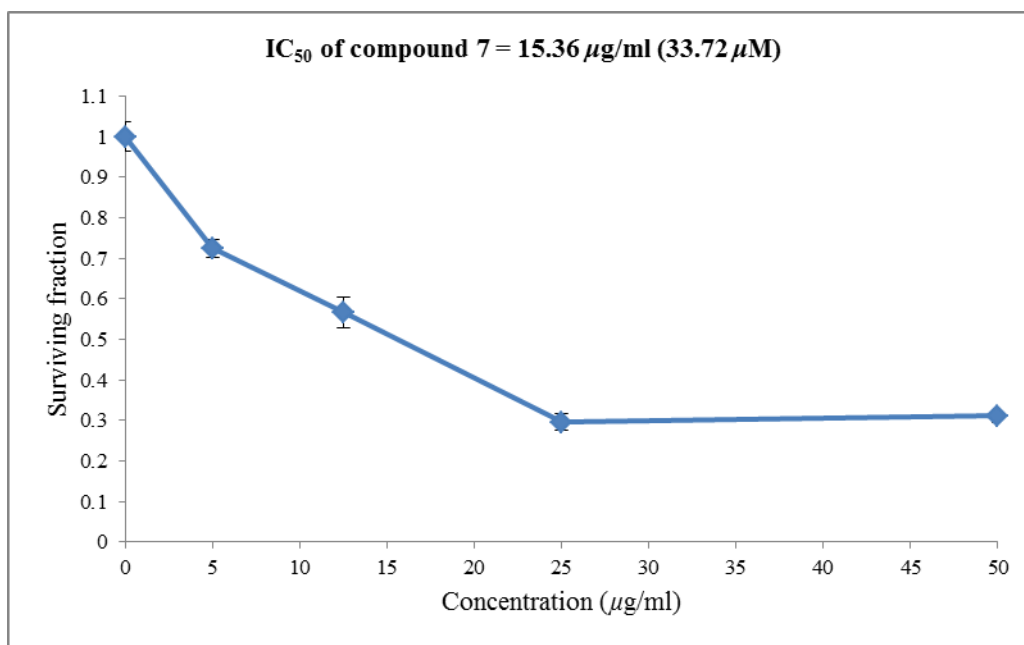

**Figure S5.** Dose-response curves of the macrocyclic peptidomimetics **4a-1**, and **5-7** against HCT116 (colon) human tumor cell line.

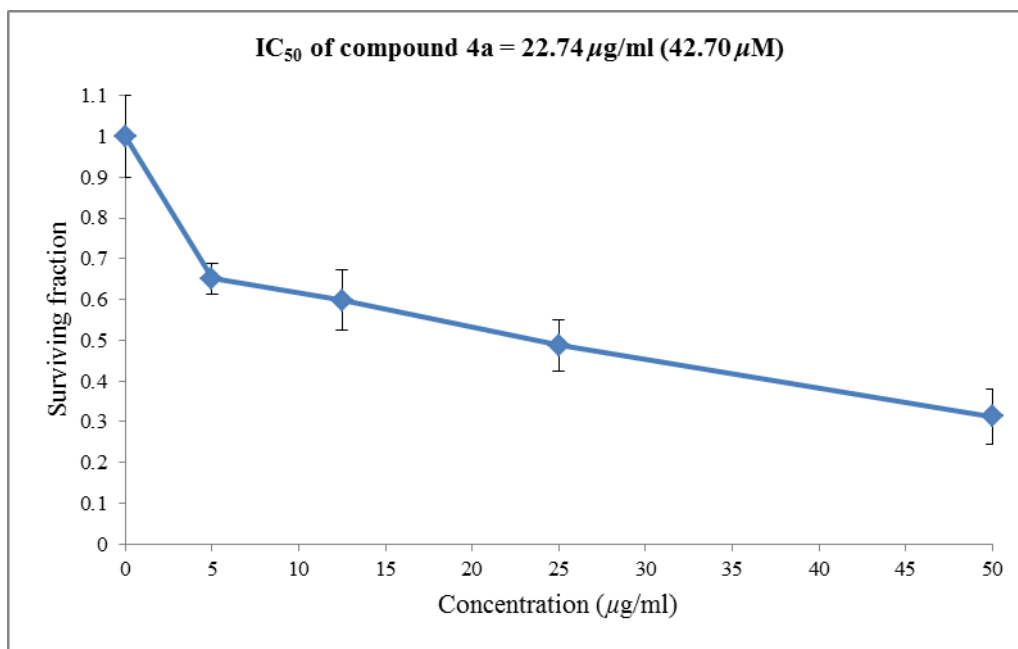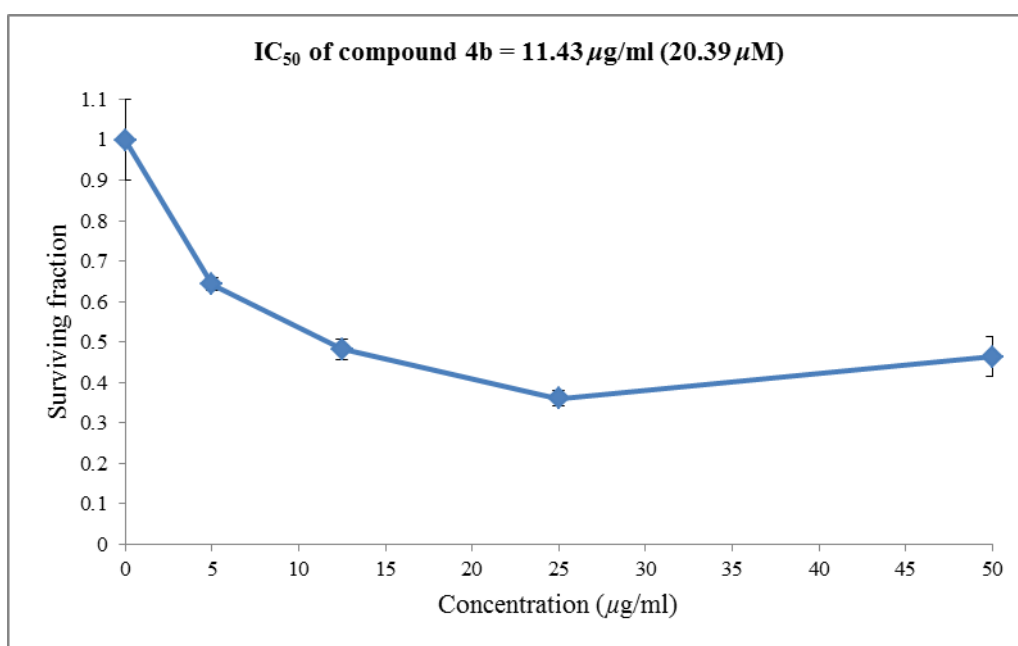

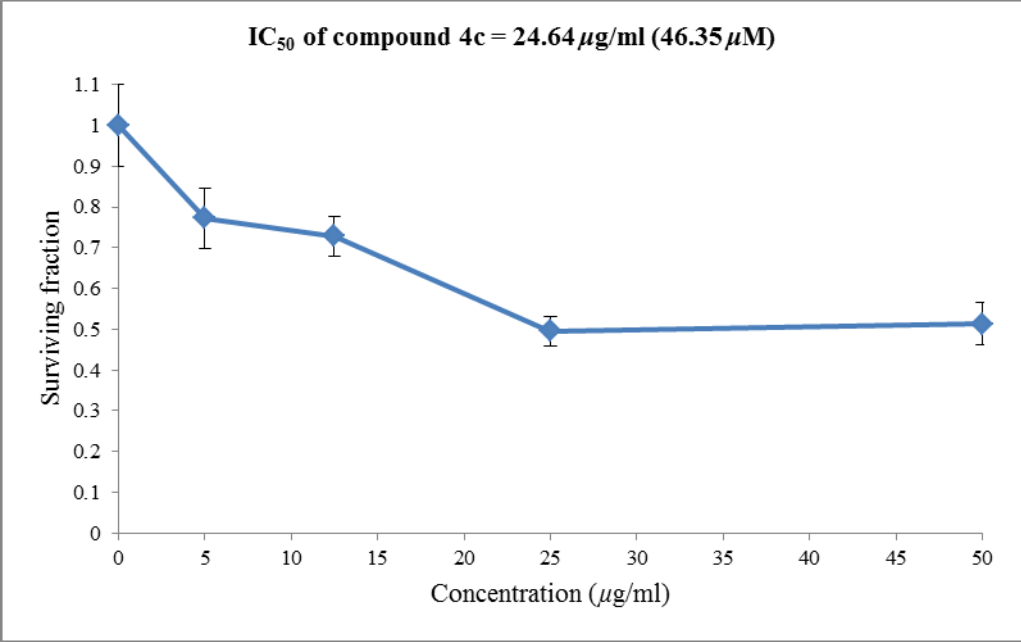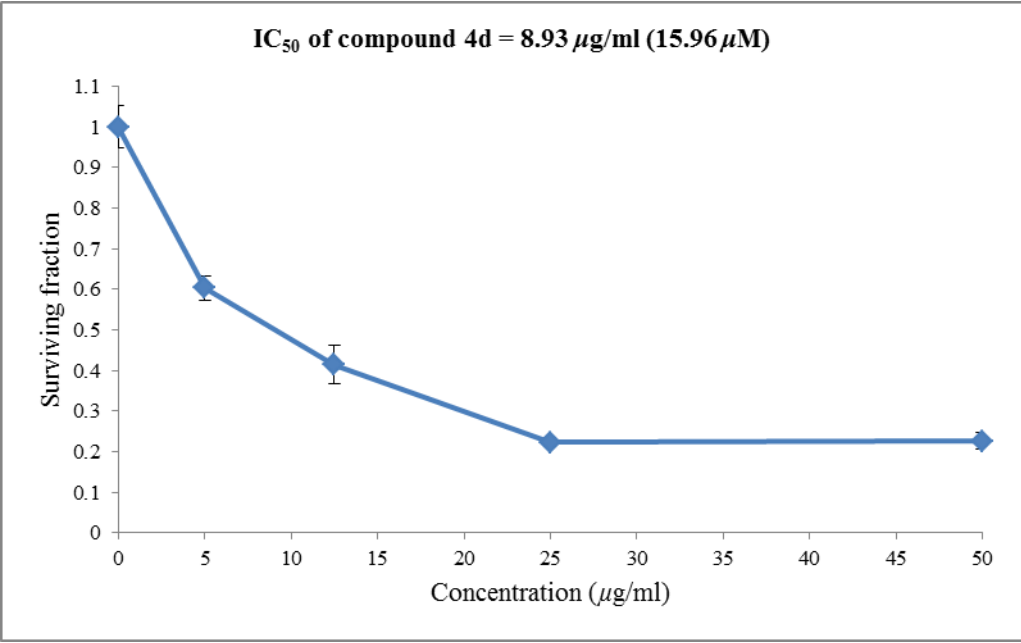



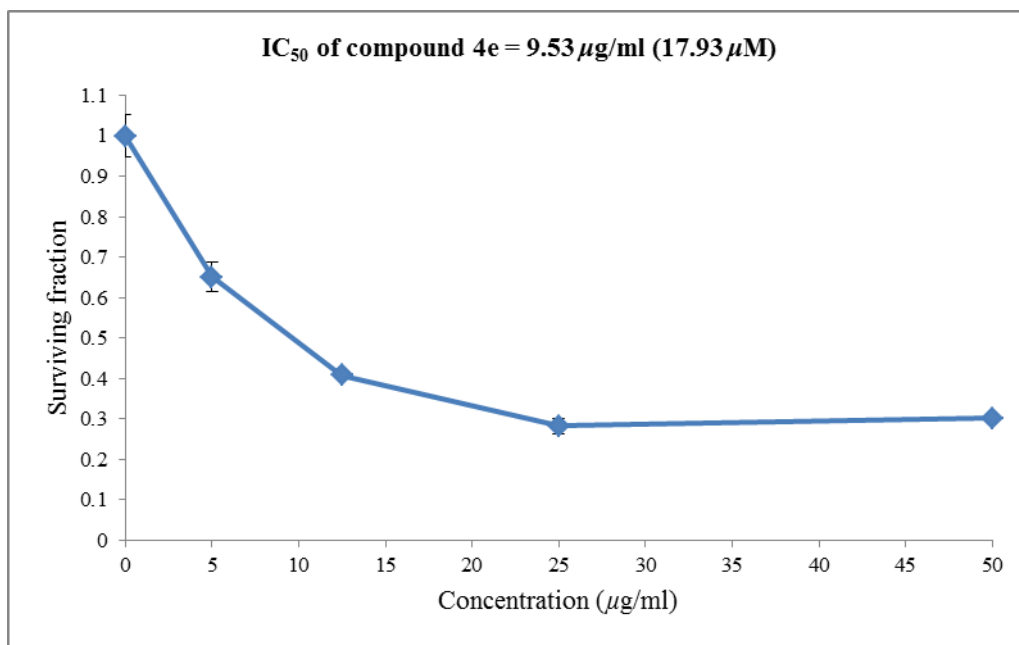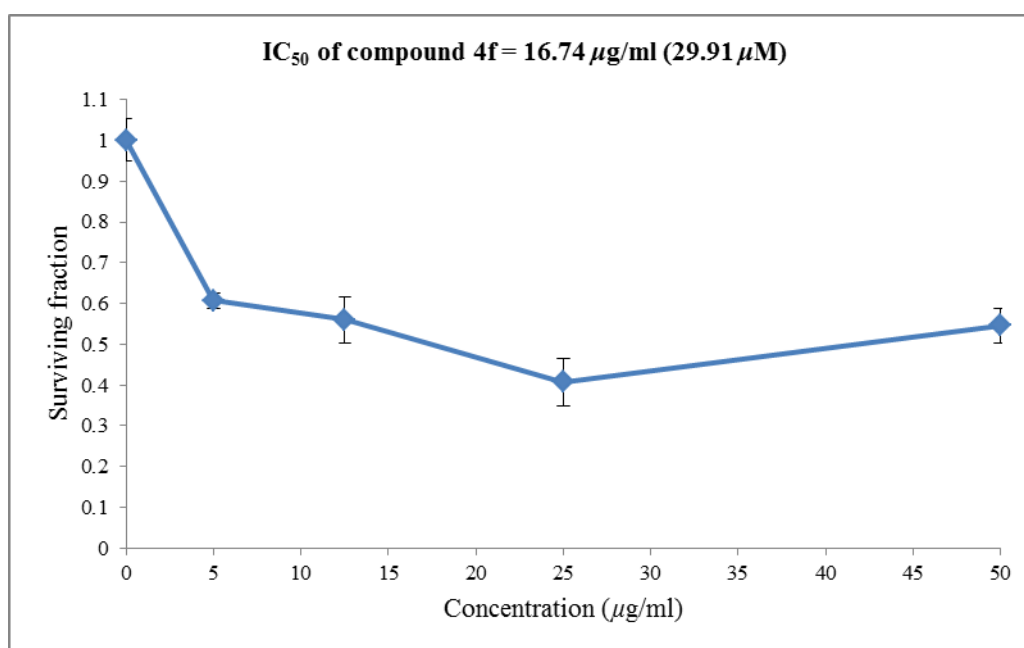

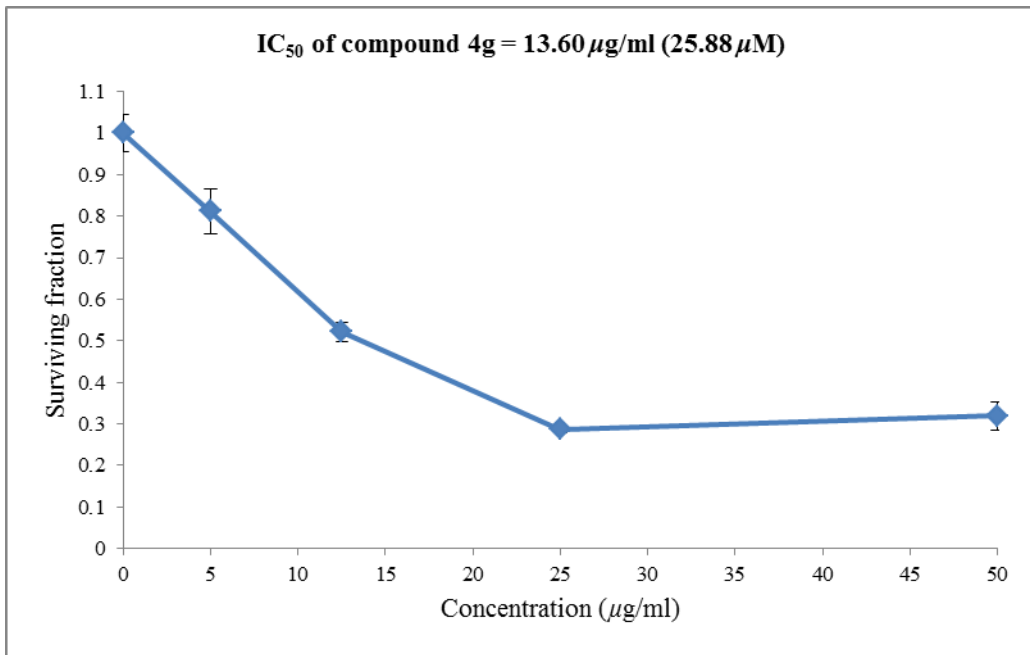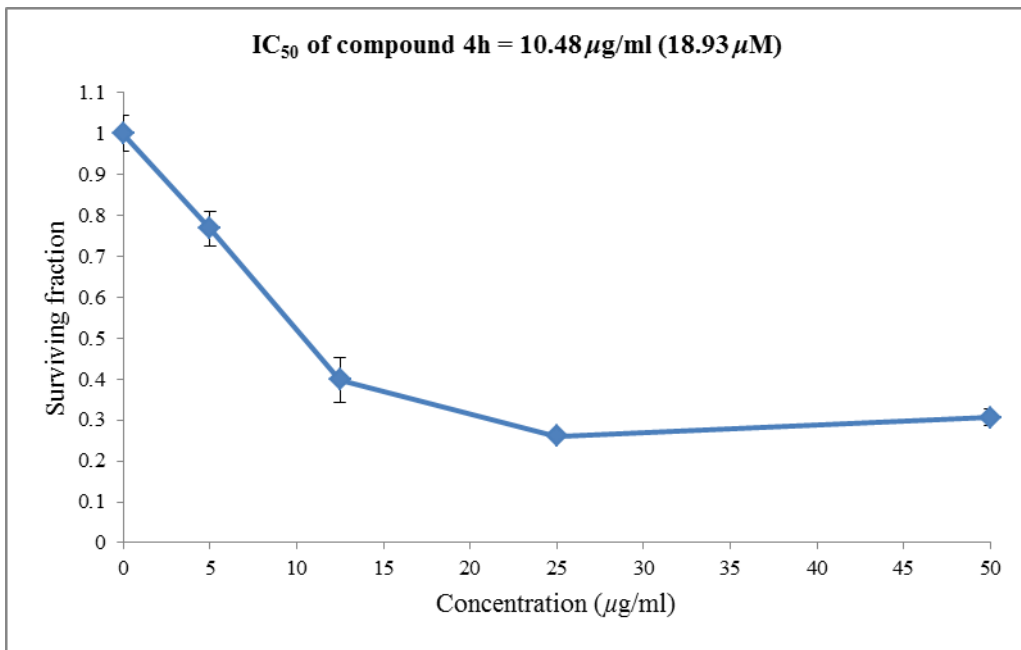

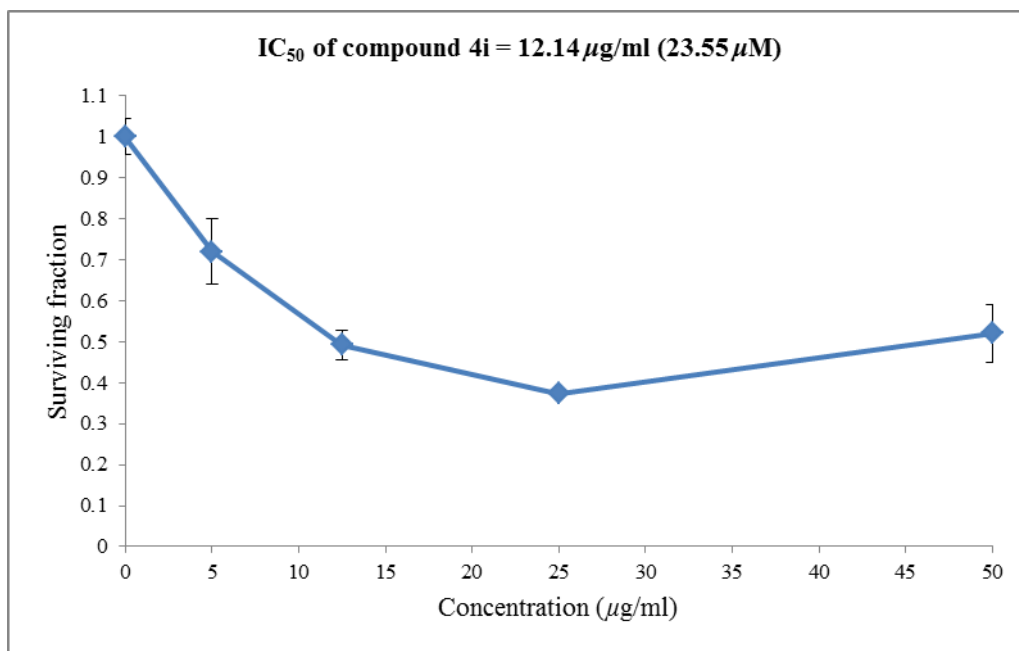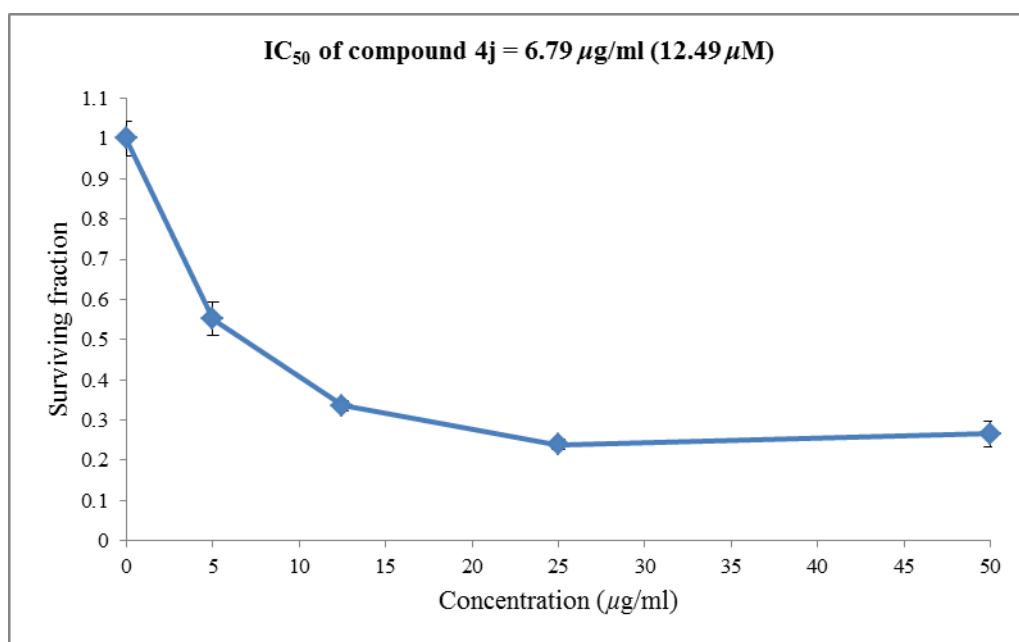

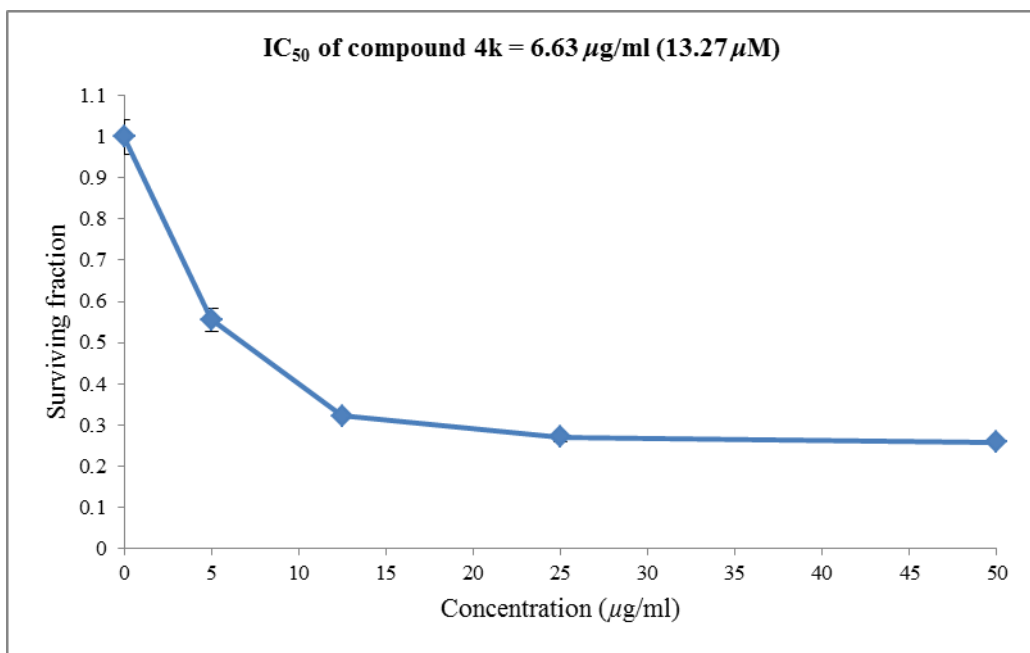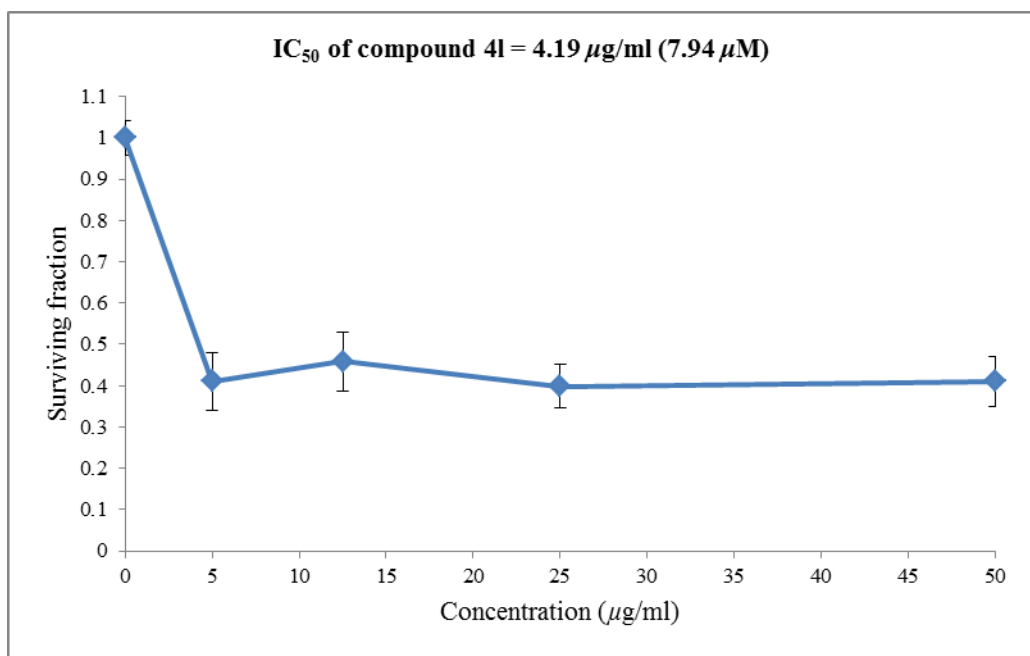

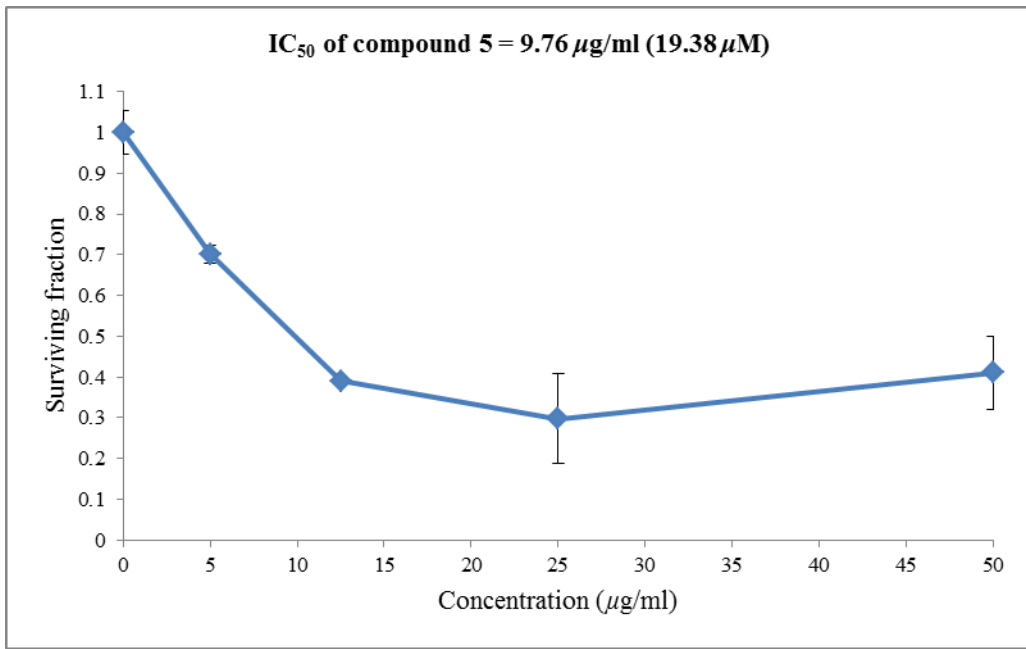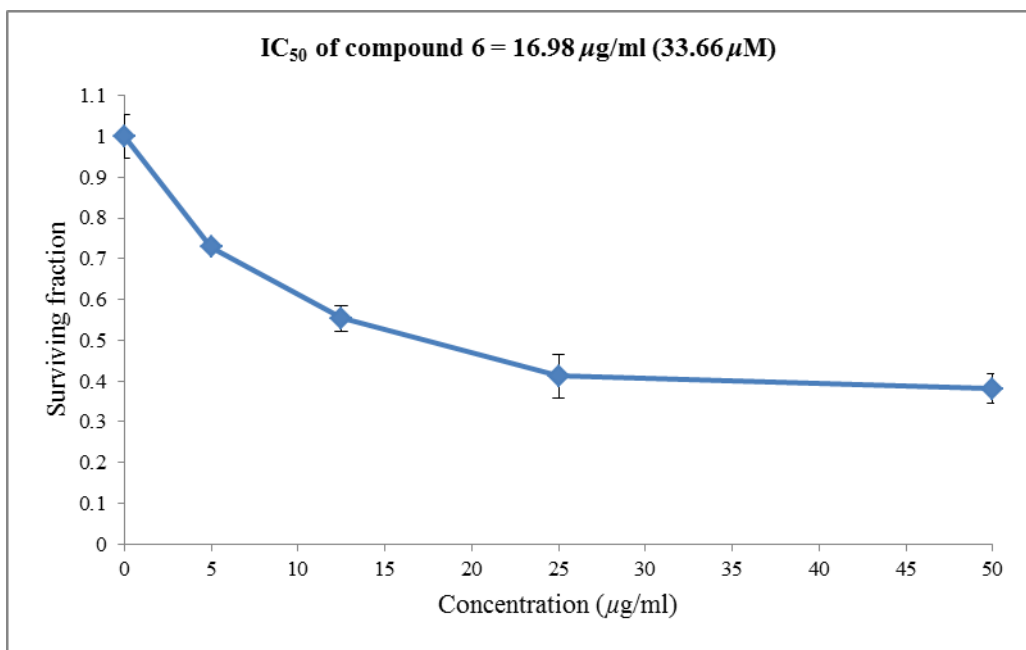

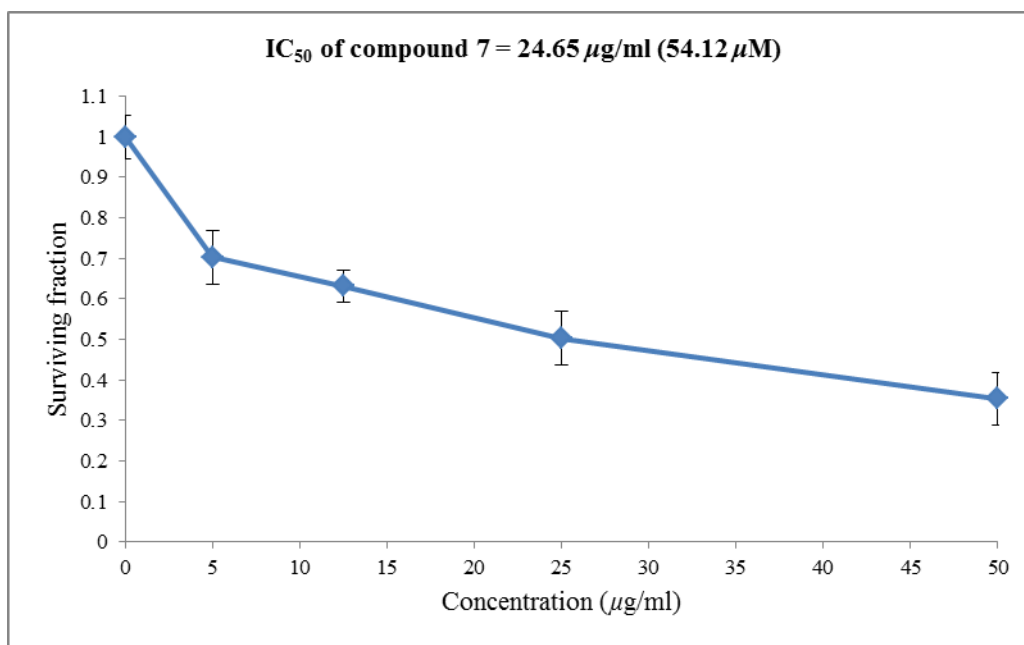

**Figure S6.** Dose-response curves of the macrocyclic peptidomimetics **4a-1**, and **5-7** against PC3 (prostate) human tumor cell line.

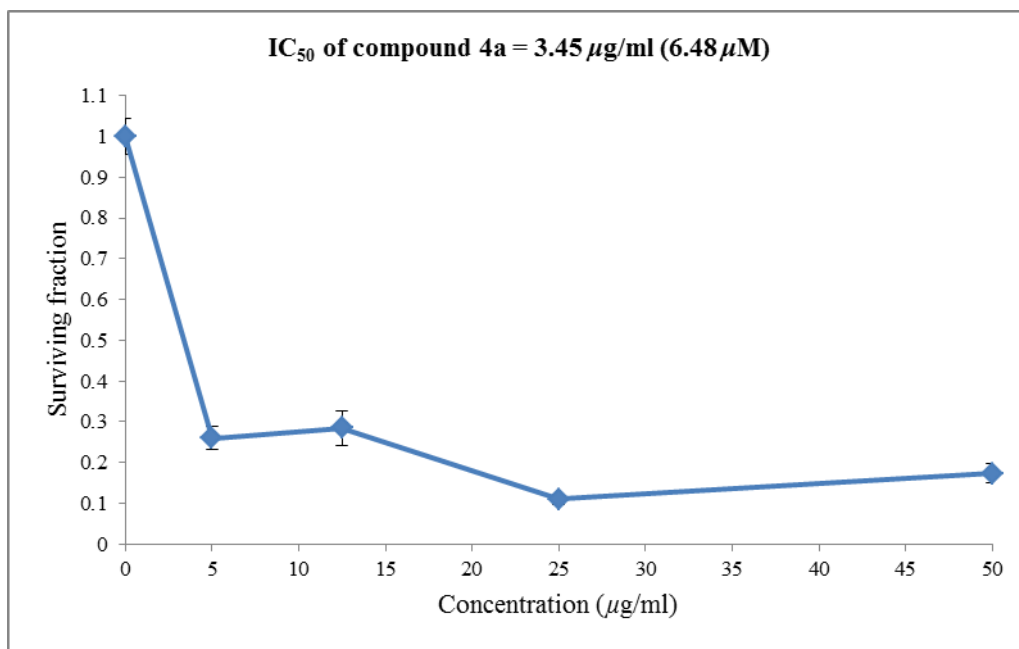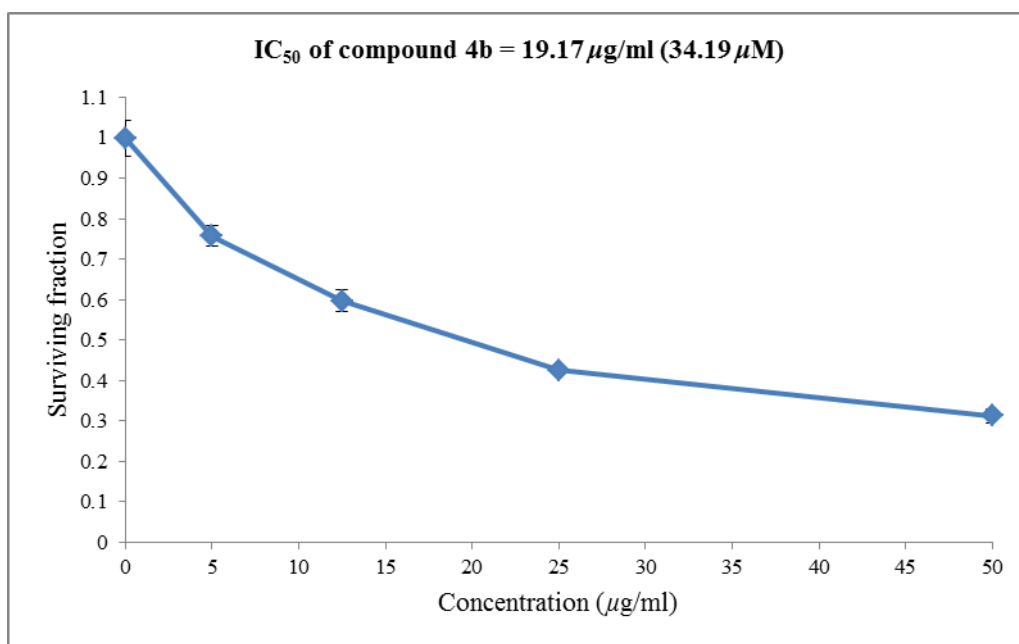

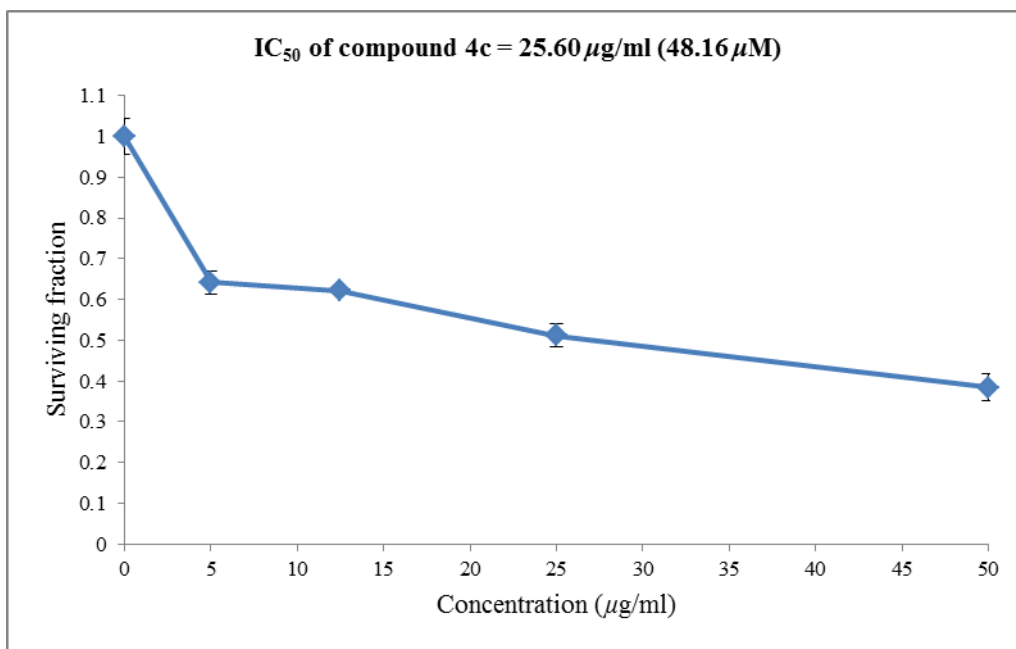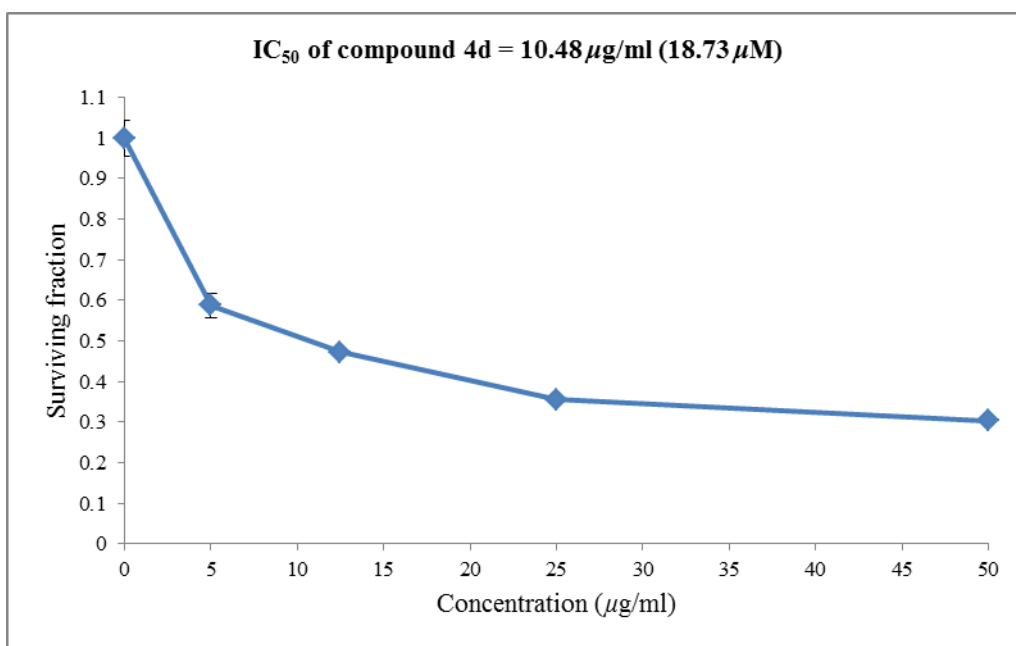



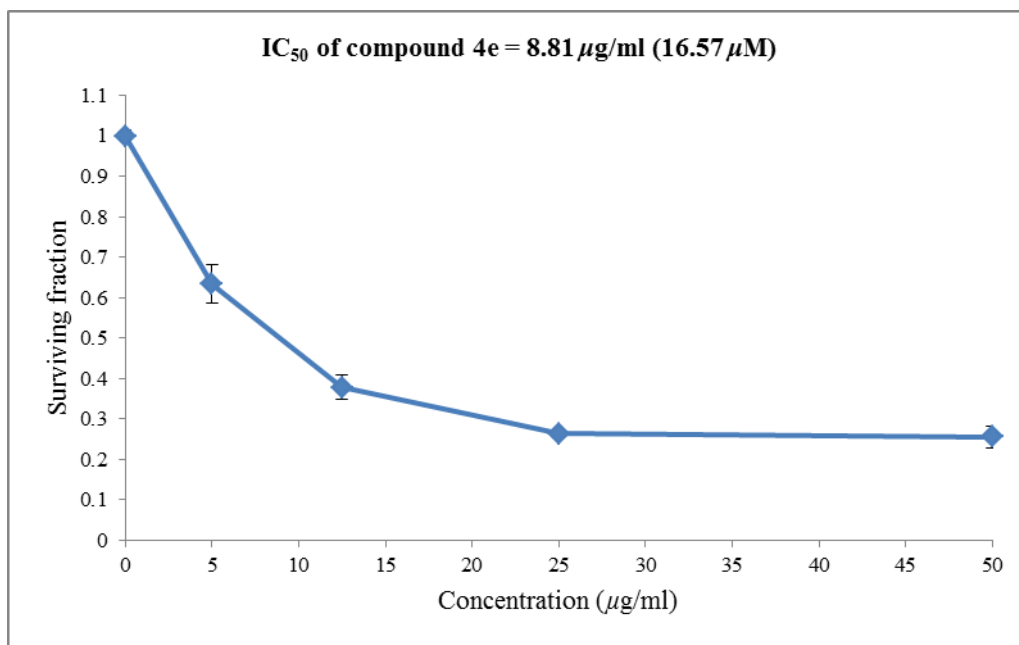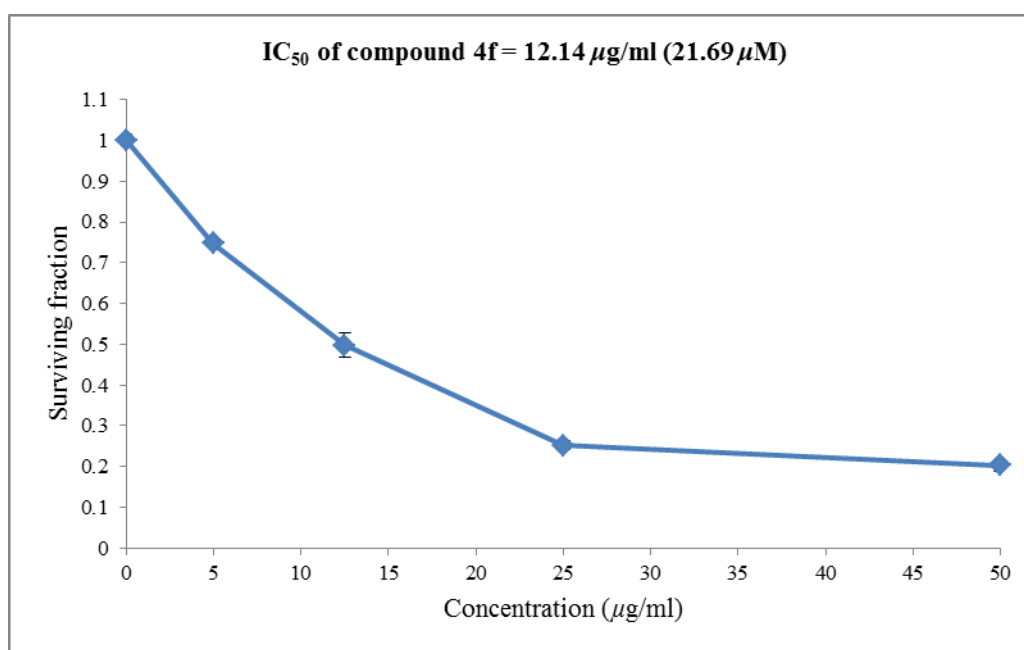

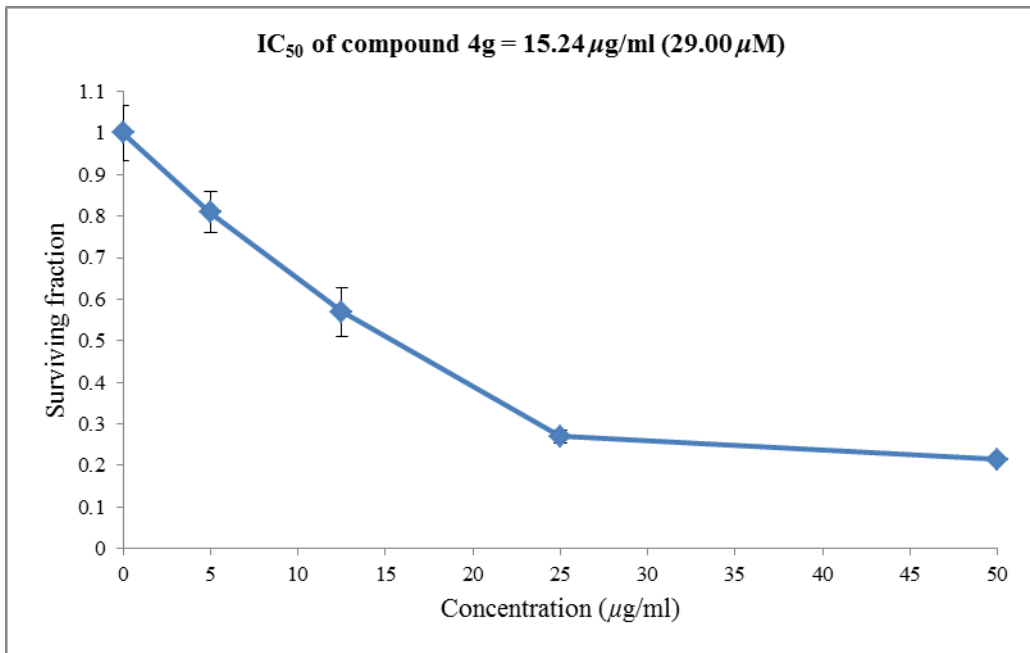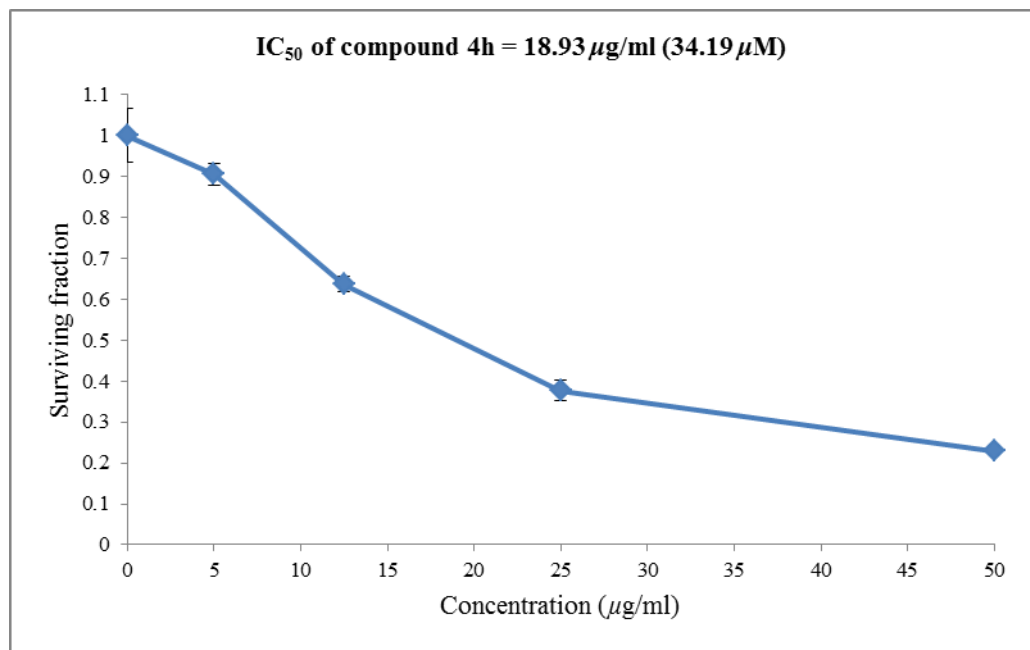

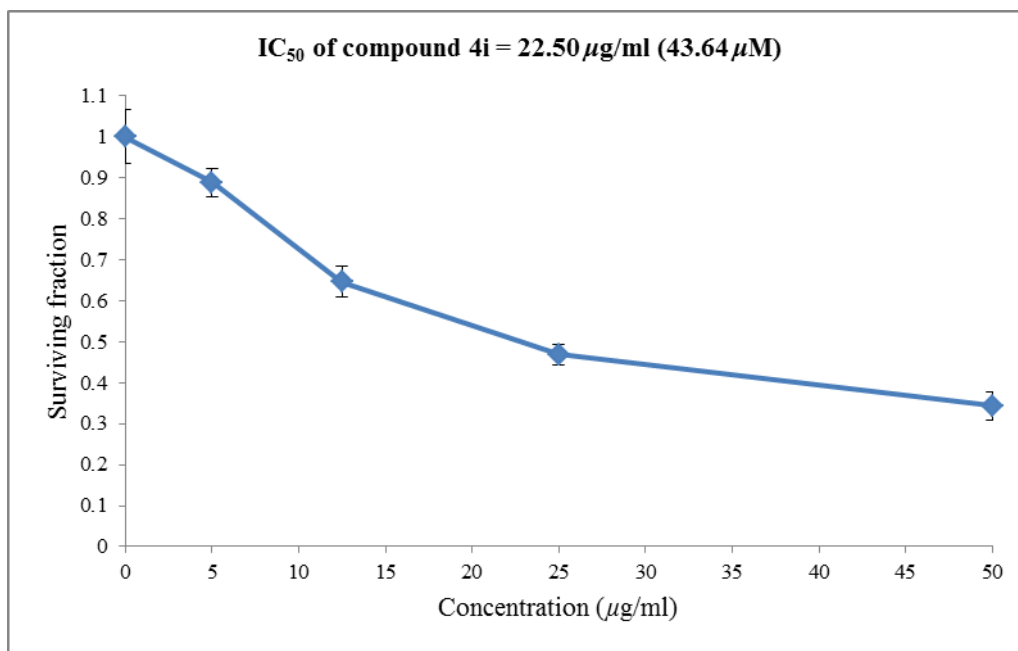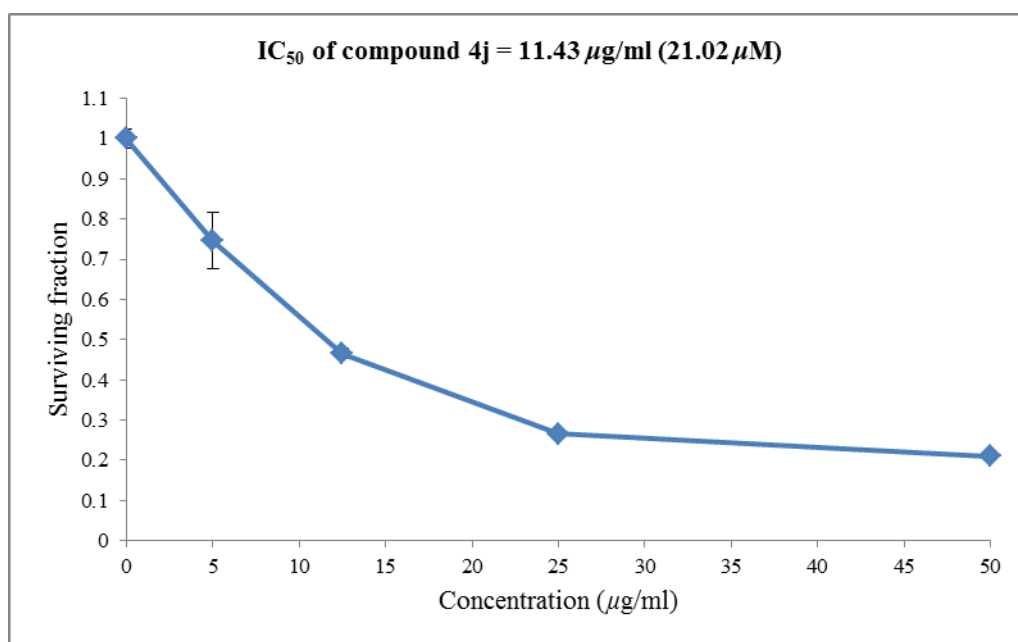

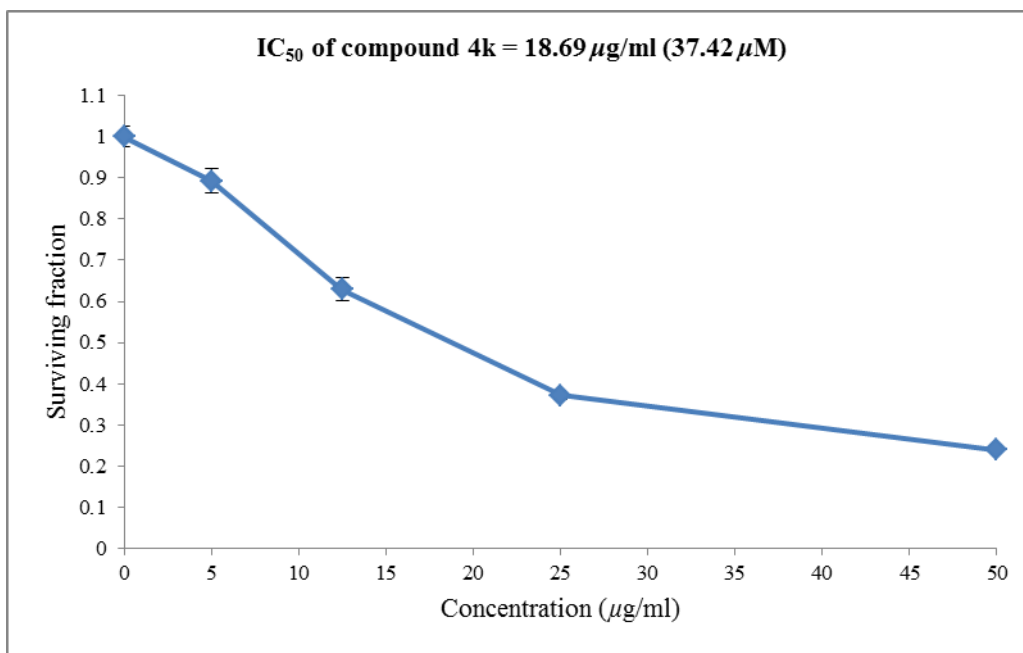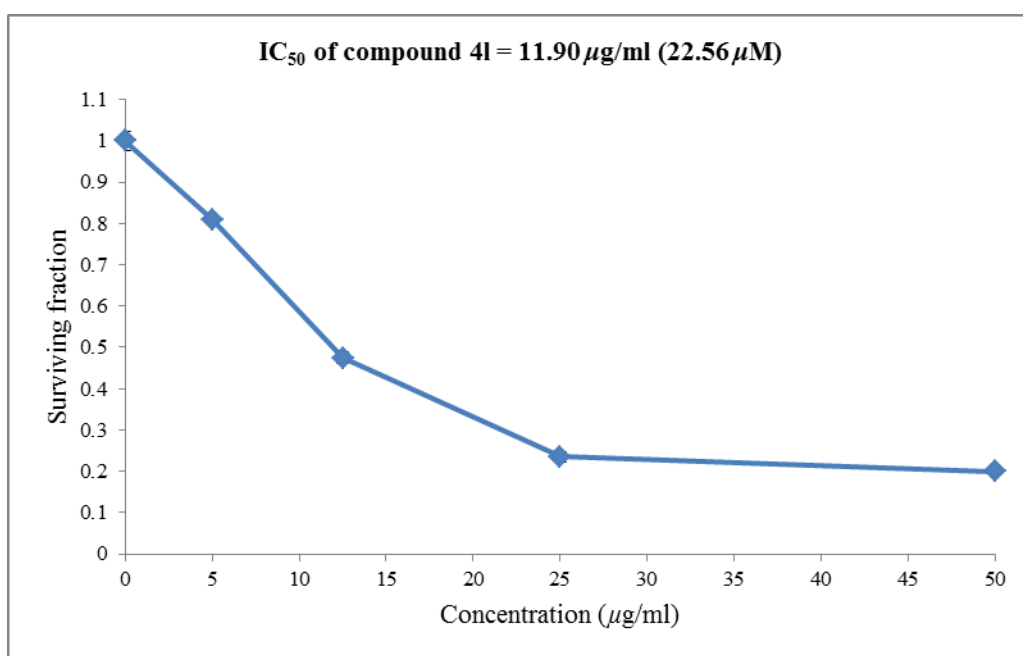

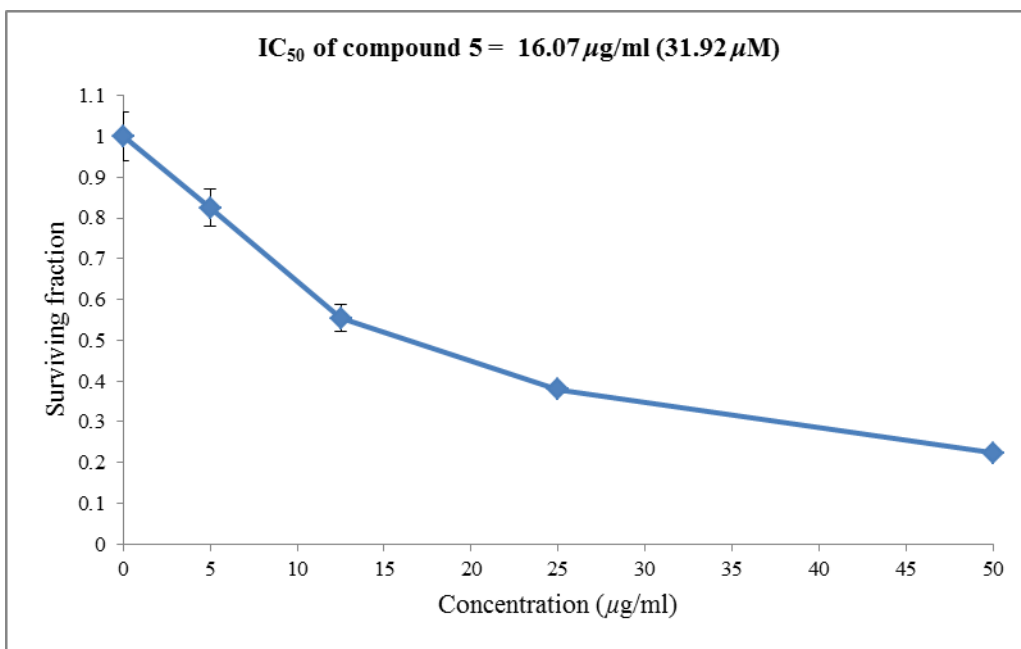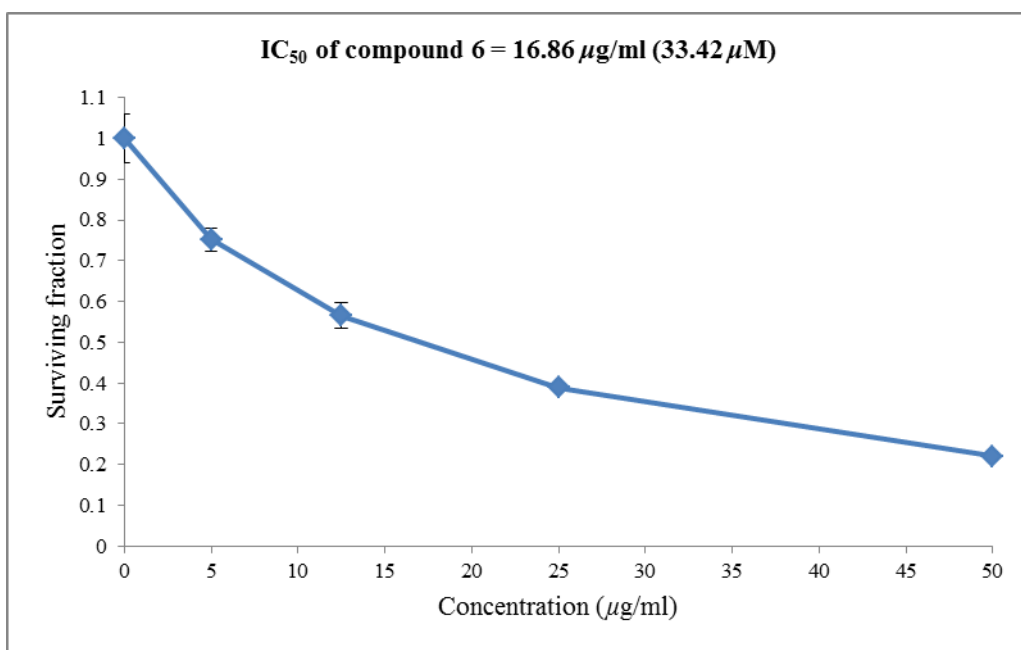

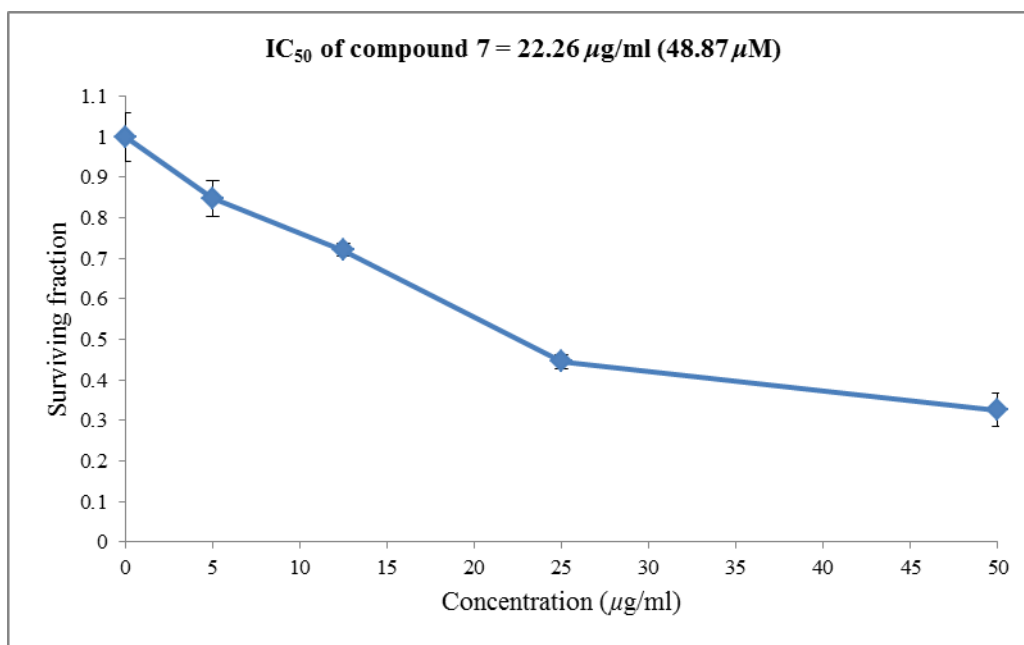

**Figure S7.** Dose-response curves of the macrocyclic peptidomimetics **4a-1**, and **5-7** against MCF7 (breast) human tumor cell line.
